# Supplementary material for: Systematic identification of long noncoding RNAs expressed during zebrafish embryogenesis
Source: HighWire-hosted journal article supplement (doi:10.1101/gr.133009.111), 2011-11-22
Supplement: Supp_Table1revised.xlsx [file Supp_Table1revised.xlsx]

## Sheet: RNA-Seq read statistics
THIS STUDY
	Total Reads	PF (passed filter) Reads	PF Reads %	PF Reads Aligned	PF Reads Aligned %
2-4 cell	231380596	206721722	89.9493	163435922	78.7782
1000 cell	306104892	268949792	87.9344	213488504	79.3458
dome	295102502	260802404	88.4404	210060703	80.4984
shield	204893972	170367510	81.5172	130013685	74.8934
bud	263699528	234540530	89.2493	190513778	81.0755
28 hpf	258116384	231280118	89.7687	184525120	79.6878
2 dpf	280255716	247948316	88.6372	199805426	80.5269
5 dpf	239208926	209621948	88.5286	174111084	82.8174
TOTAL AVG	2.59845e+08	2.28779e+08	88.0031	1.83244e+08	79.7029
TOTAL	2078762516	1830232340		1465954222
PREVIOUS STUDIES
Vesterlund et al., BMC Developmental Biology, 2011
	Total Reads			Mapped Reads
1 cell	73527619			49957154
16 cell	85135130			59543747
512 cell	78375125			57301086
50% epiboly	78598071			51285866
TOTAL AVG	7.8909e+07			5.4522e+07
TOTAL	315635945			218087853
Aanes et al., Genome Research, 2011
	Total Reads			Mapped Reads
egg	31323986			14105191
1 cell	23506971			11435032
16/32 cell	35844766			17809822
128/256 cell	27119026			14132828
3.5 hpf (high-oblong)	37886769			18939525
5.3 hpf (50% epiboly)	55560167			21076918
TOTAL AVG	3.52069e+07			16249886
TOTAL	211241685			97499316
