# Supplementary material for: Systematic identification of long noncoding RNAs expressed during zebrafish embryogenesis
Source: HighWire-hosted journal article supplement (doi:10.1101/gr.133009.111), 2011-11-22
Supplement: Supp_Table2.xlsx [file Supp_Table2.xlsx]

## Sheet: sRNA precursors
ID	Coordinate	WT1 Unique	WT1 Total	WT2 Unique	WT2 Total	Annotation of mature sRNA(s)	intronic or exonic	type of sRNA
Zv9_00000127	chr1:2804472-2807213	485	5057	146	2377	miR17a-1, miR18a, miR191, miR20a, miR19b, miR92a-1	Exonic	miR
Zv9_00030806	chr13:28009225-28027481	211	2237	264	22683	mir30e-2	Intronic	miR
Zv9_00023789	chr9:55417516-55422084	210	1243	58	286	miR92a-2, miR18b, miR17a-2	Exonic	miR
Zv9_00013210	chr5:43889616-43891656	96	489	169	5626	mir451 & mir144	Exonic	miR
Zv9_00020821	chr8:17129072-17132842	30	33	235	2616	snoRNA precursor	intronic	snoRNA
Zv9_00005205	chr2:59934844-59957382	146	3302	71	3915	mir9-7	Intronic	miR
Zv9_00023383	chr9:30685534-30695218	128	1621	67	811	miR16c, miR15a	Exonic	miR
Zv9_00037383	chr16:45735633-45738732	96	815	57	1259	mir92b	Exon-intron junction	miR
Zv9_00009078	chr4:57625527-57980569	12	14	122	170	most likely wrong diexon, in ZFP region	Conserved
Zv9_00034241	chr14:48565579-48573723	98	101	24	25	MALAT1-homolog, has antisense single exons, accum. of sRNAs in MZdicer	exonic	MALAT1-like
Zv9_00007852	chr3:48382957-48385180	40	209	65	1911	mir199-3	Exonic	miR
Zv9_00044429	chr19:15458926-15462802	32	38	71	537	snoRNAs	intronic	snoRNA
Zv9_00044653	chr19:27949598-27956054	8	8	84	480	snoRNAs	intronic	snoRNA
Zv9_00051620	chr23:7129937-7176551	20	37	66	2801	miR1-1 (intronic) and miR133a-2 (exonic)	intronic and exonic	miR
Zv9_00057801	Zv9_scaffold3540:263999-268804	32	382	52	1955	miR1-2, miR133a-1	exonic	miR
Zv9_00022842	chr9:1631991-1639003	3	5	51	1228	miR148	exonic	miR
Zv9_00000174	chr1:6993817-6995193	6	6	35	192	snoRNAs	intronic	snoRNA
Zv9_00005961	chr3:30845520-30846328	18	30	18	39	snoRNA-D88 from intron + first exon sRNA	intronic and exonic	snoRNA+other sRNA
Zv9_00018275	chr7:22954071-23006917	9	9	23	25	U1-type and U2.2 snoRNAs	intronic	snoRNA
Zv9_00046280	chr20:55785164-55797386	5	5	23	29	few sRNAs from 5_8S_rRNA (RRNA homolog) and from miR-2190 and other miRNAs, most from unannotated region!	intronic	sRNA unknown type
Zv9_00011860	chr5:67609742-67611640	8	17	19	254	miR219-2	exonic	miR
Zv9_00037065	chr16:31440636-31455290	13	19	13	39	miR9-1	exonic	miR
Zv9_00028496	chr12:21845376-21848363	9	10	16	17	MALAT-type sRNAs covering mainly exon	exonic (mainly)	MALAT1-like
Zv9_00027164	chr11:7384484-7385648	6	6	16	52	snoRNA-Ds	intronic	snoRNA
Zv9_00008864	chr4:33831729-34083045	17	21	5	5	most likely wrong diexon, in ZFP region	intronic
Zv9_00047043	chr20:39402409-39486066	3	3	18	22	potentially wrong triexon, sRNAs in region of overlap with other antisense transcript, gene structure unclear, but sRNAs from strand of nc	intronic	sRNA unknown type
Zv9_00004700	chr2:37534674-37536136	5	5	11	47	sRNA of unknown type, 36nt (miR? snoRNA?)	intronic	sRNA unknown type
Zv9_00058239	Zv9_scaffold3524:48852-74449	3	3	12	18	sRNA of unknown type (miR? snoRNA?)	exonic and intronic	sRNA unknown type
Zv9_00013287	chr5:49887243-49958176	5	5	10	10	miR9-5	intronic	miR
Zv9_00010277	chr4:57052217-57252261	11	12	3	3	most likely wrong diexon, in ZFP region	intronic
Zv9_00044467	chr19:18416479-18423610	14	26	0	0	snoRNA-As	intronic and exonic	snoRNA
Zv9_00030367	chr13:7215911-7242113	3	3	9	9	diexon, sparse sRNAs spread out across intron at a region with antisense single exons	intron	sRNA unknown type
Zv9_00025791	chr10:45019813-45060236	5	5	6	7	miR9-2	intronic	miR
Zv9_00022318	chr9:33222446-33225827	2	2	9	21	sRNAs of unknown type	exonic	sRNA unknown type
Zv9_00015709	chr6:29540288-29544983	10	11	0	0	MALAT-type sRNAs covering exon (with antisense overlap)	exonic	MALAT1-like
Zv9_00019078	chr7:65167386-65410082	2	2	8	8	sRNAs of unknown type	intronic	sRNA unknown type
Zv9_00011799	chr5:65703571-65771094	9	9	1	1	most likely wrong diexon	intronic
Zv9_00011954	chr5:72043356-72044780	9	14	0	0	snoRNA-A57	intronic	snoRNA
Zv9_00013344	chr5:54233150-54641275	3	3	6	7	most likely wrong diexon, spurious sRNAs only
Zv9_00010057	chr4:28450578-28455031	4	4	5	5	MALAT1-type, with sRNAs over exons (mainly) + introns	exonic (mainly)	MALAT1-like
Zv9_00053305	chr23:36162677-36328681	1	1	7	7	miR10b, but antisense direction!	intronic antisense	antisense
Zv9_00009177	chr4:61318900-61414548	1	1	7	8	sRNAs of unknown type	intronic	sRNA unknown type
Zv9_00002897	chr2:14575772-14581747	1	1	7	10	sRNAs of unknown type (miRNA? snoRNA?)	intronic	sRNA unknown type
Zv9_00014136	chr6:8463418-8464777	2	2	6	6	sRNAs of unknown type	exonic	sRNA unknown type
Zv9_00010108	chr4:34926112-35159579	2	2	5	5	most likely wrong diexon	intronic
Zv9_00042843	chr18:44662367-44667102	3	3	4	12	pre-miRNA???	exonic and intronic	miR
Zv9_00034055	chr14:35474490-35621296	2	2	4	4	sRNA of unknown type, sparse	Intronic	sRNA unknown type
Zv9_00025745	chr10:43348260-43351488	2	2	4	4	sRNAs of unknown type	exonic	sRNA unknown type
Zv9_00049961	chr22:11422674-11533790	1	1	5	6	sRNAs of unknown type	exonic and intronic	sRNA unknown type
Zv9_00052809	chr23:17828711-18009916	2	2	4	5	miR124-5 and other sRNA, antisense	intronic antisense	antisense
Zv9_00041401	chr18:12566331-12841855	1	1	4	4	sRNA of unknown type, sparse	Intronic	sRNA unknown type
Zv9_00054882	chr24:25024833-25110970	1	1	4	4	antisense to sRNAs (miR124-3)	intronic antisense	antisense
Zv9_00034191	chr14:45313975-45471396	5	5	0	0	sRNA of unknown type	Intronic	sRNA unknown type
Zv9_00024401	chr10:24748048-24806356	5	5	0	0	sparse sRNAs	intronic	sRNA unknown type
