# Supplementary material for: Systematic identification of long noncoding RNAs expressed during zebrafish embryogenesis
Source: HighWire-hosted journal article supplement (doi:10.1101/gr.133009.111), 2011-11-22
Supplement: Supp_Table3.xlsx [file Supp_Table3.xlsx]

## Sheet: refseq_bivalent.genes.GO
GO ID	p-value	Description
GO:0050794	8.39466e-85	Regulation of cellular process
GO:0032502	2.24216e-79	Developmental process
GO:0007275	5.76269e-77	Multicellular organismal development
GO:0050789	2.99415e-76	Regulation of biological process
GO:0048856	1.25032e-73	Anatomical structure development
GO:0045449	3.09742e-73	Regulation of transcription
GO:0048731	2.82615e-72	System development
GO:0006355	8.17735e-72	Regulation of transcription, DNA-dependent
GO:0019219	2.05909e-71	Regulation of nucleobase, nucleoside, nucleotide and nucleic acid metabolic process
GO:0006351	9.98969e-70	Transcription, DNA-dependent
GO:0031323	1.50866e-69	Regulation of cellular metabolic process
GO:0006350	1.89098e-69	Transcription
GO:0032774	2.32599e-69	RNA biosynthetic process
GO:0019222	2.39392e-68	Regulation of metabolic process
GO:0065007	1.49544e-65	Biological regulation
GO:0032501	1.46178e-62	Multicellular organismal process
GO:0010468	1.18157e-61	Regulation of gene expression
GO:0003700	3.3076e-61	Transcription factor activity
GO:0003677	7.28801e-58	DNA binding
GO:0048513	1.8401e-57	Organ development
GO:0016070	2.94907e-51	RNA metabolic process
GO:0007399	1.01715e-48	Nervous system development
GO:0009790	3.06789e-44	Embryonic development
GO:0007389	1.08789e-42	Pattern specification process
GO:0044464	6.97156e-42	Cell part
GO:0005623	6.97156e-42	Cell
GO:0043565	1.0687e-40	Sequence-specific DNA binding
GO:0010467	1.04114e-38	Gene expression
GO:0005634	1.05396e-38	Nucleus
GO:0009653	1.67282e-36	Anatomical structure morphogenesis
GO:0003676	7.10806e-36	Nucleic acid binding
GO:0006139	1.77167e-33	Nucleobase, nucleoside, nucleotide and nucleic acid metabolic process
GO:0003002	9.09797e-33	Regionalization
GO:0005622	4.12991e-32	Intracellular
GO:0048869	4.39953e-31	Cellular developmental process
GO:0030154	4.39953e-31	Cell differentiation
GO:0007417	4.77416e-31	Central nervous system development
GO:0043227	8.83021e-31	Membrane-bound organelle
GO:0043231	8.83021e-31	Intracellular membrane-bound organelle
GO:0044424	2.71891e-30	Intracellular part
GO:0043283	1.87368e-29	Biopolymer metabolic process
GO:0009987	1.00433e-27	Cellular process
GO:0007420	1.06454e-25	Brain development
GO:0043229	3.14667e-23	Intracellular organelle
GO:0043226	3.38935e-23	Organelle
GO:0007423	4.13116e-23	Sensory organ development
GO:0009887	3.4075e-20	Organ morphogenesis
GO:0048598	1.92131e-19	Embryonic morphogenesis
GO:0022008	7.2695e-19	Neurogenesis
GO:0007166	2.09497e-18	Cell surface receptor linked signal transduction
GO:0009952	5.3138e-18	Anterior
GO:0007165	2.1743e-17	Signal transduction
GO:0043170	2.75478e-17	Macromolecule metabolic process
GO:0007154	1.72752e-16	Cell communication
GO:0048699	1.51156e-15	Generation of neurons
GO:0048646	5.57155e-15	Anatomical structure formation
GO:0009953	1.03755e-14	Dorsal
GO:0048468	1.1679e-14	Cell development
GO:0030182	1.33141e-14	Neuron differentiation
GO:0044238	1.72225e-14	Primary metabolic process
GO:0009966	7.74497e-14	Regulation of signal transduction
GO:0048519	3.47197e-13	Negative regulation of biological process
GO:0035282	3.92836e-13	Segmentation
GO:0032984	8.26056e-13	Macromolecular complex disassembly
GO:0043241	8.26056e-13	Protein complex disassembly
GO:0043624	8.26056e-13	Cellular protein complex disassembly
GO:0022411	8.26056e-13	Cellular component disassembly
GO:0009968	1.46591e-12	Negative regulation of signal transduction
GO:0031564	2.05871e-12	Transcription antitermination
GO:0006353	2.05871e-12	Transcription termination
GO:0031554	2.05871e-12	Regulation of transcription termination
GO:0031555	2.05871e-12	Transcriptional attenuation
GO:0048523	2.2233e-12	Negative regulation of cellular process
GO:0005216	2.66009e-12	Ion channel activity
GO:0022838	2.66009e-12	Substrate specific channel activity
GO:0022803	2.79651e-12	Passive transmembrane transporter activity
GO:0015267	2.79651e-12	Channel activity
GO:0044237	3.64763e-12	Cellular metabolic process
GO:0015075	6.6116e-12	Ion transmembrane transporter activity
GO:0001756	1.13138e-11	Somitogenesis
GO:0007167	1.13138e-11	Enzyme linked receptor protein signaling pathway
GO:0016043	1.20991e-11	Cellular component organization and biogenesis
GO:0043009	1.59691e-11	Chordate embryonic development
GO:0009792	1.59691e-11	Embryonic development ending in birth or egg hatching
GO:0005786	2.13077e-11	Signal recognition particle, endoplasmic reticulum targeting
GO:0048500	9.46184e-11	Signal recognition particle
GO:0043583	1.0652e-10	Ear development
GO:0016477	1.69112e-10	Cell migration
GO:0022857	3.55736e-10	Transmembrane transporter activity
GO:0048839	5.38054e-10	Inner ear development
GO:0022891	5.52981e-10	Substrate-specific transmembrane transporter activity
GO:0006928	5.95317e-10	Cell motility
GO:0051674	5.95317e-10	Localization of cell
GO:0022836	8.0813e-10	Gated channel activity
GO:0002009	8.16246e-10	Morphogenesis of an epithelium
GO:0043234	2.05025e-09	Protein complex
GO:0022892	2.36078e-09	Substrate-specific transporter activity
GO:0005579	3.41496e-09	Membrane attack complex
GO:0046930	4.68644e-09	Pore complex
GO:0007507	5.39592e-09	Heart development
GO:0005515	7.42806e-09	Protein binding
GO:0001654	1.55454e-08	Eye development
GO:0006813	7.51584e-08	Potassium ion transport
GO:0050793	7.60251e-08	Regulation of developmental process
GO:0051179	7.9181e-08	Localization
GO:0016020	8.21799e-08	Membrane
GO:0046873	1.57692e-07	Metal ion transmembrane transporter activity
GO:0009888	3.02017e-07	Tissue development
GO:0005261	3.3201e-07	Cation channel activity
GO:0008083	3.70433e-07	Growth factor activity
GO:0016021	3.7268e-07	Integral to membrane
GO:0045165	3.7268e-07	Cell fate commitment
GO:0032991	4.51809e-07	Macromolecular complex
GO:0005234	4.94538e-07	Extracellular-glutamate-gated ion channel activity
GO:0004970	4.94538e-07	Ionotropic glutamate receptor activity
GO:0005230	5.87075e-07	Extracellular ligand-gated ion channel activity
GO:0001568	6.95565e-07	Blood vessel development
GO:0000902	8.98282e-07	Cell morphogenesis
GO:0032989	8.98282e-07	Cellular structure morphogenesis
GO:0004871	9.47724e-07	Signal transducer activity
GO:0060089	9.47724e-07	Molecular transducer activity
GO:0031224	9.51957e-07	Intrinsic to membrane
GO:0016055	9.61188e-07	Wnt receptor signaling pathway
GO:0001944	1.00345e-06	Vasculature development
GO:0005667	1.2323e-06	Transcription factor complex
GO:0005654	1.26133e-06	Nucleoplasm
GO:0022834	1.34125e-06	Ligand-gated channel activity
GO:0015276	1.34125e-06	Ligand-gated ion channel activity
GO:0044451	1.45632e-06	Nucleoplasm part
GO:0046983	2.10819e-06	Protein dimerization activity
GO:0007169	3.17951e-06	Transmembrane receptor protein tyrosine kinase signaling pathway
GO:0043010	3.3238e-06	Camera-type eye development
GO:0030097	3.3238e-06	Hemopoiesis
GO:0005231	3.39643e-06	Excitatory extracellular ligand-gated ion channel activity
GO:0042471	3.86635e-06	Ear morphogenesis
GO:0030902	4.19628e-06	Hindbrain development
GO:0006811	4.29236e-06	Ion transport
GO:0007369	4.36604e-06	Gastrulation
GO:0044425	6.33982e-06	Membrane part
GO:0008324	6.52256e-06	Cation transmembrane transporter activity
GO:0009799	7.03578e-06	Determination of symmetry
GO:0009855	7.03578e-06	Determination of bilateral symmetry
GO:0051091	7.03578e-06	Positive regulation of transcription factor activity
GO:0048534	9.22525e-06	Hemopoietic or lymphoid organ development
GO:0002520	9.22525e-06	Immune system development
GO:0008200	1.01286e-05	Ion channel inhibitor activity
GO:0016248	1.01286e-05	Channel inhibitor activity
GO:0016247	1.19064e-05	Channel regulator activity
GO:0015457	1.397e-05	Auxiliary transport protein activity
GO:0042472	1.67544e-05	Inner ear morphogenesis
GO:0031981	2.36205e-05	Nuclear lumen
GO:0009798	2.3803e-05	Axis specification
GO:0048568	2.3803e-05	Embryonic organ development
GO:0048840	2.94462e-05	Otolith development
GO:0048666	3.1691e-05	Neuron development
GO:0016331	3.25002e-05	Morphogenesis of embryonic epithelium
GO:0015672	3.29603e-05	Monovalent inorganic cation transport
GO:0009880	4.39247e-05	Embryonic pattern specification
GO:0005267	4.4465e-05	Potassium channel activity
GO:0035295	4.47519e-05	Tube development
GO:0001840	5.4468e-05	Neural plate development
GO:0016564	5.4468e-05	Transcription repressor activity
GO:0005391	5.69391e-05	Sodium
GO:0006810	5.76118e-05	Transport
GO:0051234	7.35556e-05	Establishment of localization
GO:0051090	7.64628e-05	Regulation of transcription factor activity
GO:0019199	7.94481e-05	Transmembrane receptor protein kinase activity
GO:0031175	9.27978e-05	Neurite development
GO:0048514	0.000111113	Blood vessel morphogenesis
GO:0030901	0.000135805	Midbrain development
GO:0004888	0.000167097	Transmembrane receptor activity
GO:0007223	0.00024303	Wnt receptor signaling pathway, calcium modulating pathway
GO:0048264	0.000262007	Determination of ventral identity
GO:0008066	0.00029519	Glutamate receptor activity
GO:0007178	0.000316231	Transmembrane receptor protein serine
GO:0000904	0.000377005	Cellular morphogenesis during differentiation
GO:0006812	0.000425023	Cation transport
GO:0043049	0.000464073	Otic placode formation
GO:0045893	0.000464073	Positive regulation of transcription, DNA-dependent
GO:0033334	0.000562215	Fin morphogenesis
GO:0035107	0.000562215	Appendage morphogenesis
GO:0005102	0.000605275	Receptor binding
GO:0007219	0.000681522	Notch signaling pathway
GO:0030001	0.000681522	Metal ion transport
GO:0065009	0.000706535	Regulation of a molecular function
GO:0043233	0.000710357	Organelle lumen
GO:0031974	0.000710357	Membrane-enclosed lumen
GO:0021510	0.000737547	Spinal cord development
GO:0021515	0.000737547	Cell differentiation in spinal cord
GO:0021517	0.000737547	Ventral spinal cord development
GO:0048736	0.000823169	Appendage development
GO:0033333	0.000823169	Fin development
GO:0048592	0.000932932	Eye morphogenesis
GO:0060173	0.000985219	Limb development
GO:0035138	0.000985219	Pectoral fin morphogenesis
GO:0035108	0.000985219	Limb morphogenesis
GO:0035136	0.000985219	Forelimb morphogenesis
GO:0042074	0.00101239	Cell migration involved in gastrulation
GO:0051216	0.00101239	Cartilage development
GO:0007409	0.00103448	Axonogenesis
GO:0004714	0.00133886	Transmembrane receptor protein tyrosine kinase activity
GO:0048667	0.00140618	Neuron morphogenesis during differentiation
GO:0048812	0.00140618	Neurite morphogenesis
GO:0035050	0.00144998	Embryonic heart tube development
GO:0030900	0.00149192	Forebrain development
GO:0033339	0.00149192	Pectoral fin development
GO:0004872	0.00178981	Receptor activity
GO:0035162	0.00179711	Embryonic hemopoiesis
GO:0030916	0.00179711	Otic vesicle formation
GO:0001501	0.00185157	Skeletal development
GO:0016049	0.00201538	Cell growth
GO:0008361	0.00201538	Regulation of cell size
GO:0050767	0.00201538	Regulation of neurogenesis
GO:0006814	0.00280191	Sodium ion transport
GO:0035141	0.00338021	Medial fin morphogenesis
GO:0030947	0.00338021	Regulation of vascular endothelial growth factor receptor signaling pathway
GO:0060059	0.00338021	Embryonic retina morphogenesis in camera-type eye
GO:0033338	0.00338021	Medial fin development
GO:0001708	0.00360112	Cell fate specification
GO:0008037	0.00360112	Cell recognition
GO:0021522	0.00360112	Spinal cord motor neuron differentiation
GO:0048663	0.00360112	Neuron fate commitment
GO:0001763	0.00360112	Morphogenesis of a branching structure
GO:0005246	0.00367335	Calcium channel regulator activity
GO:0019855	0.00367335	Calcium channel inhibitor activity
GO:0060041	0.00376083	Retina development in camera-type eye
GO:0051093	0.00377883	Negative regulation of developmental process
GO:0007242	0.00409058	Intracellular signaling cascade
GO:0048858	0.00423883	Cell projection morphogenesis
GO:0032990	0.00423883	Cell part morphogenesis
GO:0030030	0.00423883	Cell projection organization and biogenesis
GO:0008146	0.00456958	Sulfotransferase activity
GO:0004702	0.00503732	Receptor signaling protein serine
GO:0007411	0.00503732	Axon guidance
GO:0048262	0.0052116	Determination of dorsoventral asymmetry
GO:0005578	0.00532136	Proteinaceous extracellular matrix
GO:0022832	0.00582547	Voltage-gated channel activity
GO:0015662	0.00582622	ATPase activity, coupled to transmembrane movement of ions, phosphorylative mechanism
GO:0035270	0.00582622	Endocrine system development
GO:0044456	0.00663124	Synapse part
GO:0007440	0.00674591	Foregut morphogenesis
GO:0048567	0.00674591	Ectodermal gut morphogenesis
GO:0007439	0.00674591	Ectodermal gut development
GO:0048618	0.00674591	Post-embryonic foregut morphogenesis
GO:0048612	0.00674591	Post-embryonic ectodermal gut development
GO:0048621	0.00674591	Post-embryonic gut morphogenesis
GO:0048614	0.00674591	Post-embryonic ectodermal gut morphogenesis
GO:0030326	0.00674591	Embryonic limb morphogenesis
GO:0035118	0.00674591	Embryonic pectoral fin morphogenesis
GO:0035113	0.00674591	Embryonic appendage morphogenesis
GO:0035115	0.00674591	Embryonic forelimb morphogenesis
GO:0001704	0.00683407	Formation of primary germ layer
GO:0003007	0.0071385	Heart morphogenesis
GO:0022610	0.00855264	Biological adhesion
GO:0007155	0.00855264	Cell adhesion
GO:0030510	0.0086204	Regulation of BMP signaling pathway
GO:0016782	0.00898508	Transferase activity, transferring sulfur-containing groups
GO:0007368	0.00898508	Determination of left
GO:0048547	0.00964589	Gut morphogenesis
GO:0005003	0.00964589	Ephrin receptor activity
GO:0007418	0.00964589	Ventral midline development
GO:0050768	0.00964589	Negative regulation of neurogenesis
GO:0048546	0.00964589	Digestive tract morphogenesis

## Sheet: refseq_bivalent_shield.genes.GO
GO ID	p-value	Description
GO:0032502	1.34049e-44	Developmental process
GO:0007389	1.85303e-41	Pattern specification process
GO:0048856	7.81891e-40	Anatomical structure development
GO:0007275	2.36314e-39	Multicellular organismal development
GO:0009790	2.36314e-39	Embryonic development
GO:0048731	2.12707e-37	System development
GO:0050794	7.99476e-34	Regulation of cellular process
GO:0003002	3.69511e-33	Regionalization
GO:0048513	3.28933e-30	Organ development
GO:0050789	2.04544e-29	Regulation of biological process
GO:0007399	5.14394e-28	Nervous system development
GO:0032501	3.30052e-27	Multicellular organismal process
GO:0006355	4.78139e-26	Regulation of transcription, DNA-dependent
GO:0045449	5.86936e-26	Regulation of transcription
GO:0019219	3.68987e-25	Regulation of nucleobase, nucleoside, nucleotide and nucleic acid metabolic process
GO:0006351	7.81554e-25	Transcription, DNA-dependent
GO:0031323	1.07667e-24	Regulation of cellular metabolic process
GO:0032774	1.10091e-24	RNA biosynthetic process
GO:0065007	1.70655e-24	Biological regulation
GO:0006350	2.02308e-24	Transcription
GO:0048869	2.36902e-24	Cellular developmental process
GO:0030154	2.36902e-24	Cell differentiation
GO:0019222	2.78334e-24	Regulation of metabolic process
GO:0009653	8.68338e-22	Anatomical structure morphogenesis
GO:0010468	9.1338e-22	Regulation of gene expression
GO:0003677	1.88356e-21	DNA binding
GO:0009952	4.57634e-20	Anterior
GO:0005634	1.09036e-19	Nucleus
GO:0005622	2.81126e-19	Intracellular
GO:0007417	2.81126e-19	Central nervous system development
GO:0016070	1.42413e-18	RNA metabolic process
GO:0003700	1.4926e-18	Transcription factor activity
GO:0048598	2.71759e-18	Embryonic morphogenesis
GO:0044464	4.40403e-18	Cell part
GO:0005623	4.40403e-18	Cell
GO:0003676	2.90697e-17	Nucleic acid binding
GO:0009987	5.61458e-16	Cellular process
GO:0043227	5.61504e-16	Membrane-bound organelle
GO:0043231	5.61504e-16	Intracellular membrane-bound organelle
GO:0044424	9.55842e-16	Intracellular part
GO:0010467	3.37784e-15	Gene expression
GO:0006139	1.27555e-13	Nucleobase, nucleoside, nucleotide and nucleic acid metabolic process
GO:0007420	2.41227e-13	Brain development
GO:0043283	3.60886e-13	Biopolymer metabolic process
GO:0048646	3.93417e-13	Anatomical structure formation
GO:0048468	5.81663e-13	Cell development
GO:0043009	8.27612e-13	Chordate embryonic development
GO:0009792	8.27612e-13	Embryonic development ending in birth or egg hatching
GO:0043229	4.10433e-12	Intracellular organelle
GO:0043226	4.24282e-12	Organelle
GO:0022008	6.73883e-12	Neurogenesis
GO:0043565	1.73121e-11	Sequence-specific DNA binding
GO:0007167	6.80265e-11	Enzyme linked receptor protein signaling pathway
GO:0007423	1.31363e-10	Sensory organ development
GO:0007165	2.17407e-10	Signal transduction
GO:0007154	3.10817e-10	Cell communication
GO:0009887	3.36663e-10	Organ morphogenesis
GO:0007166	5.90434e-10	Cell surface receptor linked signal transduction
GO:0043170	1.05009e-09	Macromolecule metabolic process
GO:0009888	7.6394e-09	Tissue development
GO:0016477	2.65215e-08	Cell migration
GO:0048699	3.59175e-08	Generation of neurons
GO:0035282	5.42733e-08	Segmentation
GO:0044238	9.6666e-08	Primary metabolic process
GO:0005515	9.6666e-08	Protein binding
GO:0002009	9.6666e-08	Morphogenesis of an epithelium
GO:0009953	1.07804e-07	Dorsal
GO:0001756	1.07804e-07	Somitogenesis
GO:0006928	1.32421e-07	Cell motility
GO:0051674	1.32421e-07	Localization of cell
GO:0016043	1.35591e-07	Cellular component organization and biogenesis
GO:0030182	5.11399e-07	Neuron differentiation
GO:0048839	6.35741e-07	Inner ear development
GO:0043583	8.7146e-07	Ear development
GO:0007507	1.70598e-06	Heart development
GO:0044237	3.56324e-06	Cellular metabolic process
GO:0016331	5.66611e-06	Morphogenesis of embryonic epithelium
GO:0048523	6.2887e-06	Negative regulation of cellular process
GO:0007369	7.46794e-06	Gastrulation
GO:0009966	8.6315e-06	Regulation of signal transduction
GO:0048519	1.2287e-05	Negative regulation of biological process
GO:0009798	1.2287e-05	Axis specification
GO:0001840	1.48454e-05	Neural plate development
GO:0009799	4.09594e-05	Determination of symmetry
GO:0009855	4.09594e-05	Determination of bilateral symmetry
GO:0031981	5.20842e-05	Nuclear lumen
GO:0044451	8.92426e-05	Nucleoplasm part
GO:0042472	8.92426e-05	Inner ear morphogenesis
GO:0030097	0.000107008	Hemopoiesis
GO:0042471	0.000122058	Ear morphogenesis
GO:0045165	0.000123376	Cell fate commitment
GO:0005654	0.000207246	Nucleoplasm
GO:0048534	0.000213158	Hemopoietic or lymphoid organ development
GO:0002520	0.000213158	Immune system development
GO:0030902	0.000225137	Hindbrain development
GO:0005667	0.000227928	Transcription factor complex
GO:0009968	0.000389632	Negative regulation of signal transduction
GO:0048568	0.000403475	Embryonic organ development
GO:0001704	0.00050804	Formation of primary germ layer
GO:0032984	0.000557992	Macromolecular complex disassembly
GO:0043241	0.000557992	Protein complex disassembly
GO:0043624	0.000557992	Cellular protein complex disassembly
GO:0022411	0.000557992	Cellular component disassembly
GO:0051179	0.000558776	Localization
GO:0007169	0.00056175	Transmembrane receptor protein tyrosine kinase signaling pathway
GO:0009880	0.00058951	Embryonic pattern specification
GO:0021510	0.000731738	Spinal cord development
GO:0021515	0.000731738	Cell differentiation in spinal cord
GO:0021517	0.000731738	Ventral spinal cord development
GO:0043233	0.000893498	Organelle lumen
GO:0031974	0.000893498	Membrane-enclosed lumen
GO:0035295	0.000976712	Tube development
GO:0007368	0.000976712	Determination of left
GO:0031564	0.00111491	Transcription antitermination
GO:0006353	0.00111491	Transcription termination
GO:0031554	0.00111491	Regulation of transcription termination
GO:0031555	0.00111491	Transcriptional attenuation
GO:0030901	0.00112404	Midbrain development
GO:0042074	0.00113999	Cell migration involved in gastrulation
GO:0035050	0.0011687	Embryonic heart tube development
GO:0007178	0.0011687	Transmembrane receptor protein serine
GO:0016564	0.00125418	Transcription repressor activity
GO:0046983	0.00139711	Protein dimerization activity
GO:0016055	0.0016237	Wnt receptor signaling pathway
GO:0048264	0.00168064	Determination of ventral identity
GO:0007219	0.0017295	Notch signaling pathway
GO:0044428	0.00194936	Nuclear part
GO:0007498	0.00229979	Mesoderm development
GO:0043049	0.0024573	Otic placode formation
GO:0045893	0.0024573	Positive regulation of transcription, DNA-dependent
GO:0048522	0.00298328	Positive regulation of cellular process
GO:0004714	0.00347313	Transmembrane receptor protein tyrosine kinase activity
GO:0005786	0.00435605	Signal recognition particle, endoplasmic reticulum targeting
GO:0009948	0.00435605	Anterior
GO:0005391	0.00435605	Sodium
GO:0021522	0.00460437	Spinal cord motor neuron differentiation
GO:0045892	0.00460437	Negative regulation of transcription, DNA-dependent
GO:0048840	0.00460437	Otolith development
GO:0022607	0.00469843	Cellular component assembly
GO:0021915	0.00523195	Neural tube development
GO:0019199	0.00547398	Transmembrane receptor protein kinase activity
GO:0050793	0.00547398	Regulation of developmental process
GO:0030916	0.00649938	Otic vesicle formation
GO:0048500	0.0067771	Signal recognition particle
GO:0019904	0.0067771	Protein domain specific binding
GO:0051091	0.00768035	Positive regulation of transcription factor activity
GO:0005525	0.00778032	GTP binding
GO:0006812	0.00790938	Cation transport
GO:0022892	0.00814345	Substrate-specific transporter activity
GO:0007242	0.00816944	Intracellular signaling cascade
GO:0045299	0.00837394	Otolith mineralization
GO:0019001	0.00982486	Guanyl nucleotide binding
GO:0032561	0.00982486	Guanyl ribonucleotide binding
