# Supplementary material for: Systematic identification of long noncoding RNAs expressed during zebrafish embryogenesis
Source: HighWire-hosted journal article supplement (doi:10.1101/gr.133009.111), 2011-11-22
Supplement: Supp_Table4.xlsx [file Supp_Table4.xlsx]

## Sheet: Exonic_overlap.GO
GO term	p-value	GO term description
GO:0003700	0.00985	Transcription factor activity
GO:0048665	0.0122	Neuron fate specification
GO:0006457	0.0127	Protein folding
GO:0016859	0.0127	Cis-trans isomerase activity
GO:0003755	0.0127	Peptidyl-prolyl cis-trans isomerase activity
GO:0001654	0.0127	Eye development
GO:0048731	0.0127	System development
GO:0048663	0.0127	Neuron fate commitment
GO:0007423	0.0127	Sensory organ development
GO:0048598	0.0127	Embryonic morphogenesis
GO:0002009	0.0127	Morphogenesis of an epithelium
GO:0006900	0.0127	Membrane budding
GO:0005545	0.0127	Phosphatidylinositol binding
GO:0006901	0.0127	Vesicle coating
GO:0030276	0.0127	Clathrin binding
GO:0060037	0.0127	Pharyngeal system development
GO:0048268	0.0127	Clathrin cage assembly
GO:0009790	0.0127	Embryonic development
GO:0050794	0.0153	Regulation of cellular process
GO:0048856	0.0158	Anatomical structure development
GO:0044424	0.0201	Intracellular part
GO:0016050	0.0201	Vesicle organization and biogenesis
GO:0007417	0.0205	Central nervous system development
GO:0003677	0.0205	DNA binding
GO:0009653	0.0222	Anatomical structure morphogenesis
GO:0050789	0.0268	Regulation of biological process
GO:0007369	0.0268	Gastrulation
GO:0009987	0.0268	Cellular process
GO:0007399	0.0279	Nervous system development
GO:0060027	0.0279	Convergent extension involved in gastrulation
GO:0043565	0.0284	Sequence-specific DNA binding
GO:0042074	0.0284	Cell migration involved in gastrulation
GO:0006261	0.0284	DNA-dependent DNA replication
GO:0048513	0.0284	Organ development
GO:0006139	0.0302	Nucleobase, nucleoside, nucleotide and nucleic acid metabolic process
GO:0016055	0.0308	Wnt receptor signaling pathway
GO:0065007	0.0329	Biological regulation
GO:0045165	0.0338	Cell fate commitment
GO:0004239	0.038	Methionyl aminopeptidase activity
GO:0048709	0.038	Oligodendrocyte differentiation
GO:0032774	0.0383	RNA biosynthetic process
GO:0022836	0.0393	Gated channel activity
GO:0001501	0.0393	Skeletal development
GO:0030182	0.0439	Neuron differentiation
GO:0016070	0.0499	RNA metabolic process

## Sheet: Intronic_overlap.GO
GO term	p-value	GO term description
GO:0005634	2.83299e-12	Nucleus
GO:0010467	2.83299e-12	Gene expression
GO:0003676	1.88806e-11	Nucleic acid binding
GO:0043231	7.55952e-11	Intracellular membrane-bound organelle
GO:0043227	7.55952e-11	Membrane-bound organelle
GO:0003700	5.06231e-10	Transcription factor activity
GO:0016070	7.82179e-10	RNA metabolic process
GO:0050794	1.13286e-09	Regulation of cellular process
GO:0006355	1.21305e-09	Regulation of transcription, DNA-dependent
GO:0043565	1.21908e-09	Sequence-specific DNA binding
GO:0006351	1.42473e-09	Transcription, DNA-dependent
GO:0032774	1.42473e-09	RNA biosynthetic process
GO:0006139	2.36035e-09	Nucleobase, nucleoside, nucleotide and nucleic acid metabolic process
GO:0045449	5.96009e-09	Regulation of transcription
GO:0019219	7.03092e-09	Regulation of nucleobase, nucleoside, nucleotide and nucleic acid metabolic process
GO:0006350	8.44924e-09	Transcription
GO:0031323	8.68119e-09	Regulation of cellular metabolic process
GO:0019222	9.58893e-09	Regulation of metabolic process
GO:0043229	1.07763e-08	Intracellular organelle
GO:0043226	1.07763e-08	Organelle
GO:0003677	1.07763e-08	DNA binding
GO:0050789	1.07763e-08	Regulation of biological process
GO:0010468	1.92027e-08	Regulation of gene expression
GO:0043283	2.45235e-08	Biopolymer metabolic process
GO:0006353	7.56705e-08	Transcription termination
GO:0031554	7.56705e-08	Regulation of transcription termination
GO:0031555	7.56705e-08	Transcriptional attenuation
GO:0031564	7.56705e-08	Transcription antitermination
GO:0043624	7.56705e-08	Cellular protein complex disassembly
GO:0032984	7.56705e-08	Macromolecular complex disassembly
GO:0022411	7.56705e-08	Cellular component disassembly
GO:0043241	7.56705e-08	Protein complex disassembly
GO:0044424	2.42998e-07	Intracellular part
GO:0065007	1.10175e-06	Biological regulation
GO:0005622	3.54423e-06	Intracellular
GO:0043170	1.27864e-05	Macromolecule metabolic process
GO:0044238	4.45251e-05	Primary metabolic process
GO:0016043	0.000204714	Cellular component organization and biogenesis
GO:0044237	0.000246806	Cellular metabolic process
GO:0009987	0.000544551	Cellular process
GO:0044464	0.00136088	Cell part
GO:0005623	0.00136088	Cell
GO:0044267	0.00165648	Cellular protein metabolic process
GO:0044260	0.00179571	Cellular macromolecule metabolic process
GO:0019538	0.00407698	Protein metabolic process
GO:0004838	0.0269392	Tyrosine transaminase activity
GO:0005732	0.0269392	Small nucleolar ribonucleoprotein complex
GO:0004690	0.0269392	Cyclic nucleotide-dependent protein kinase activity
GO:0004692	0.0269392	CGMP-dependent protein kinase activity
GO:0032502	0.038261	Developmental process
GO:0003723	0.0480032	RNA binding

## Sheet: linc.GO
GO term	p-value	GO term description
GO:0005622	0.000814192	Intracellular
GO:0043229	0.000814192	Intracellular organelle
GO:0043226	0.000814192	Organelle
GO:0005634	0.00113959	Nucleus
GO:0044424	0.00163501	Intracellular part
GO:0043231	0.00163501	Intracellular membrane-bound organelle
GO:0043227	0.00163501	Membrane-bound organelle
GO:0006139	0.00566505	Nucleobase, nucleoside, nucleotide and nucleic acid metabolic process
GO:0044464	0.00739644	Cell part
GO:0005623	0.00739644	Cell
GO:0016043	0.0107093	Cellular component organization and biogenesis
GO:0003676	0.0129725	Nucleic acid binding
GO:0016070	0.0129725	RNA metabolic process
GO:0045445	0.0295277	Myoblast differentiation
GO:0048627	0.0295277	Myoblast development
GO:0048628	0.0295277	Myoblast maturation
GO:0006396	0.0365775	RNA processing
GO:0003677	0.0365775	DNA binding
GO:0048469	0.0365775	Cell maturation
GO:0005732	0.0365775	Small nucleolar ribonucleoprotein complex
GO:0051876	0.0365775	Pigment granule dispersal
GO:0007214	0.0365775	Gamma-aminobutyric acid signaling pathway
GO:0048741	0.0365775	Skeletal muscle fiber development
GO:0048747	0.0365775	Muscle fiber development
GO:0021700	0.0365775	Developmental maturation
GO:0042692	0.0444194	Muscle cell differentiation
GO:0007519	0.0449105	Skeletal muscle development
GO:0010467	0.0449105	Gene expression
GO:0006996	0.0494682	Organelle organization and biogenesis
GO:0004801	0.0494682	Transaldolase activity
GO:0031034	0.0494682	Myosin filament assembly
GO:0030241	0.0494682	Muscle thick filament assembly
GO:0007346	0.0494682	Regulation of progression through mitotic cell cycle
GO:0031033	0.0494682	Myosin filament assembly or disassembly
GO:0004449	0.0494682	Isocitrate dehydrogenase
GO:0043170	0.0494682	Macromolecule metabolic process
