# Supplementary material for: Systematic identification of long noncoding RNAs expressed during zebrafish embryogenesis
Source: HighWire-hosted journal article supplement (doi:10.1101/gr.133009.111), 2011-11-22
Supplement: Supp_Table5.xlsx [file Supp_Table5.xlsx]

## Sheet: bt.1
x
GO.0071805_POTASSIUM_ION_TRANSMEMBRANE_TRANSPORT	1.19306e-12
GO.0005267_POTASSIUM_CHANNEL_ACTIVITY	9.56168e-10
GO.0016627_OXIDOREDUCTASE_ACTIVITY._ACTING_ON_THE_CH_CH_GROUP_OF_DONORS	1.71521e-09
GO.0008076_VOLTAGE_GATED_POTASSIUM_CHANNEL_COMPLEX	3.0006e-09
GO.0015662_ATPASE_ACTIVITY._COUPLED_TO_TRANSMEMBRANE_MOVEMENT_OF_IONS._PHOSPHORYLATIVE_MECHANISM	3.64388e-09
GO.0006814_SODIUM_ION_TRANSPORT	3.09634e-08
GO.0008483_TRANSAMINASE_ACTIVITY	1.19747e-07
GO.0034765_REGULATION_OF_ION_TRANSMEMBRANE_TRANSPORT	1.6247e-07
GO.0005244_VOLTAGE_GATED_ION_CHANNEL_ACTIVITY	2.27618e-07
GO.0005249_VOLTAGE_GATED_POTASSIUM_CHANNEL_ACTIVITY	3.34456e-07
GO.0006813_POTASSIUM_ION_TRANSPORT	5.6703e-07
GO.0006811_ION_TRANSPORT	7.46046e-07
GO.0005216_ION_CHANNEL_ACTIVITY	8.02057e-07
GO.0006816_CALCIUM_ION_TRANSPORT	1.8865e-06
GO.0045211_POSTSYNAPTIC_MEMBRANE	1.90765e-06
GO.0045202_SYNAPSE	3.76039e-06
GO.0008236_SERINE_TYPE_PEPTIDASE_ACTIVITY	4.61433e-06
GO.0007601_VISUAL_PERCEPTION	1.47951e-05
GO.0008021_SYNAPTIC_VESICLE	1.48749e-05
GO.0006836_NEUROTRANSMITTER_TRANSPORT	6.79361e-05
GO.0005215_TRANSPORTER_ACTIVITY	0.000216177
GO.0030054_CELL_JUNCTION	0.000362355
GO.0005777_PEROXISOME	0.000900546
GO.0005179_HORMONE_ACTIVITY	0.0311675
GO.0007186_G_PROTEIN_COUPLED_RECEPTOR_PROTEIN_SIGNALING_PATHWAY	0.035546
GO.0005230_EXTRACELLULAR_LIGAND_GATED_ION_CHANNEL_ACTIVITY	0.0632893
GO.0004896_CYTOKINE_RECEPTOR_ACTIVITY	0.0634496
GO.0030170_PYRIDOXAL_PHOSPHATE_BINDING	0.0761475
GO.0006096_GLYCOLYSIS	0.120746
GO.0004386_HELICASE_ACTIVITY	1
GO.0005681_SPLICEOSOMAL_COMPLEX	1
GO.0005694_CHROMOSOME	1
GO.0006281_DNA_REPAIR	1
GO.0006396_RNA_PROCESSING	1
GO.0006397_MRNA_PROCESSING	1
GO.0006974_RESPONSE_TO_DNA_DAMAGE_STIMULUS	1
GO.0008026_ATP_DEPENDENT_HELICASE_ACTIVITY	1
GO.0008380_RNA_SPLICING	1
GO.0016607_NUCLEAR_SPECK	1
GO.0042393_HISTONE_BINDING	1
GO.0051301_CELL_DIVISION	1
GO.0000775_CHROMOSOME._CENTROMERIC_REGION	1
GO.0000776_KINETOCHORE	1
GO.0003723_RNA_BINDING	1
GO.0003899_DNA_DIRECTED_RNA_POLYMERASE_ACTIVITY	1
GO.0005643_NUCLEAR_PORE	1
GO.0005689_U12_TYPE_SPLICEOSOMAL_COMPLEX	1
GO.0005730_NUCLEOLUS	1
GO.0006260_DNA_REPLICATION	1
GO.0006357_REGULATION_OF_TRANSCRIPTION_FROM_RNA_POLYMERASE_II_PROMOTER	1
GO.0006367_TRANSCRIPTION_INITIATION_FROM_RNA_POLYMERASE_II_PROMOTER	1
GO.0007049_CELL_CYCLE	1
GO.0007067_MITOSIS	1
GO.0007498_MESODERM_DEVELOPMENT	1
GO.0008033_TRNA_PROCESSING	1
GO.0008094_DNA_DEPENDENT_ATPASE_ACTIVITY	1
GO.0010212_RESPONSE_TO_IONIZING_RADIATION	1
GO.0016568_CHROMATIN_MODIFICATION	1
GO.0016592_MEDIATOR_COMPLEX	1
GO.0051028_MRNA_TRANSPORT	1
GO.0070936_PROTEIN_K48_LINKED_UBIQUITINATION	1
GO.0000079_REGULATION_OF_CYCLIN_DEPENDENT_PROTEIN_KINASE_ACTIVITY	1
GO.0000786_NUCLEOSOME	1
GO.0001756_SOMITOGENESIS	1
GO.0003143_EMBRYONIC_HEART_TUBE_MORPHOGENESIS	1
GO.0003682_CHROMATIN_BINDING	1
GO.0003777_MICROTUBULE_MOTOR_ACTIVITY	1
GO.0006310_DNA_RECOMBINATION	1
GO.0006334_NUCLEOSOME_ASSEMBLY	1
GO.0006366_TRANSCRIPTION_FROM_RNA_POLYMERASE_II_PROMOTER	1
GO.0006417_REGULATION_OF_TRANSLATION	1
GO.0007059_CHROMOSOME_SEGREGATION	1
GO.0008287_PROTEIN_SERINE_THREONINE_PHOSPHATASE_COMPLEX	1
GO.0009880_EMBRYONIC_PATTERN_SPECIFICATION	1
GO.0009952_ANTERIOR_POSTERIOR_PATTERN_FORMATION	1
GO.0009953_DORSAL_VENTRAL_PATTERN_FORMATION	1
GO.0016817_HYDROLASE_ACTIVITY._ACTING_ON_ACID_ANHYDRIDES	1
GO.0030901_MIDBRAIN_DEVELOPMENT	1
GO.0042074_CELL_MIGRATION_INVOLVED_IN_GASTRULATION	1
GO.0042254_RIBOSOME_BIOGENESIS	1
GO.0043049_OTIC_PLACODE_FORMATION	1
GO.0000122_NEGATIVE_REGULATION_OF_TRANSCRIPTION_FROM_RNA_POLYMERASE_II_PROMOTER	1
GO.0000209_PROTEIN_POLYUBIQUITINATION	1
GO.0000785_CHROMATIN	1
GO.0000910_CYTOKINESIS	1
GO.0000922_SPINDLE_POLE	1
GO.0001666_RESPONSE_TO_HYPOXIA	1
GO.0001755_NEURAL_CREST_CELL_MIGRATION	1
GO.0001947_HEART_LOOPING	1
GO.0003007_HEART_MORPHOGENESIS	1
GO.0003714_TRANSCRIPTION_COREPRESSOR_ACTIVITY	1
GO.0003725_DOUBLE_STRANDED_RNA_BINDING	1
GO.0003779_ACTIN_BINDING	1
GO.0004177_AMINOPEPTIDASE_ACTIVITY	1
GO.0004180_CARBOXYPEPTIDASE_ACTIVITY	1
GO.0004252_SERINE_TYPE_ENDOPEPTIDASE_ACTIVITY	1
GO.0004527_EXONUCLEASE_ACTIVITY	1
GO.0004553_HYDROLASE_ACTIVITY._HYDROLYZING_O_GLYCOSYL_COMPOUNDS	1
GO.0004713_PROTEIN_TYROSINE_KINASE_ACTIVITY	1
GO.0004721_PHOSPHOPROTEIN_PHOSPHATASE_ACTIVITY	1
GO.0004871_SIGNAL_TRANSDUCER_ACTIVITY	1
GO.0004888_TRANSMEMBRANE_RECEPTOR_ACTIVITY	1
GO.0005102_RECEPTOR_BINDING	1
GO.0005385_ZINC_ION_TRANSMEMBRANE_TRANSPORTER_ACTIVITY	1
GO.0005624_MEMBRANE_FRACTION	1
GO.0005667_TRANSCRIPTION_FACTOR_COMPLEX	1
GO.0005739_MITOCHONDRION	1
GO.0005743_MITOCHONDRIAL_INNER_MEMBRANE	1
GO.0005765_LYSOSOMAL_MEMBRANE	1
GO.0005792_MICROSOME	1
GO.0005815_MICROTUBULE_ORGANIZING_CENTER	1
GO.0005819_SPINDLE	1
GO.0005874_MICROTUBULE	1
GO.0005876_SPINDLE_MICROTUBULE	1
GO.0005886_PLASMA_MEMBRANE	1
GO.0005921_GAP_JUNCTION	1
GO.0005922_CONNEXON_COMPLEX	1
GO.0006289_NUCLEOTIDE_EXCISION_REPAIR	1
GO.0006414_TRANSLATIONAL_ELONGATION	1
GO.0006457_PROTEIN_FOLDING	1
GO.0006468_PROTEIN_PHOSPHORYLATION	1
GO.0006511_UBIQUITIN_DEPENDENT_PROTEIN_CATABOLIC_PROCESS	1
GO.0006629_LIPID_METABOLIC_PROCESS	1
GO.0006633_FATTY_ACID_BIOSYNTHETIC_PROCESS	1
GO.0006662_GLYCEROL_ETHER_METABOLIC_PROCESS	1
GO.0006730_ONE_CARBON_METABOLIC_PROCESS	1
GO.0006950_RESPONSE_TO_STRESS	1
GO.0006955_IMMUNE_RESPONSE	1
GO.0006979_RESPONSE_TO_OXIDATIVE_STRESS	1
GO.0007017_MICROTUBULE_BASED_PROCESS	1
GO.0007018_MICROTUBULE_BASED_MOVEMENT	1
GO.0007154_CELL_COMMUNICATION	1
GO.0007160_CELL_MATRIX_ADHESION	1
GO.0007166_CELL_SURFACE_RECEPTOR_LINKED_SIGNALING_PATHWAY	1
GO.0007179_TRANSFORMING_GROWTH_FACTOR_BETA_RECEPTOR_SIGNALING_PATHWAY	1
GO.0007283_SPERMATOGENESIS	1
GO.0007368_DETERMINATION_OF_LEFT_RIGHT_SYMMETRY	1
GO.0007399_NERVOUS_SYSTEM_DEVELOPMENT	1
GO.0007507_HEART_DEVELOPMENT	1
GO.0008017_MICROTUBULE_BINDING	1
GO.0008022_PROTEIN_C_TERMINUS_BINDING	1
GO.0008134_TRANSCRIPTION_FACTOR_BINDING	1
GO.0008146_SULFOTRANSFERASE_ACTIVITY	1
GO.0008152_METABOLIC_PROCESS	1
GO.0008168_METHYLTRANSFERASE_ACTIVITY	1
GO.0008201_HEPARIN_BINDING	1
GO.0008237_METALLOPEPTIDASE_ACTIVITY	1
GO.0008373_SIALYLTRANSFERASE_ACTIVITY	1
GO.0008610_LIPID_BIOSYNTHETIC_PROCESS	1
GO.0009055_ELECTRON_CARRIER_ACTIVITY	1
GO.0009408_RESPONSE_TO_HEAT	1
GO.0009615_RESPONSE_TO_VIRUS	1
GO.0009897_EXTERNAL_SIDE_OF_PLASMA_MEMBRANE	1
GO.0016311_DEPHOSPHORYLATION	1
GO.0016477_CELL_MIGRATION	1
GO.0016605_PML_BODY	1
GO.0016616_OXIDOREDUCTASE_ACTIVITY._ACTING_ON_THE_CH_OH_GROUP_OF_DONORS._NAD_OR_NADP_AS_ACCEPTOR	1
GO.0016702_OXIDOREDUCTASE_ACTIVITY._ACTING_ON_SINGLE_DONORS_WITH_INCORPORATION_OF_MOLECULAR_OXYGEN._INCORPORATION_OF_TWO_ATOMS_OF_OXYGEN	1
GO.0016772_TRANSFERASE_ACTIVITY._TRANSFERRING_PHOSPHORUS_CONTAINING_GROUPS	1
GO.0016779_NUCLEOTIDYLTRANSFERASE_ACTIVITY	1
GO.0016791_PHOSPHATASE_ACTIVITY	1
GO.0016810_HYDROLASE_ACTIVITY._ACTING_ON_CARBON_NITROGEN_.BUT_NOT_PEPTIDE._BONDS	1
GO.0016881_ACID_AMINO_ACID_LIGASE_ACTIVITY	1
GO.0018024_HISTONE_LYSINE_N_METHYLTRANSFERASE_ACTIVITY	1
GO.0019001_GUANYL_NUCLEOTIDE_BINDING	1
GO.0019899_ENZYME_BINDING	1
GO.0019901_PROTEIN_KINASE_BINDING	1
GO.0022857_TRANSMEMBRANE_TRANSPORTER_ACTIVITY	1
GO.0030097_HEMOPOIESIS	1
GO.0030163_PROTEIN_CATABOLIC_PROCESS	1
GO.0030176_INTEGRAL_TO_ENDOPLASMIC_RETICULUM_MEMBRANE	1
GO.0030218_ERYTHROCYTE_DIFFERENTIATION	1
GO.0030308_NEGATIVE_REGULATION_OF_CELL_GROWTH	1
GO.0031016_PANCREAS_DEVELOPMENT	1
GO.0031017_EXOCRINE_PANCREAS_DEVELOPMENT	1
GO.0031101_FIN_REGENERATION	1
GO.0031965_NUCLEAR_MEMBRANE	1
GO.0032313_REGULATION_OF_RAB_GTPASE_ACTIVITY	1
GO.0035091_PHOSPHATIDYLINOSITOL_BINDING	1
GO.0035162_EMBRYONIC_HEMOPOIESIS	1
GO.0040007_GROWTH	1
GO.0042826_HISTONE_DEACETYLASE_BINDING	1
GO.0043010_CAMERA_TYPE_EYE_DEVELOPMENT	1
GO.0043169_CATION_BINDING	1
GO.0043234_PROTEIN_COMPLEX	1
GO.0043966_HISTONE_H3_ACETYLATION	1
GO.0045087_INNATE_IMMUNE_RESPONSE	1
GO.0045892_NEGATIVE_REGULATION_OF_TRANSCRIPTION._DNA_DEPENDENT	1
GO.0048514_BLOOD_VESSEL_MORPHOGENESIS	1
GO.0048703_EMBRYONIC_VISCEROCRANIUM_MORPHOGENESIS	1
GO.0048793_PRONEPHROS_DEVELOPMENT	1
GO.0050660_FLAVIN_ADENINE_DINUCLEOTIDE_BINDING	1
GO.0050821_PROTEIN_STABILIZATION	1
GO.0051082_UNFOLDED_PROTEIN_BINDING	1
GO.0051216_CARTILAGE_DEVELOPMENT	1
GO.0051537_2_IRON._2_SULFUR_CLUSTER_BINDING	1
GO.0051539_4_IRON._4_SULFUR_CLUSTER_BINDING	1
GO.0051592_RESPONSE_TO_CALCIUM_ION	1
GO.0051726_REGULATION_OF_CELL_CYCLE	1
GO.0055085_TRANSMEMBRANE_TRANSPORT	1
GO.0060026_CONVERGENT_EXTENSION	1
GO.0060028_CONVERGENT_EXTENSION_INVOLVED_IN_AXIS_ELONGATION	1
GO.0070588_CALCIUM_ION_TRANSMEMBRANE_TRANSPORT	1
GO.0090090_NEGATIVE_REGULATION_OF_CANONICAL_WNT_RECEPTOR_SIGNALING_PATHWAY	1
GO.0001525_ANGIOGENESIS	1
GO.0001568_BLOOD_VESSEL_DEVELOPMENT	1
GO.0001570_VASCULOGENESIS	1
GO.0001764_NEURON_MIGRATION	1
GO.0001889_LIVER_DEVELOPMENT	1
GO.0002040_SPROUTING_ANGIOGENESIS	1
GO.0003684_DAMAGED_DNA_BINDING	1
GO.0003713_TRANSCRIPTION_COACTIVATOR_ACTIVITY	1
GO.0003729_MRNA_BINDING	1
GO.0004221_UBIQUITIN_THIOLESTERASE_ACTIVITY	1
GO.0004672_PROTEIN_KINASE_ACTIVITY	1
GO.0004674_PROTEIN_SERINE_THREONINE_KINASE_ACTIVITY	1
GO.0004722_PROTEIN_SERINE_THREONINE_PHOSPHATASE_ACTIVITY	1
GO.0004842_UBIQUITIN_PROTEIN_LIGASE_ACTIVITY	1
GO.0005044_SCAVENGER_RECEPTOR_ACTIVITY	1
GO.0005506_IRON_ION_BINDING	1
GO.0005507_COPPER_ION_BINDING	1
GO.0005654_NUCLEOPLASM	1
GO.0006418_TRNA_AMINOACYLATION_FOR_PROTEIN_TRANSLATION	1
GO.0006754_ATP_BIOSYNTHETIC_PROCESS	1
GO.0006812_CATION_TRANSPORT	1
GO.0007169_TRANSMEMBRANE_RECEPTOR_PROTEIN_TYROSINE_KINASE_SIGNALING_PATHWAY	1
GO.0007219_NOTCH_SIGNALING_PATHWAY	1
GO.0007229_INTEGRIN_MEDIATED_SIGNALING_PATHWAY	1
GO.0007243_INTRACELLULAR_PROTEIN_KINASE_CASCADE	1
GO.0007420_BRAIN_DEVELOPMENT	1
GO.0007596_BLOOD_COAGULATION	1
GO.0008045_MOTOR_AXON_GUIDANCE	1
GO.0008284_POSITIVE_REGULATION_OF_CELL_PROLIFERATION	1
GO.0008305_INTEGRIN_COMPLEX	1
GO.0016055_WNT_RECEPTOR_SIGNALING_PATHWAY	1
GO.0016705_OXIDOREDUCTASE_ACTIVITY._ACTING_ON_PAIRED_DONORS._WITH_INCORPORATION_OR_REDUCTION_OF_MOLECULAR_OXYGEN	1
GO.0019825_OXYGEN_BINDING	1
GO.0019904_PROTEIN_DOMAIN_SPECIFIC_BINDING	1
GO.0020037_HEME_BINDING	1
GO.0030182_NEURON_DIFFERENTIATION	1
GO.0030917_MIDBRAIN_HINDBRAIN_BOUNDARY_DEVELOPMENT	1
GO.0031290_RETINAL_GANGLION_CELL_AXON_GUIDANCE	1
GO.0031410_CYTOPLASMIC_VESICLE	1
GO.0032259_METHYLATION	1
GO.0042493_RESPONSE_TO_DRUG	1
GO.0045944_POSITIVE_REGULATION_OF_TRANSCRIPTION_FROM_RNA_POLYMERASE_II_PROMOTER	1
GO.0050896_RESPONSE_TO_STIMULUS	1
GO.0051287_NAD_BINDING	1
GO.0060041_RETINA_DEVELOPMENT_IN_CAMERA_TYPE_EYE	1
GO.0060047_HEART_CONTRACTION	1
GO.0000502_PROTEASOME_COMPLEX	1
GO.0003743_TRANSLATION_INITIATION_FACTOR_ACTIVITY	1
GO.0004175_ENDOPEPTIDASE_ACTIVITY	1
GO.0004298_THREONINE_TYPE_ENDOPEPTIDASE_ACTIVITY	1
GO.0004812_AMINOACYL_TRNA_LIGASE_ACTIVITY	1
GO.0005839_PROTEASOME_CORE_COMPLEX	1
GO.0006364_RRNA_PROCESSING	1
GO.0006413_TRANSLATIONAL_INITIATION	1
GO.0007517_MUSCLE_ORGAN_DEVELOPMENT	1
GO.0030900_FOREBRAIN_DEVELOPMENT	1
GO.0030902_HINDBRAIN_DEVELOPMENT	1
GO.0030903_NOTOCHORD_DEVELOPMENT	1
GO.0042221_RESPONSE_TO_CHEMICAL_STIMULUS	1
GO.0051603_PROTEOLYSIS_INVOLVED_IN_CELLULAR_PROTEIN_CATABOLIC_PROCESS	1
GO.0003735_STRUCTURAL_CONSTITUENT_OF_RIBOSOME	1
GO.0005509_CALCIUM_ION_BINDING	1
GO.0005578_PROTEINACEOUS_EXTRACELLULAR_MATRIX	1
GO.0005747_MITOCHONDRIAL_RESPIRATORY_CHAIN_COMPLEX_I	1
GO.0005840_RIBOSOME	1
GO.0006412_TRANSLATION	1
GO.0007275_MULTICELLULAR_ORGANISMAL_DEVELOPMENT	1
GO.0015986_ATP_SYNTHESIS_COUPLED_PROTON_TRANSPORT	1
GO.0015992_PROTON_TRANSPORT	1
GO.0022627_CYTOSOLIC_SMALL_RIBOSOMAL_SUBUNIT	1
GO.0030529_RIBONUCLEOPROTEIN_COMPLEX	1
GO.0031012_EXTRACELLULAR_MATRIX	1
GO.0043565_SEQUENCE_SPECIFIC_DNA_BINDING	1
GO.0004129_CYTOCHROME_C_OXIDASE_ACTIVITY	1
GO.0005198_STRUCTURAL_MOLECULE_ACTIVITY	1
GO.0005576_EXTRACELLULAR_REGION	1
GO.0005581_COLLAGEN	1
GO.0005615_EXTRACELLULAR_SPACE	1
GO.0006099_TRICARBOXYLIC_ACID_CYCLE	1
GO.0007155_CELL_ADHESION	1
GO.0007223_WNT_RECEPTOR_SIGNALING_PATHWAY._CALCIUM_MODULATING_PATHWAY	1
GO.0007411_AXON_GUIDANCE	1
GO.0008083_GROWTH_FACTOR_ACTIVITY	1
GO.0015991_ATP_HYDROLYSIS_COUPLED_PROTON_TRANSPORT	1
GO.0046933_HYDROGEN_ION_TRANSPORTING_ATP_SYNTHASE_ACTIVITY._ROTATIONAL_MECHANISM	1
GO.0001558_REGULATION_OF_CELL_GROWTH	1
GO.0004714_TRANSMEMBRANE_RECEPTOR_PROTEIN_TYROSINE_KINASE_ACTIVITY	1
GO.0004867_SERINE_TYPE_ENDOPEPTIDASE_INHIBITOR_ACTIVITY	1
GO.0005520_INSULIN_LIKE_GROWTH_FACTOR_BINDING	1
GO.0005544_CALCIUM_DEPENDENT_PHOSPHOLIPID_BINDING	1
GO.0005882_INTERMEDIATE_FILAMENT	1
GO.0007156_HOMOPHILIC_CELL_ADHESION	1
GO.0009790_EMBRYO_DEVELOPMENT	1
GO.0009986_CELL_SURFACE	1
GO.0015078_HYDROGEN_ION_TRANSMEMBRANE_TRANSPORTER_ACTIVITY	1
GO.0051258_PROTEIN_POLYMERIZATION	1
GO.0003707_STEROID_HORMONE_RECEPTOR_ACTIVITY	1
GO.0004497_MONOOXYGENASE_ACTIVITY	1
GO.0004879_LIGAND_DEPENDENT_NUCLEAR_RECEPTOR_ACTIVITY	1
GO.0004930_G_PROTEIN_COUPLED_RECEPTOR_ACTIVITY	1
GO.0005887_INTEGRAL_TO_PLASMA_MEMBRANE	1
GO.0006821_CHLORIDE_TRANSPORT	1
GO.0007218_NEUROPEPTIDE_SIGNALING_PATHWAY	1
GO.0008289_LIPID_BINDING	1
GO.0015293_SYMPORTER_ACTIVITY	1
GO.0016491_OXIDOREDUCTASE_ACTIVITY	1
GO.0022900_ELECTRON_TRANSPORT_CHAIN	1
GO.0043401_STEROID_HORMONE_MEDIATED_SIGNALING_PATHWAY	1
GO.0055114_OXIDATION_REDUCTION_PROCESS	1

## Sheet: bt.2
x
GO.0007218_NEUROPEPTIDE_SIGNALING_PATHWAY	3.09258e-194
GO.0004879_LIGAND_DEPENDENT_NUCLEAR_RECEPTOR_ACTIVITY	4.84943e-179
GO.0030054_CELL_JUNCTION	1.75342e-178
GO.0005230_EXTRACELLULAR_LIGAND_GATED_ION_CHANNEL_ACTIVITY	4.83377e-177
GO.0003707_STEROID_HORMONE_RECEPTOR_ACTIVITY	1.17088e-176
GO.0005244_VOLTAGE_GATED_ION_CHANNEL_ACTIVITY	1.76015e-176
GO.0008021_SYNAPTIC_VESICLE	1.51221e-174
GO.0034765_REGULATION_OF_ION_TRANSMEMBRANE_TRANSPORT	9.27802e-169
GO.0007186_G_PROTEIN_COUPLED_RECEPTOR_PROTEIN_SIGNALING_PATHWAY	1.05761e-165
GO.0043401_STEROID_HORMONE_MEDIATED_SIGNALING_PATHWAY	8.41331e-159
GO.0004930_G_PROTEIN_COUPLED_RECEPTOR_ACTIVITY	5.32663e-157
GO.0006811_ION_TRANSPORT	7.9146e-153
GO.0005216_ION_CHANNEL_ACTIVITY	1.46213e-151
GO.0004867_SERINE_TYPE_ENDOPEPTIDASE_INHIBITOR_ACTIVITY	7.99107e-151
GO.0006814_SODIUM_ION_TRANSPORT	1.46131e-150
GO.0006836_NEUROTRANSMITTER_TRANSPORT	1.52011e-150
GO.0005887_INTEGRAL_TO_PLASMA_MEMBRANE	2.72577e-149
GO.0006813_POTASSIUM_ION_TRANSPORT	2.89668e-145
GO.0015293_SYMPORTER_ACTIVITY	3.2194e-144
GO.0022900_ELECTRON_TRANSPORT_CHAIN	9.95964e-141
GO.0045211_POSTSYNAPTIC_MEMBRANE	2.84889e-138
GO.0005179_HORMONE_ACTIVITY	2.44718e-136
GO.0005520_INSULIN_LIKE_GROWTH_FACTOR_BINDING	3.14928e-130
GO.0045202_SYNAPSE	3.25391e-129
GO.0005215_TRANSPORTER_ACTIVITY	5.70528e-126
GO.0016491_OXIDOREDUCTASE_ACTIVITY	6.2859e-122
GO.0015078_HYDROGEN_ION_TRANSMEMBRANE_TRANSPORTER_ACTIVITY	3.42134e-120
GO.0016627_OXIDOREDUCTASE_ACTIVITY._ACTING_ON_THE_CH_CH_GROUP_OF_DONORS	1.11426e-116
GO.0007601_VISUAL_PERCEPTION	2.35544e-113
GO.0055114_OXIDATION_REDUCTION_PROCESS	6.42505e-113
GO.0001558_REGULATION_OF_CELL_GROWTH	8.07095e-113
GO.0006096_GLYCOLYSIS	4.04553e-112
GO.0006099_TRICARBOXYLIC_ACID_CYCLE	9.27412e-108
GO.0005576_EXTRACELLULAR_REGION	1.37567e-100
GO.0004896_CYTOKINE_RECEPTOR_ACTIVITY	4.90821e-100
GO.0004129_CYTOCHROME_C_OXIDASE_ACTIVITY	5.64095e-99
GO.0015986_ATP_SYNTHESIS_COUPLED_PROTON_TRANSPORT	7.56184e-95
GO.0006821_CHLORIDE_TRANSPORT	1.40081e-92
GO.0004497_MONOOXYGENASE_ACTIVITY	7.66115e-89
GO.0005747_MITOCHONDRIAL_RESPIRATORY_CHAIN_COMPLEX_I	2.27251e-87
GO.0050896_RESPONSE_TO_STIMULUS	2.47202e-85
GO.0031012_EXTRACELLULAR_MATRIX	2.80196e-83
GO.0015991_ATP_HYDROLYSIS_COUPLED_PROTON_TRANSPORT	2.28663e-82
GO.0005249_VOLTAGE_GATED_POTASSIUM_CHANNEL_ACTIVITY	3.04269e-82
GO.0008289_LIPID_BINDING	2.62818e-81
GO.0006754_ATP_BIOSYNTHETIC_PROCESS	3.80181e-77
GO.0015992_PROTON_TRANSPORT	7.24987e-71
GO.0008483_TRANSAMINASE_ACTIVITY	8.35274e-70
GO.0031410_CYTOPLASMIC_VESICLE	3.33541e-69
GO.0008076_VOLTAGE_GATED_POTASSIUM_CHANNEL_COMPLEX	3.71325e-69
GO.0005882_INTERMEDIATE_FILAMENT	2.17809e-67
GO.0006812_CATION_TRANSPORT	1.4885e-62
GO.0007156_HOMOPHILIC_CELL_ADHESION	1.96011e-59
GO.0020037_HEME_BINDING	2.84851e-59
GO.0007155_CELL_ADHESION	7.93442e-54
GO.0005506_IRON_ION_BINDING	2.98914e-50
GO.0046933_HYDROGEN_ION_TRANSPORTING_ATP_SYNTHASE_ACTIVITY._ROTATIONAL_MECHANISM	1.8227e-47
GO.0005615_EXTRACELLULAR_SPACE	9.4336e-45
GO.0005581_COLLAGEN	4.12576e-44
GO.0022627_CYTOSOLIC_SMALL_RIBOSOMAL_SUBUNIT	1.54289e-41
GO.0005509_CALCIUM_ION_BINDING	7.66494e-38
GO.0005578_PROTEINACEOUS_EXTRACELLULAR_MATRIX	7.66494e-38
GO.0006730_ONE_CARBON_METABOLIC_PROCESS	1.04256e-36
GO.0003735_STRUCTURAL_CONSTITUENT_OF_RIBOSOME	8.50713e-34
GO.0005840_RIBOSOME	4.50582e-30
GO.0051592_RESPONSE_TO_CALCIUM_ION	2.75257e-28
GO.0005743_MITOCHONDRIAL_INNER_MEMBRANE	3.53723e-18
GO.0006629_LIPID_METABOLIC_PROCESS	3.18177e-13
GO.0016810_HYDROLASE_ACTIVITY._ACTING_ON_CARBON_NITROGEN_.BUT_NOT_PEPTIDE._BONDS	1.3739e-12
GO.0005267_POTASSIUM_CHANNEL_ACTIVITY	1.41104e-12
GO.0005198_STRUCTURAL_MOLECULE_ACTIVITY	1.17406e-10
GO.0016705_OXIDOREDUCTASE_ACTIVITY._ACTING_ON_PAIRED_DONORS._WITH_INCORPORATION_OR_REDUCTION_OF_MOLECULAR_OXYGEN	5.65537e-09
GO.0005544_CALCIUM_DEPENDENT_PHOSPHOLIPID_BINDING	1.21974e-05
GO.0004252_SERINE_TYPE_ENDOPEPTIDASE_ACTIVITY	2.11367e-05
GO.0008201_HEPARIN_BINDING	2.6433e-05
GO.0008152_METABOLIC_PROCESS	8.60987e-05
GO.0007596_BLOOD_COAGULATION	0.000157574
GO.0030170_PYRIDOXAL_PHOSPHATE_BINDING	0.000178901
GO.0005886_PLASMA_MEMBRANE	0.000457076
GO.0019825_OXYGEN_BINDING	0.00385834
GO.0008305_INTEGRIN_COMPLEX	0.00406789
GO.0030308_NEGATIVE_REGULATION_OF_CELL_GROWTH	0.508353
GO.0007229_INTEGRIN_MEDIATED_SIGNALING_PATHWAY	0.568893
GO.0004386_HELICASE_ACTIVITY	1
GO.0005681_SPLICEOSOMAL_COMPLEX	1
GO.0005694_CHROMOSOME	1
GO.0006281_DNA_REPAIR	1
GO.0006396_RNA_PROCESSING	1
GO.0006397_MRNA_PROCESSING	1
GO.0006974_RESPONSE_TO_DNA_DAMAGE_STIMULUS	1
GO.0008026_ATP_DEPENDENT_HELICASE_ACTIVITY	1
GO.0008380_RNA_SPLICING	1
GO.0016607_NUCLEAR_SPECK	1
GO.0042393_HISTONE_BINDING	1
GO.0051301_CELL_DIVISION	1
GO.0000775_CHROMOSOME._CENTROMERIC_REGION	1
GO.0000776_KINETOCHORE	1
GO.0003723_RNA_BINDING	1
GO.0003899_DNA_DIRECTED_RNA_POLYMERASE_ACTIVITY	1
GO.0005643_NUCLEAR_PORE	1
GO.0005689_U12_TYPE_SPLICEOSOMAL_COMPLEX	1
GO.0005730_NUCLEOLUS	1
GO.0006260_DNA_REPLICATION	1
GO.0006357_REGULATION_OF_TRANSCRIPTION_FROM_RNA_POLYMERASE_II_PROMOTER	1
GO.0006367_TRANSCRIPTION_INITIATION_FROM_RNA_POLYMERASE_II_PROMOTER	1
GO.0007049_CELL_CYCLE	1
GO.0007067_MITOSIS	1
GO.0007498_MESODERM_DEVELOPMENT	1
GO.0008033_TRNA_PROCESSING	1
GO.0008094_DNA_DEPENDENT_ATPASE_ACTIVITY	1
GO.0010212_RESPONSE_TO_IONIZING_RADIATION	1
GO.0016568_CHROMATIN_MODIFICATION	1
GO.0016592_MEDIATOR_COMPLEX	1
GO.0051028_MRNA_TRANSPORT	1
GO.0070936_PROTEIN_K48_LINKED_UBIQUITINATION	1
GO.0000079_REGULATION_OF_CYCLIN_DEPENDENT_PROTEIN_KINASE_ACTIVITY	1
GO.0000786_NUCLEOSOME	1
GO.0001756_SOMITOGENESIS	1
GO.0003143_EMBRYONIC_HEART_TUBE_MORPHOGENESIS	1
GO.0003682_CHROMATIN_BINDING	1
GO.0003777_MICROTUBULE_MOTOR_ACTIVITY	1
GO.0006310_DNA_RECOMBINATION	1
GO.0006334_NUCLEOSOME_ASSEMBLY	1
GO.0006366_TRANSCRIPTION_FROM_RNA_POLYMERASE_II_PROMOTER	1
GO.0006417_REGULATION_OF_TRANSLATION	1
GO.0007059_CHROMOSOME_SEGREGATION	1
GO.0008287_PROTEIN_SERINE_THREONINE_PHOSPHATASE_COMPLEX	1
GO.0009880_EMBRYONIC_PATTERN_SPECIFICATION	1
GO.0009952_ANTERIOR_POSTERIOR_PATTERN_FORMATION	1
GO.0009953_DORSAL_VENTRAL_PATTERN_FORMATION	1
GO.0016817_HYDROLASE_ACTIVITY._ACTING_ON_ACID_ANHYDRIDES	1
GO.0030901_MIDBRAIN_DEVELOPMENT	1
GO.0042074_CELL_MIGRATION_INVOLVED_IN_GASTRULATION	1
GO.0042254_RIBOSOME_BIOGENESIS	1
GO.0043049_OTIC_PLACODE_FORMATION	1
GO.0000122_NEGATIVE_REGULATION_OF_TRANSCRIPTION_FROM_RNA_POLYMERASE_II_PROMOTER	1
GO.0000209_PROTEIN_POLYUBIQUITINATION	1
GO.0000785_CHROMATIN	1
GO.0000910_CYTOKINESIS	1
GO.0000922_SPINDLE_POLE	1
GO.0001666_RESPONSE_TO_HYPOXIA	1
GO.0001755_NEURAL_CREST_CELL_MIGRATION	1
GO.0001947_HEART_LOOPING	1
GO.0003007_HEART_MORPHOGENESIS	1
GO.0003714_TRANSCRIPTION_COREPRESSOR_ACTIVITY	1
GO.0003725_DOUBLE_STRANDED_RNA_BINDING	1
GO.0003779_ACTIN_BINDING	1
GO.0004177_AMINOPEPTIDASE_ACTIVITY	1
GO.0004180_CARBOXYPEPTIDASE_ACTIVITY	1
GO.0004527_EXONUCLEASE_ACTIVITY	1
GO.0004553_HYDROLASE_ACTIVITY._HYDROLYZING_O_GLYCOSYL_COMPOUNDS	1
GO.0004713_PROTEIN_TYROSINE_KINASE_ACTIVITY	1
GO.0004721_PHOSPHOPROTEIN_PHOSPHATASE_ACTIVITY	1
GO.0004871_SIGNAL_TRANSDUCER_ACTIVITY	1
GO.0004888_TRANSMEMBRANE_RECEPTOR_ACTIVITY	1
GO.0005102_RECEPTOR_BINDING	1
GO.0005385_ZINC_ION_TRANSMEMBRANE_TRANSPORTER_ACTIVITY	1
GO.0005624_MEMBRANE_FRACTION	1
GO.0005667_TRANSCRIPTION_FACTOR_COMPLEX	1
GO.0005739_MITOCHONDRION	1
GO.0005765_LYSOSOMAL_MEMBRANE	1
GO.0005777_PEROXISOME	1
GO.0005792_MICROSOME	1
GO.0005815_MICROTUBULE_ORGANIZING_CENTER	1
GO.0005819_SPINDLE	1
GO.0005874_MICROTUBULE	1
GO.0005876_SPINDLE_MICROTUBULE	1
GO.0005921_GAP_JUNCTION	1
GO.0005922_CONNEXON_COMPLEX	1
GO.0006289_NUCLEOTIDE_EXCISION_REPAIR	1
GO.0006414_TRANSLATIONAL_ELONGATION	1
GO.0006457_PROTEIN_FOLDING	1
GO.0006468_PROTEIN_PHOSPHORYLATION	1
GO.0006511_UBIQUITIN_DEPENDENT_PROTEIN_CATABOLIC_PROCESS	1
GO.0006633_FATTY_ACID_BIOSYNTHETIC_PROCESS	1
GO.0006662_GLYCEROL_ETHER_METABOLIC_PROCESS	1
GO.0006816_CALCIUM_ION_TRANSPORT	1
GO.0006950_RESPONSE_TO_STRESS	1
GO.0006955_IMMUNE_RESPONSE	1
GO.0006979_RESPONSE_TO_OXIDATIVE_STRESS	1
GO.0007017_MICROTUBULE_BASED_PROCESS	1
GO.0007018_MICROTUBULE_BASED_MOVEMENT	1
GO.0007154_CELL_COMMUNICATION	1
GO.0007160_CELL_MATRIX_ADHESION	1
GO.0007166_CELL_SURFACE_RECEPTOR_LINKED_SIGNALING_PATHWAY	1
GO.0007179_TRANSFORMING_GROWTH_FACTOR_BETA_RECEPTOR_SIGNALING_PATHWAY	1
GO.0007283_SPERMATOGENESIS	1
GO.0007368_DETERMINATION_OF_LEFT_RIGHT_SYMMETRY	1
GO.0007399_NERVOUS_SYSTEM_DEVELOPMENT	1
GO.0007507_HEART_DEVELOPMENT	1
GO.0008017_MICROTUBULE_BINDING	1
GO.0008022_PROTEIN_C_TERMINUS_BINDING	1
GO.0008134_TRANSCRIPTION_FACTOR_BINDING	1
GO.0008146_SULFOTRANSFERASE_ACTIVITY	1
GO.0008168_METHYLTRANSFERASE_ACTIVITY	1
GO.0008236_SERINE_TYPE_PEPTIDASE_ACTIVITY	1
GO.0008237_METALLOPEPTIDASE_ACTIVITY	1
GO.0008373_SIALYLTRANSFERASE_ACTIVITY	1
GO.0008610_LIPID_BIOSYNTHETIC_PROCESS	1
GO.0009055_ELECTRON_CARRIER_ACTIVITY	1
GO.0009408_RESPONSE_TO_HEAT	1
GO.0009615_RESPONSE_TO_VIRUS	1
GO.0009897_EXTERNAL_SIDE_OF_PLASMA_MEMBRANE	1
GO.0015662_ATPASE_ACTIVITY._COUPLED_TO_TRANSMEMBRANE_MOVEMENT_OF_IONS._PHOSPHORYLATIVE_MECHANISM	1
GO.0016311_DEPHOSPHORYLATION	1
GO.0016477_CELL_MIGRATION	1
GO.0016605_PML_BODY	1
GO.0016616_OXIDOREDUCTASE_ACTIVITY._ACTING_ON_THE_CH_OH_GROUP_OF_DONORS._NAD_OR_NADP_AS_ACCEPTOR	1
GO.0016702_OXIDOREDUCTASE_ACTIVITY._ACTING_ON_SINGLE_DONORS_WITH_INCORPORATION_OF_MOLECULAR_OXYGEN._INCORPORATION_OF_TWO_ATOMS_OF_OXYGEN	1
GO.0016772_TRANSFERASE_ACTIVITY._TRANSFERRING_PHOSPHORUS_CONTAINING_GROUPS	1
GO.0016779_NUCLEOTIDYLTRANSFERASE_ACTIVITY	1
GO.0016791_PHOSPHATASE_ACTIVITY	1
GO.0016881_ACID_AMINO_ACID_LIGASE_ACTIVITY	1
GO.0018024_HISTONE_LYSINE_N_METHYLTRANSFERASE_ACTIVITY	1
GO.0019001_GUANYL_NUCLEOTIDE_BINDING	1
GO.0019899_ENZYME_BINDING	1
GO.0019901_PROTEIN_KINASE_BINDING	1
GO.0022857_TRANSMEMBRANE_TRANSPORTER_ACTIVITY	1
GO.0030097_HEMOPOIESIS	1
GO.0030163_PROTEIN_CATABOLIC_PROCESS	1
GO.0030176_INTEGRAL_TO_ENDOPLASMIC_RETICULUM_MEMBRANE	1
GO.0030218_ERYTHROCYTE_DIFFERENTIATION	1
GO.0031016_PANCREAS_DEVELOPMENT	1
GO.0031017_EXOCRINE_PANCREAS_DEVELOPMENT	1
GO.0031101_FIN_REGENERATION	1
GO.0031965_NUCLEAR_MEMBRANE	1
GO.0032313_REGULATION_OF_RAB_GTPASE_ACTIVITY	1
GO.0035091_PHOSPHATIDYLINOSITOL_BINDING	1
GO.0035162_EMBRYONIC_HEMOPOIESIS	1
GO.0040007_GROWTH	1
GO.0042826_HISTONE_DEACETYLASE_BINDING	1
GO.0043010_CAMERA_TYPE_EYE_DEVELOPMENT	1
GO.0043169_CATION_BINDING	1
GO.0043234_PROTEIN_COMPLEX	1
GO.0043966_HISTONE_H3_ACETYLATION	1
GO.0045087_INNATE_IMMUNE_RESPONSE	1
GO.0045892_NEGATIVE_REGULATION_OF_TRANSCRIPTION._DNA_DEPENDENT	1
GO.0048514_BLOOD_VESSEL_MORPHOGENESIS	1
GO.0048703_EMBRYONIC_VISCEROCRANIUM_MORPHOGENESIS	1
GO.0048793_PRONEPHROS_DEVELOPMENT	1
GO.0050660_FLAVIN_ADENINE_DINUCLEOTIDE_BINDING	1
GO.0050821_PROTEIN_STABILIZATION	1
GO.0051082_UNFOLDED_PROTEIN_BINDING	1
GO.0051216_CARTILAGE_DEVELOPMENT	1
GO.0051537_2_IRON._2_SULFUR_CLUSTER_BINDING	1
GO.0051539_4_IRON._4_SULFUR_CLUSTER_BINDING	1
GO.0051726_REGULATION_OF_CELL_CYCLE	1
GO.0055085_TRANSMEMBRANE_TRANSPORT	1
GO.0060026_CONVERGENT_EXTENSION	1
GO.0060028_CONVERGENT_EXTENSION_INVOLVED_IN_AXIS_ELONGATION	1
GO.0070588_CALCIUM_ION_TRANSMEMBRANE_TRANSPORT	1
GO.0071805_POTASSIUM_ION_TRANSMEMBRANE_TRANSPORT	1
GO.0090090_NEGATIVE_REGULATION_OF_CANONICAL_WNT_RECEPTOR_SIGNALING_PATHWAY	1
GO.0001525_ANGIOGENESIS	1
GO.0001568_BLOOD_VESSEL_DEVELOPMENT	1
GO.0001570_VASCULOGENESIS	1
GO.0001764_NEURON_MIGRATION	1
GO.0001889_LIVER_DEVELOPMENT	1
GO.0002040_SPROUTING_ANGIOGENESIS	1
GO.0003684_DAMAGED_DNA_BINDING	1
GO.0003713_TRANSCRIPTION_COACTIVATOR_ACTIVITY	1
GO.0003729_MRNA_BINDING	1
GO.0004221_UBIQUITIN_THIOLESTERASE_ACTIVITY	1
GO.0004672_PROTEIN_KINASE_ACTIVITY	1
GO.0004674_PROTEIN_SERINE_THREONINE_KINASE_ACTIVITY	1
GO.0004722_PROTEIN_SERINE_THREONINE_PHOSPHATASE_ACTIVITY	1
GO.0004842_UBIQUITIN_PROTEIN_LIGASE_ACTIVITY	1
GO.0005044_SCAVENGER_RECEPTOR_ACTIVITY	1
GO.0005507_COPPER_ION_BINDING	1
GO.0005654_NUCLEOPLASM	1
GO.0006418_TRNA_AMINOACYLATION_FOR_PROTEIN_TRANSLATION	1
GO.0007169_TRANSMEMBRANE_RECEPTOR_PROTEIN_TYROSINE_KINASE_SIGNALING_PATHWAY	1
GO.0007219_NOTCH_SIGNALING_PATHWAY	1
GO.0007243_INTRACELLULAR_PROTEIN_KINASE_CASCADE	1
GO.0007420_BRAIN_DEVELOPMENT	1
GO.0008045_MOTOR_AXON_GUIDANCE	1
GO.0008284_POSITIVE_REGULATION_OF_CELL_PROLIFERATION	1
GO.0016055_WNT_RECEPTOR_SIGNALING_PATHWAY	1
GO.0019904_PROTEIN_DOMAIN_SPECIFIC_BINDING	1
GO.0030182_NEURON_DIFFERENTIATION	1
GO.0030917_MIDBRAIN_HINDBRAIN_BOUNDARY_DEVELOPMENT	1
GO.0031290_RETINAL_GANGLION_CELL_AXON_GUIDANCE	1
GO.0032259_METHYLATION	1
GO.0042493_RESPONSE_TO_DRUG	1
GO.0045944_POSITIVE_REGULATION_OF_TRANSCRIPTION_FROM_RNA_POLYMERASE_II_PROMOTER	1
GO.0051287_NAD_BINDING	1
GO.0060041_RETINA_DEVELOPMENT_IN_CAMERA_TYPE_EYE	1
GO.0060047_HEART_CONTRACTION	1
GO.0000502_PROTEASOME_COMPLEX	1
GO.0003743_TRANSLATION_INITIATION_FACTOR_ACTIVITY	1
GO.0004175_ENDOPEPTIDASE_ACTIVITY	1
GO.0004298_THREONINE_TYPE_ENDOPEPTIDASE_ACTIVITY	1
GO.0004812_AMINOACYL_TRNA_LIGASE_ACTIVITY	1
GO.0005839_PROTEASOME_CORE_COMPLEX	1
GO.0006364_RRNA_PROCESSING	1
GO.0006413_TRANSLATIONAL_INITIATION	1
GO.0007517_MUSCLE_ORGAN_DEVELOPMENT	1
GO.0030900_FOREBRAIN_DEVELOPMENT	1
GO.0030902_HINDBRAIN_DEVELOPMENT	1
GO.0030903_NOTOCHORD_DEVELOPMENT	1
GO.0042221_RESPONSE_TO_CHEMICAL_STIMULUS	1
GO.0051603_PROTEOLYSIS_INVOLVED_IN_CELLULAR_PROTEIN_CATABOLIC_PROCESS	1
GO.0006412_TRANSLATION	1
GO.0007275_MULTICELLULAR_ORGANISMAL_DEVELOPMENT	1
GO.0030529_RIBONUCLEOPROTEIN_COMPLEX	1
GO.0043565_SEQUENCE_SPECIFIC_DNA_BINDING	1
GO.0007223_WNT_RECEPTOR_SIGNALING_PATHWAY._CALCIUM_MODULATING_PATHWAY	1
GO.0007411_AXON_GUIDANCE	1
GO.0008083_GROWTH_FACTOR_ACTIVITY	1
GO.0004714_TRANSMEMBRANE_RECEPTOR_PROTEIN_TYROSINE_KINASE_ACTIVITY	1
GO.0009790_EMBRYO_DEVELOPMENT	1
GO.0009986_CELL_SURFACE	1
GO.0051258_PROTEIN_POLYMERIZATION	1

## Sheet: bt.3
x
GO.0008083_GROWTH_FACTOR_ACTIVITY	1.74976e-36
GO.0005198_STRUCTURAL_MOLECULE_ACTIVITY	2.92822e-36
GO.0007155_CELL_ADHESION	5.34744e-34
GO.0006099_TRICARBOXYLIC_ACID_CYCLE	5.51915e-34
GO.0006096_GLYCOLYSIS	1.97101e-33
GO.0043565_SEQUENCE_SPECIFIC_DNA_BINDING	1.09044e-32
GO.0004129_CYTOCHROME_C_OXIDASE_ACTIVITY	3.15521e-30
GO.0015991_ATP_HYDROLYSIS_COUPLED_PROTON_TRANSPORT	3.15521e-30
GO.0046933_HYDROGEN_ION_TRANSPORTING_ATP_SYNTHASE_ACTIVITY._ROTATIONAL_MECHANISM	2.71574e-29
GO.0007601_VISUAL_PERCEPTION	3.65679e-29
GO.0005044_SCAVENGER_RECEPTOR_ACTIVITY	3.81779e-29
GO.0005615_EXTRACELLULAR_SPACE	1.11842e-28
GO.0015986_ATP_SYNTHESIS_COUPLED_PROTON_TRANSPORT	8.19444e-28
GO.0005747_MITOCHONDRIAL_RESPIRATORY_CHAIN_COMPLEX_I	2.31356e-27
GO.0005576_EXTRACELLULAR_REGION	3.02626e-27
GO.0005581_COLLAGEN	3.02626e-27
GO.0005509_CALCIUM_ION_BINDING	5.35469e-27
GO.0005578_PROTEINACEOUS_EXTRACELLULAR_MATRIX	5.35469e-27
GO.0007596_BLOOD_COAGULATION	7.24109e-27
GO.0015992_PROTON_TRANSPORT	1.04869e-26
GO.0015078_HYDROGEN_ION_TRANSMEMBRANE_TRANSPORTER_ACTIVITY	1.10194e-26
GO.0007223_WNT_RECEPTOR_SIGNALING_PATHWAY._CALCIUM_MODULATING_PATHWAY	2.23112e-26
GO.0008305_INTEGRIN_COMPLEX	2.8288e-25
GO.0007229_INTEGRIN_MEDIATED_SIGNALING_PATHWAY	9.73543e-25
GO.0031012_EXTRACELLULAR_MATRIX	1.9476e-24
GO.0005102_RECEPTOR_BINDING	3.81399e-24
GO.0001558_REGULATION_OF_CELL_GROWTH	8.49459e-24
GO.0007156_HOMOPHILIC_CELL_ADHESION	2.87143e-23
GO.0006412_TRANSLATION	1.54059e-22
GO.0007275_MULTICELLULAR_ORGANISMAL_DEVELOPMENT	1.08149e-21
GO.0022627_CYTOSOLIC_SMALL_RIBOSOMAL_SUBUNIT	1.95283e-21
GO.0005179_HORMONE_ACTIVITY	2.22714e-21
GO.0003735_STRUCTURAL_CONSTITUENT_OF_RIBOSOME	9.23049e-21
GO.0005215_TRANSPORTER_ACTIVITY	6.13817e-20
GO.0005840_RIBOSOME	1.81757e-19
GO.0005520_INSULIN_LIKE_GROWTH_FACTOR_BINDING	3.15048e-19
GO.0045202_SYNAPSE	1.02476e-17
GO.0009790_EMBRYO_DEVELOPMENT	8.37462e-17
GO.0060047_HEART_CONTRACTION	2.28014e-16
GO.0005544_CALCIUM_DEPENDENT_PHOSPHOLIPID_BINDING	9.33518e-16
GO.0004867_SERINE_TYPE_ENDOPEPTIDASE_INHIBITOR_ACTIVITY	1.51852e-15
GO.0051287_NAD_BINDING	6.44048e-15
GO.0007160_CELL_MATRIX_ADHESION	7.1389e-15
GO.0051258_PROTEIN_POLYMERIZATION	1.18297e-14
GO.0007420_BRAIN_DEVELOPMENT	1.70898e-14
GO.0030529_RIBONUCLEOPROTEIN_COMPLEX	4.2949e-13
GO.0045211_POSTSYNAPTIC_MEMBRANE	7.45467e-13
GO.0045087_INNATE_IMMUNE_RESPONSE	6.35189e-11
GO.0005882_INTERMEDIATE_FILAMENT	7.19462e-10
GO.0007169_TRANSMEMBRANE_RECEPTOR_PROTEIN_TYROSINE_KINASE_SIGNALING_PATHWAY	1.28993e-09
GO.0001525_ANGIOGENESIS	2.66598e-09
GO.0005921_GAP_JUNCTION	4.20334e-07
GO.0004714_TRANSMEMBRANE_RECEPTOR_PROTEIN_TYROSINE_KINASE_ACTIVITY	6.52902e-07
GO.0008201_HEPARIN_BINDING	6.83338e-06
GO.0005922_CONNEXON_COMPLEX	1.15648e-05
GO.0007411_AXON_GUIDANCE	3.02902e-05
GO.0001568_BLOOD_VESSEL_DEVELOPMENT	0.00013978
GO.0051726_REGULATION_OF_CELL_CYCLE	0.00017468
GO.0003779_ACTIN_BINDING	0.000569973
GO.0009986_CELL_SURFACE	0.0081545
GO.0051216_CARTILAGE_DEVELOPMENT	0.0110721
GO.0002040_SPROUTING_ANGIOGENESIS	0.0123362
GO.0005216_ION_CHANNEL_ACTIVITY	0.0813339
GO.0008289_LIPID_BINDING	0.147613
GO.0016491_OXIDOREDUCTASE_ACTIVITY	0.165902
GO.0006811_ION_TRANSPORT	0.231387
GO.0007399_NERVOUS_SYSTEM_DEVELOPMENT	0.265845
GO.0004386_HELICASE_ACTIVITY	1
GO.0005681_SPLICEOSOMAL_COMPLEX	1
GO.0005694_CHROMOSOME	1
GO.0006281_DNA_REPAIR	1
GO.0006396_RNA_PROCESSING	1
GO.0006397_MRNA_PROCESSING	1
GO.0006974_RESPONSE_TO_DNA_DAMAGE_STIMULUS	1
GO.0008026_ATP_DEPENDENT_HELICASE_ACTIVITY	1
GO.0008380_RNA_SPLICING	1
GO.0016607_NUCLEAR_SPECK	1
GO.0042393_HISTONE_BINDING	1
GO.0051301_CELL_DIVISION	1
GO.0000775_CHROMOSOME._CENTROMERIC_REGION	1
GO.0000776_KINETOCHORE	1
GO.0003723_RNA_BINDING	1
GO.0003899_DNA_DIRECTED_RNA_POLYMERASE_ACTIVITY	1
GO.0005643_NUCLEAR_PORE	1
GO.0005689_U12_TYPE_SPLICEOSOMAL_COMPLEX	1
GO.0005730_NUCLEOLUS	1
GO.0006260_DNA_REPLICATION	1
GO.0006357_REGULATION_OF_TRANSCRIPTION_FROM_RNA_POLYMERASE_II_PROMOTER	1
GO.0006367_TRANSCRIPTION_INITIATION_FROM_RNA_POLYMERASE_II_PROMOTER	1
GO.0007049_CELL_CYCLE	1
GO.0007067_MITOSIS	1
GO.0007498_MESODERM_DEVELOPMENT	1
GO.0008033_TRNA_PROCESSING	1
GO.0008094_DNA_DEPENDENT_ATPASE_ACTIVITY	1
GO.0010212_RESPONSE_TO_IONIZING_RADIATION	1
GO.0016568_CHROMATIN_MODIFICATION	1
GO.0016592_MEDIATOR_COMPLEX	1
GO.0051028_MRNA_TRANSPORT	1
GO.0070936_PROTEIN_K48_LINKED_UBIQUITINATION	1
GO.0000079_REGULATION_OF_CYCLIN_DEPENDENT_PROTEIN_KINASE_ACTIVITY	1
GO.0000786_NUCLEOSOME	1
GO.0001756_SOMITOGENESIS	1
GO.0003143_EMBRYONIC_HEART_TUBE_MORPHOGENESIS	1
GO.0003682_CHROMATIN_BINDING	1
GO.0003777_MICROTUBULE_MOTOR_ACTIVITY	1
GO.0006310_DNA_RECOMBINATION	1
GO.0006334_NUCLEOSOME_ASSEMBLY	1
GO.0006366_TRANSCRIPTION_FROM_RNA_POLYMERASE_II_PROMOTER	1
GO.0006417_REGULATION_OF_TRANSLATION	1
GO.0007059_CHROMOSOME_SEGREGATION	1
GO.0008287_PROTEIN_SERINE_THREONINE_PHOSPHATASE_COMPLEX	1
GO.0009880_EMBRYONIC_PATTERN_SPECIFICATION	1
GO.0009952_ANTERIOR_POSTERIOR_PATTERN_FORMATION	1
GO.0009953_DORSAL_VENTRAL_PATTERN_FORMATION	1
GO.0016817_HYDROLASE_ACTIVITY._ACTING_ON_ACID_ANHYDRIDES	1
GO.0030901_MIDBRAIN_DEVELOPMENT	1
GO.0042074_CELL_MIGRATION_INVOLVED_IN_GASTRULATION	1
GO.0042254_RIBOSOME_BIOGENESIS	1
GO.0043049_OTIC_PLACODE_FORMATION	1
GO.0000122_NEGATIVE_REGULATION_OF_TRANSCRIPTION_FROM_RNA_POLYMERASE_II_PROMOTER	1
GO.0000209_PROTEIN_POLYUBIQUITINATION	1
GO.0000785_CHROMATIN	1
GO.0000910_CYTOKINESIS	1
GO.0000922_SPINDLE_POLE	1
GO.0001666_RESPONSE_TO_HYPOXIA	1
GO.0001755_NEURAL_CREST_CELL_MIGRATION	1
GO.0001947_HEART_LOOPING	1
GO.0003007_HEART_MORPHOGENESIS	1
GO.0003714_TRANSCRIPTION_COREPRESSOR_ACTIVITY	1
GO.0003725_DOUBLE_STRANDED_RNA_BINDING	1
GO.0004177_AMINOPEPTIDASE_ACTIVITY	1
GO.0004180_CARBOXYPEPTIDASE_ACTIVITY	1
GO.0004252_SERINE_TYPE_ENDOPEPTIDASE_ACTIVITY	1
GO.0004527_EXONUCLEASE_ACTIVITY	1
GO.0004553_HYDROLASE_ACTIVITY._HYDROLYZING_O_GLYCOSYL_COMPOUNDS	1
GO.0004713_PROTEIN_TYROSINE_KINASE_ACTIVITY	1
GO.0004721_PHOSPHOPROTEIN_PHOSPHATASE_ACTIVITY	1
GO.0004871_SIGNAL_TRANSDUCER_ACTIVITY	1
GO.0004888_TRANSMEMBRANE_RECEPTOR_ACTIVITY	1
GO.0005267_POTASSIUM_CHANNEL_ACTIVITY	1
GO.0005385_ZINC_ION_TRANSMEMBRANE_TRANSPORTER_ACTIVITY	1
GO.0005624_MEMBRANE_FRACTION	1
GO.0005667_TRANSCRIPTION_FACTOR_COMPLEX	1
GO.0005739_MITOCHONDRION	1
GO.0005743_MITOCHONDRIAL_INNER_MEMBRANE	1
GO.0005765_LYSOSOMAL_MEMBRANE	1
GO.0005777_PEROXISOME	1
GO.0005792_MICROSOME	1
GO.0005815_MICROTUBULE_ORGANIZING_CENTER	1
GO.0005819_SPINDLE	1
GO.0005874_MICROTUBULE	1
GO.0005876_SPINDLE_MICROTUBULE	1
GO.0005886_PLASMA_MEMBRANE	1
GO.0006289_NUCLEOTIDE_EXCISION_REPAIR	1
GO.0006414_TRANSLATIONAL_ELONGATION	1
GO.0006457_PROTEIN_FOLDING	1
GO.0006468_PROTEIN_PHOSPHORYLATION	1
GO.0006511_UBIQUITIN_DEPENDENT_PROTEIN_CATABOLIC_PROCESS	1
GO.0006629_LIPID_METABOLIC_PROCESS	1
GO.0006633_FATTY_ACID_BIOSYNTHETIC_PROCESS	1
GO.0006662_GLYCEROL_ETHER_METABOLIC_PROCESS	1
GO.0006730_ONE_CARBON_METABOLIC_PROCESS	1
GO.0006816_CALCIUM_ION_TRANSPORT	1
GO.0006950_RESPONSE_TO_STRESS	1
GO.0006955_IMMUNE_RESPONSE	1
GO.0006979_RESPONSE_TO_OXIDATIVE_STRESS	1
GO.0007017_MICROTUBULE_BASED_PROCESS	1
GO.0007018_MICROTUBULE_BASED_MOVEMENT	1
GO.0007154_CELL_COMMUNICATION	1
GO.0007166_CELL_SURFACE_RECEPTOR_LINKED_SIGNALING_PATHWAY	1
GO.0007179_TRANSFORMING_GROWTH_FACTOR_BETA_RECEPTOR_SIGNALING_PATHWAY	1
GO.0007283_SPERMATOGENESIS	1
GO.0007368_DETERMINATION_OF_LEFT_RIGHT_SYMMETRY	1
GO.0007507_HEART_DEVELOPMENT	1
GO.0008017_MICROTUBULE_BINDING	1
GO.0008022_PROTEIN_C_TERMINUS_BINDING	1
GO.0008134_TRANSCRIPTION_FACTOR_BINDING	1
GO.0008146_SULFOTRANSFERASE_ACTIVITY	1
GO.0008152_METABOLIC_PROCESS	1
GO.0008168_METHYLTRANSFERASE_ACTIVITY	1
GO.0008236_SERINE_TYPE_PEPTIDASE_ACTIVITY	1
GO.0008237_METALLOPEPTIDASE_ACTIVITY	1
GO.0008373_SIALYLTRANSFERASE_ACTIVITY	1
GO.0008610_LIPID_BIOSYNTHETIC_PROCESS	1
GO.0009055_ELECTRON_CARRIER_ACTIVITY	1
GO.0009408_RESPONSE_TO_HEAT	1
GO.0009615_RESPONSE_TO_VIRUS	1
GO.0009897_EXTERNAL_SIDE_OF_PLASMA_MEMBRANE	1
GO.0015662_ATPASE_ACTIVITY._COUPLED_TO_TRANSMEMBRANE_MOVEMENT_OF_IONS._PHOSPHORYLATIVE_MECHANISM	1
GO.0016311_DEPHOSPHORYLATION	1
GO.0016477_CELL_MIGRATION	1
GO.0016605_PML_BODY	1
GO.0016616_OXIDOREDUCTASE_ACTIVITY._ACTING_ON_THE_CH_OH_GROUP_OF_DONORS._NAD_OR_NADP_AS_ACCEPTOR	1
GO.0016702_OXIDOREDUCTASE_ACTIVITY._ACTING_ON_SINGLE_DONORS_WITH_INCORPORATION_OF_MOLECULAR_OXYGEN._INCORPORATION_OF_TWO_ATOMS_OF_OXYGEN	1
GO.0016772_TRANSFERASE_ACTIVITY._TRANSFERRING_PHOSPHORUS_CONTAINING_GROUPS	1
GO.0016779_NUCLEOTIDYLTRANSFERASE_ACTIVITY	1
GO.0016791_PHOSPHATASE_ACTIVITY	1
GO.0016810_HYDROLASE_ACTIVITY._ACTING_ON_CARBON_NITROGEN_.BUT_NOT_PEPTIDE._BONDS	1
GO.0016881_ACID_AMINO_ACID_LIGASE_ACTIVITY	1
GO.0018024_HISTONE_LYSINE_N_METHYLTRANSFERASE_ACTIVITY	1
GO.0019001_GUANYL_NUCLEOTIDE_BINDING	1
GO.0019899_ENZYME_BINDING	1
GO.0019901_PROTEIN_KINASE_BINDING	1
GO.0022857_TRANSMEMBRANE_TRANSPORTER_ACTIVITY	1
GO.0030097_HEMOPOIESIS	1
GO.0030163_PROTEIN_CATABOLIC_PROCESS	1
GO.0030170_PYRIDOXAL_PHOSPHATE_BINDING	1
GO.0030176_INTEGRAL_TO_ENDOPLASMIC_RETICULUM_MEMBRANE	1
GO.0030218_ERYTHROCYTE_DIFFERENTIATION	1
GO.0030308_NEGATIVE_REGULATION_OF_CELL_GROWTH	1
GO.0031016_PANCREAS_DEVELOPMENT	1
GO.0031017_EXOCRINE_PANCREAS_DEVELOPMENT	1
GO.0031101_FIN_REGENERATION	1
GO.0031965_NUCLEAR_MEMBRANE	1
GO.0032313_REGULATION_OF_RAB_GTPASE_ACTIVITY	1
GO.0035091_PHOSPHATIDYLINOSITOL_BINDING	1
GO.0035162_EMBRYONIC_HEMOPOIESIS	1
GO.0040007_GROWTH	1
GO.0042826_HISTONE_DEACETYLASE_BINDING	1
GO.0043010_CAMERA_TYPE_EYE_DEVELOPMENT	1
GO.0043169_CATION_BINDING	1
GO.0043234_PROTEIN_COMPLEX	1
GO.0043966_HISTONE_H3_ACETYLATION	1
GO.0045892_NEGATIVE_REGULATION_OF_TRANSCRIPTION._DNA_DEPENDENT	1
GO.0048514_BLOOD_VESSEL_MORPHOGENESIS	1
GO.0048703_EMBRYONIC_VISCEROCRANIUM_MORPHOGENESIS	1
GO.0048793_PRONEPHROS_DEVELOPMENT	1
GO.0050660_FLAVIN_ADENINE_DINUCLEOTIDE_BINDING	1
GO.0050821_PROTEIN_STABILIZATION	1
GO.0051082_UNFOLDED_PROTEIN_BINDING	1
GO.0051537_2_IRON._2_SULFUR_CLUSTER_BINDING	1
GO.0051539_4_IRON._4_SULFUR_CLUSTER_BINDING	1
GO.0051592_RESPONSE_TO_CALCIUM_ION	1
GO.0055085_TRANSMEMBRANE_TRANSPORT	1
GO.0060026_CONVERGENT_EXTENSION	1
GO.0060028_CONVERGENT_EXTENSION_INVOLVED_IN_AXIS_ELONGATION	1
GO.0070588_CALCIUM_ION_TRANSMEMBRANE_TRANSPORT	1
GO.0071805_POTASSIUM_ION_TRANSMEMBRANE_TRANSPORT	1
GO.0090090_NEGATIVE_REGULATION_OF_CANONICAL_WNT_RECEPTOR_SIGNALING_PATHWAY	1
GO.0001570_VASCULOGENESIS	1
GO.0001764_NEURON_MIGRATION	1
GO.0001889_LIVER_DEVELOPMENT	1
GO.0003684_DAMAGED_DNA_BINDING	1
GO.0003713_TRANSCRIPTION_COACTIVATOR_ACTIVITY	1
GO.0003729_MRNA_BINDING	1
GO.0004221_UBIQUITIN_THIOLESTERASE_ACTIVITY	1
GO.0004672_PROTEIN_KINASE_ACTIVITY	1
GO.0004674_PROTEIN_SERINE_THREONINE_KINASE_ACTIVITY	1
GO.0004722_PROTEIN_SERINE_THREONINE_PHOSPHATASE_ACTIVITY	1
GO.0004842_UBIQUITIN_PROTEIN_LIGASE_ACTIVITY	1
GO.0005506_IRON_ION_BINDING	1
GO.0005507_COPPER_ION_BINDING	1
GO.0005654_NUCLEOPLASM	1
GO.0006418_TRNA_AMINOACYLATION_FOR_PROTEIN_TRANSLATION	1
GO.0006754_ATP_BIOSYNTHETIC_PROCESS	1
GO.0006812_CATION_TRANSPORT	1
GO.0007219_NOTCH_SIGNALING_PATHWAY	1
GO.0007243_INTRACELLULAR_PROTEIN_KINASE_CASCADE	1
GO.0008045_MOTOR_AXON_GUIDANCE	1
GO.0008284_POSITIVE_REGULATION_OF_CELL_PROLIFERATION	1
GO.0016055_WNT_RECEPTOR_SIGNALING_PATHWAY	1
GO.0016705_OXIDOREDUCTASE_ACTIVITY._ACTING_ON_PAIRED_DONORS._WITH_INCORPORATION_OR_REDUCTION_OF_MOLECULAR_OXYGEN	1
GO.0019825_OXYGEN_BINDING	1
GO.0019904_PROTEIN_DOMAIN_SPECIFIC_BINDING	1
GO.0020037_HEME_BINDING	1
GO.0030182_NEURON_DIFFERENTIATION	1
GO.0030917_MIDBRAIN_HINDBRAIN_BOUNDARY_DEVELOPMENT	1
GO.0031290_RETINAL_GANGLION_CELL_AXON_GUIDANCE	1
GO.0031410_CYTOPLASMIC_VESICLE	1
GO.0032259_METHYLATION	1
GO.0042493_RESPONSE_TO_DRUG	1
GO.0045944_POSITIVE_REGULATION_OF_TRANSCRIPTION_FROM_RNA_POLYMERASE_II_PROMOTER	1
GO.0050896_RESPONSE_TO_STIMULUS	1
GO.0060041_RETINA_DEVELOPMENT_IN_CAMERA_TYPE_EYE	1
GO.0000502_PROTEASOME_COMPLEX	1
GO.0003743_TRANSLATION_INITIATION_FACTOR_ACTIVITY	1
GO.0004175_ENDOPEPTIDASE_ACTIVITY	1
GO.0004298_THREONINE_TYPE_ENDOPEPTIDASE_ACTIVITY	1
GO.0004812_AMINOACYL_TRNA_LIGASE_ACTIVITY	1
GO.0005839_PROTEASOME_CORE_COMPLEX	1
GO.0006364_RRNA_PROCESSING	1
GO.0006413_TRANSLATIONAL_INITIATION	1
GO.0007517_MUSCLE_ORGAN_DEVELOPMENT	1
GO.0030900_FOREBRAIN_DEVELOPMENT	1
GO.0030902_HINDBRAIN_DEVELOPMENT	1
GO.0030903_NOTOCHORD_DEVELOPMENT	1
GO.0042221_RESPONSE_TO_CHEMICAL_STIMULUS	1
GO.0051603_PROTEOLYSIS_INVOLVED_IN_CELLULAR_PROTEIN_CATABOLIC_PROCESS	1
GO.0005230_EXTRACELLULAR_LIGAND_GATED_ION_CHANNEL_ACTIVITY	1
GO.0005244_VOLTAGE_GATED_ION_CHANNEL_ACTIVITY	1
GO.0008021_SYNAPTIC_VESICLE	1
GO.0030054_CELL_JUNCTION	1
GO.0034765_REGULATION_OF_ION_TRANSMEMBRANE_TRANSPORT	1
GO.0003707_STEROID_HORMONE_RECEPTOR_ACTIVITY	1
GO.0004497_MONOOXYGENASE_ACTIVITY	1
GO.0004879_LIGAND_DEPENDENT_NUCLEAR_RECEPTOR_ACTIVITY	1
GO.0004896_CYTOKINE_RECEPTOR_ACTIVITY	1
GO.0004930_G_PROTEIN_COUPLED_RECEPTOR_ACTIVITY	1
GO.0005249_VOLTAGE_GATED_POTASSIUM_CHANNEL_ACTIVITY	1
GO.0005887_INTEGRAL_TO_PLASMA_MEMBRANE	1
GO.0006813_POTASSIUM_ION_TRANSPORT	1
GO.0006814_SODIUM_ION_TRANSPORT	1
GO.0006821_CHLORIDE_TRANSPORT	1
GO.0006836_NEUROTRANSMITTER_TRANSPORT	1
GO.0007186_G_PROTEIN_COUPLED_RECEPTOR_PROTEIN_SIGNALING_PATHWAY	1
GO.0007218_NEUROPEPTIDE_SIGNALING_PATHWAY	1
GO.0008076_VOLTAGE_GATED_POTASSIUM_CHANNEL_COMPLEX	1
GO.0008483_TRANSAMINASE_ACTIVITY	1
GO.0015293_SYMPORTER_ACTIVITY	1
GO.0016627_OXIDOREDUCTASE_ACTIVITY._ACTING_ON_THE_CH_CH_GROUP_OF_DONORS	1
GO.0022900_ELECTRON_TRANSPORT_CHAIN	1
GO.0043401_STEROID_HORMONE_MEDIATED_SIGNALING_PATHWAY	1
GO.0055114_OXIDATION_REDUCTION_PROCESS	1

## Sheet: bt.4
x
GO.0001568_BLOOD_VESSEL_DEVELOPMENT	1.59403e-30
GO.0060047_HEART_CONTRACTION	2.1322e-30
GO.0008083_GROWTH_FACTOR_ACTIVITY	2.89281e-27
GO.0007275_MULTICELLULAR_ORGANISMAL_DEVELOPMENT	2.97695e-26
GO.0002040_SPROUTING_ANGIOGENESIS	1.26891e-25
GO.0001525_ANGIOGENESIS	1.72067e-25
GO.0043565_SEQUENCE_SPECIFIC_DNA_BINDING	1.77088e-25
GO.0005747_MITOCHONDRIAL_RESPIRATORY_CHAIN_COMPLEX_I	4.1068e-25
GO.0005615_EXTRACELLULAR_SPACE	1.66119e-23
GO.0006412_TRANSLATION	1.6433e-22
GO.0035162_EMBRYONIC_HEMOPOIESIS	1.45281e-21
GO.0030529_RIBONUCLEOPROTEIN_COMPLEX	1.11533e-20
GO.0007411_AXON_GUIDANCE	1.43521e-20
GO.0005509_CALCIUM_ION_BINDING	1.67486e-20
GO.0015992_PROTON_TRANSPORT	9.19871e-20
GO.0005840_RIBOSOME	1.94135e-19
GO.0005578_PROTEINACEOUS_EXTRACELLULAR_MATRIX	4.26055e-19
GO.0051258_PROTEIN_POLYMERIZATION	5.70746e-19
GO.0007223_WNT_RECEPTOR_SIGNALING_PATHWAY._CALCIUM_MODULATING_PATHWAY	5.77497e-19
GO.0003735_STRUCTURAL_CONSTITUENT_OF_RIBOSOME	5.86058e-19
GO.0031012_EXTRACELLULAR_MATRIX	2.87067e-18
GO.0005507_COPPER_ION_BINDING	3.21358e-18
GO.0005198_STRUCTURAL_MOLECULE_ACTIVITY	3.23428e-18
GO.0022627_CYTOSOLIC_SMALL_RIBOSOMAL_SUBUNIT	3.2723e-18
GO.0005581_COLLAGEN	5.70417e-18
GO.0015986_ATP_SYNTHESIS_COUPLED_PROTON_TRANSPORT	6.74999e-18
GO.0007219_NOTCH_SIGNALING_PATHWAY	5.06928e-16
GO.0019825_OXYGEN_BINDING	5.48626e-16
GO.0046933_HYDROGEN_ION_TRANSPORTING_ATP_SYNTHASE_ACTIVITY._ROTATIONAL_MECHANISM	2.23098e-14
GO.0007179_TRANSFORMING_GROWTH_FACTOR_BETA_RECEPTOR_SIGNALING_PATHWAY	3.82563e-14
GO.0001666_RESPONSE_TO_HYPOXIA	4.61894e-14
GO.0004714_TRANSMEMBRANE_RECEPTOR_PROTEIN_TYROSINE_KINASE_ACTIVITY	6.33783e-13
GO.0005576_EXTRACELLULAR_REGION	4.47897e-11
GO.0005544_CALCIUM_DEPENDENT_PHOSPHOLIPID_BINDING	7.00296e-11
GO.0004129_CYTOCHROME_C_OXIDASE_ACTIVITY	1.33721e-08
GO.0009790_EMBRYO_DEVELOPMENT	2.32792e-08
GO.0005102_RECEPTOR_BINDING	1.18834e-06
GO.0007169_TRANSMEMBRANE_RECEPTOR_PROTEIN_TYROSINE_KINASE_SIGNALING_PATHWAY	4.26362e-06
GO.0015991_ATP_HYDROLYSIS_COUPLED_PROTON_TRANSPORT	1.3648e-05
GO.0008045_MOTOR_AXON_GUIDANCE	1.60912e-05
GO.0006099_TRICARBOXYLIC_ACID_CYCLE	0.000147947
GO.0005044_SCAVENGER_RECEPTOR_ACTIVITY	0.00192384
GO.0003729_MRNA_BINDING	0.00199419
GO.0009055_ELECTRON_CARRIER_ACTIVITY	0.00799969
GO.0001570_VASCULOGENESIS	0.0133232
GO.0003779_ACTIN_BINDING	0.0142085
GO.0007517_MUSCLE_ORGAN_DEVELOPMENT	0.0216222
GO.0007155_CELL_ADHESION	0.0229916
GO.0006096_GLYCOLYSIS	0.0506127
GO.0009986_CELL_SURFACE	0.0619662
GO.0000502_PROTEASOME_COMPLEX	0.171922
GO.0006457_PROTEIN_FOLDING	0.314575
GO.0030218_ERYTHROCYTE_DIFFERENTIATION	0.635605
GO.0004386_HELICASE_ACTIVITY	1
GO.0005681_SPLICEOSOMAL_COMPLEX	1
GO.0005694_CHROMOSOME	1
GO.0006281_DNA_REPAIR	1
GO.0006396_RNA_PROCESSING	1
GO.0006397_MRNA_PROCESSING	1
GO.0006974_RESPONSE_TO_DNA_DAMAGE_STIMULUS	1
GO.0008026_ATP_DEPENDENT_HELICASE_ACTIVITY	1
GO.0008380_RNA_SPLICING	1
GO.0016607_NUCLEAR_SPECK	1
GO.0042393_HISTONE_BINDING	1
GO.0051301_CELL_DIVISION	1
GO.0000775_CHROMOSOME._CENTROMERIC_REGION	1
GO.0000776_KINETOCHORE	1
GO.0003723_RNA_BINDING	1
GO.0003899_DNA_DIRECTED_RNA_POLYMERASE_ACTIVITY	1
GO.0005643_NUCLEAR_PORE	1
GO.0005689_U12_TYPE_SPLICEOSOMAL_COMPLEX	1
GO.0005730_NUCLEOLUS	1
GO.0006260_DNA_REPLICATION	1
GO.0006357_REGULATION_OF_TRANSCRIPTION_FROM_RNA_POLYMERASE_II_PROMOTER	1
GO.0006367_TRANSCRIPTION_INITIATION_FROM_RNA_POLYMERASE_II_PROMOTER	1
GO.0007049_CELL_CYCLE	1
GO.0007067_MITOSIS	1
GO.0007498_MESODERM_DEVELOPMENT	1
GO.0008033_TRNA_PROCESSING	1
GO.0008094_DNA_DEPENDENT_ATPASE_ACTIVITY	1
GO.0010212_RESPONSE_TO_IONIZING_RADIATION	1
GO.0016568_CHROMATIN_MODIFICATION	1
GO.0016592_MEDIATOR_COMPLEX	1
GO.0051028_MRNA_TRANSPORT	1
GO.0070936_PROTEIN_K48_LINKED_UBIQUITINATION	1
GO.0000079_REGULATION_OF_CYCLIN_DEPENDENT_PROTEIN_KINASE_ACTIVITY	1
GO.0000786_NUCLEOSOME	1
GO.0001756_SOMITOGENESIS	1
GO.0003143_EMBRYONIC_HEART_TUBE_MORPHOGENESIS	1
GO.0003682_CHROMATIN_BINDING	1
GO.0003777_MICROTUBULE_MOTOR_ACTIVITY	1
GO.0006310_DNA_RECOMBINATION	1
GO.0006334_NUCLEOSOME_ASSEMBLY	1
GO.0006366_TRANSCRIPTION_FROM_RNA_POLYMERASE_II_PROMOTER	1
GO.0006417_REGULATION_OF_TRANSLATION	1
GO.0007059_CHROMOSOME_SEGREGATION	1
GO.0008287_PROTEIN_SERINE_THREONINE_PHOSPHATASE_COMPLEX	1
GO.0009880_EMBRYONIC_PATTERN_SPECIFICATION	1
GO.0009952_ANTERIOR_POSTERIOR_PATTERN_FORMATION	1
GO.0009953_DORSAL_VENTRAL_PATTERN_FORMATION	1
GO.0016817_HYDROLASE_ACTIVITY._ACTING_ON_ACID_ANHYDRIDES	1
GO.0030901_MIDBRAIN_DEVELOPMENT	1
GO.0042074_CELL_MIGRATION_INVOLVED_IN_GASTRULATION	1
GO.0042254_RIBOSOME_BIOGENESIS	1
GO.0043049_OTIC_PLACODE_FORMATION	1
GO.0000122_NEGATIVE_REGULATION_OF_TRANSCRIPTION_FROM_RNA_POLYMERASE_II_PROMOTER	1
GO.0000209_PROTEIN_POLYUBIQUITINATION	1
GO.0000785_CHROMATIN	1
GO.0000910_CYTOKINESIS	1
GO.0000922_SPINDLE_POLE	1
GO.0001755_NEURAL_CREST_CELL_MIGRATION	1
GO.0001947_HEART_LOOPING	1
GO.0003007_HEART_MORPHOGENESIS	1
GO.0003714_TRANSCRIPTION_COREPRESSOR_ACTIVITY	1
GO.0003725_DOUBLE_STRANDED_RNA_BINDING	1
GO.0004177_AMINOPEPTIDASE_ACTIVITY	1
GO.0004180_CARBOXYPEPTIDASE_ACTIVITY	1
GO.0004252_SERINE_TYPE_ENDOPEPTIDASE_ACTIVITY	1
GO.0004527_EXONUCLEASE_ACTIVITY	1
GO.0004553_HYDROLASE_ACTIVITY._HYDROLYZING_O_GLYCOSYL_COMPOUNDS	1
GO.0004713_PROTEIN_TYROSINE_KINASE_ACTIVITY	1
GO.0004721_PHOSPHOPROTEIN_PHOSPHATASE_ACTIVITY	1
GO.0004871_SIGNAL_TRANSDUCER_ACTIVITY	1
GO.0004888_TRANSMEMBRANE_RECEPTOR_ACTIVITY	1
GO.0005267_POTASSIUM_CHANNEL_ACTIVITY	1
GO.0005385_ZINC_ION_TRANSMEMBRANE_TRANSPORTER_ACTIVITY	1
GO.0005624_MEMBRANE_FRACTION	1
GO.0005667_TRANSCRIPTION_FACTOR_COMPLEX	1
GO.0005739_MITOCHONDRION	1
GO.0005743_MITOCHONDRIAL_INNER_MEMBRANE	1
GO.0005765_LYSOSOMAL_MEMBRANE	1
GO.0005777_PEROXISOME	1
GO.0005792_MICROSOME	1
GO.0005815_MICROTUBULE_ORGANIZING_CENTER	1
GO.0005819_SPINDLE	1
GO.0005874_MICROTUBULE	1
GO.0005876_SPINDLE_MICROTUBULE	1
GO.0005886_PLASMA_MEMBRANE	1
GO.0005921_GAP_JUNCTION	1
GO.0005922_CONNEXON_COMPLEX	1
GO.0006289_NUCLEOTIDE_EXCISION_REPAIR	1
GO.0006414_TRANSLATIONAL_ELONGATION	1
GO.0006468_PROTEIN_PHOSPHORYLATION	1
GO.0006511_UBIQUITIN_DEPENDENT_PROTEIN_CATABOLIC_PROCESS	1
GO.0006629_LIPID_METABOLIC_PROCESS	1
GO.0006633_FATTY_ACID_BIOSYNTHETIC_PROCESS	1
GO.0006662_GLYCEROL_ETHER_METABOLIC_PROCESS	1
GO.0006730_ONE_CARBON_METABOLIC_PROCESS	1
GO.0006816_CALCIUM_ION_TRANSPORT	1
GO.0006950_RESPONSE_TO_STRESS	1
GO.0006955_IMMUNE_RESPONSE	1
GO.0006979_RESPONSE_TO_OXIDATIVE_STRESS	1
GO.0007017_MICROTUBULE_BASED_PROCESS	1
GO.0007018_MICROTUBULE_BASED_MOVEMENT	1
GO.0007154_CELL_COMMUNICATION	1
GO.0007160_CELL_MATRIX_ADHESION	1
GO.0007166_CELL_SURFACE_RECEPTOR_LINKED_SIGNALING_PATHWAY	1
GO.0007283_SPERMATOGENESIS	1
GO.0007368_DETERMINATION_OF_LEFT_RIGHT_SYMMETRY	1
GO.0007399_NERVOUS_SYSTEM_DEVELOPMENT	1
GO.0007507_HEART_DEVELOPMENT	1
GO.0008017_MICROTUBULE_BINDING	1
GO.0008022_PROTEIN_C_TERMINUS_BINDING	1
GO.0008134_TRANSCRIPTION_FACTOR_BINDING	1
GO.0008146_SULFOTRANSFERASE_ACTIVITY	1
GO.0008152_METABOLIC_PROCESS	1
GO.0008168_METHYLTRANSFERASE_ACTIVITY	1
GO.0008201_HEPARIN_BINDING	1
GO.0008236_SERINE_TYPE_PEPTIDASE_ACTIVITY	1
GO.0008237_METALLOPEPTIDASE_ACTIVITY	1
GO.0008373_SIALYLTRANSFERASE_ACTIVITY	1
GO.0008610_LIPID_BIOSYNTHETIC_PROCESS	1
GO.0009408_RESPONSE_TO_HEAT	1
GO.0009615_RESPONSE_TO_VIRUS	1
GO.0009897_EXTERNAL_SIDE_OF_PLASMA_MEMBRANE	1
GO.0015662_ATPASE_ACTIVITY._COUPLED_TO_TRANSMEMBRANE_MOVEMENT_OF_IONS._PHOSPHORYLATIVE_MECHANISM	1
GO.0016311_DEPHOSPHORYLATION	1
GO.0016477_CELL_MIGRATION	1
GO.0016605_PML_BODY	1
GO.0016616_OXIDOREDUCTASE_ACTIVITY._ACTING_ON_THE_CH_OH_GROUP_OF_DONORS._NAD_OR_NADP_AS_ACCEPTOR	1
GO.0016702_OXIDOREDUCTASE_ACTIVITY._ACTING_ON_SINGLE_DONORS_WITH_INCORPORATION_OF_MOLECULAR_OXYGEN._INCORPORATION_OF_TWO_ATOMS_OF_OXYGEN	1
GO.0016772_TRANSFERASE_ACTIVITY._TRANSFERRING_PHOSPHORUS_CONTAINING_GROUPS	1
GO.0016779_NUCLEOTIDYLTRANSFERASE_ACTIVITY	1
GO.0016791_PHOSPHATASE_ACTIVITY	1
GO.0016810_HYDROLASE_ACTIVITY._ACTING_ON_CARBON_NITROGEN_.BUT_NOT_PEPTIDE._BONDS	1
GO.0016881_ACID_AMINO_ACID_LIGASE_ACTIVITY	1
GO.0018024_HISTONE_LYSINE_N_METHYLTRANSFERASE_ACTIVITY	1
GO.0019001_GUANYL_NUCLEOTIDE_BINDING	1
GO.0019899_ENZYME_BINDING	1
GO.0019901_PROTEIN_KINASE_BINDING	1
GO.0022857_TRANSMEMBRANE_TRANSPORTER_ACTIVITY	1
GO.0030097_HEMOPOIESIS	1
GO.0030163_PROTEIN_CATABOLIC_PROCESS	1
GO.0030170_PYRIDOXAL_PHOSPHATE_BINDING	1
GO.0030176_INTEGRAL_TO_ENDOPLASMIC_RETICULUM_MEMBRANE	1
GO.0030308_NEGATIVE_REGULATION_OF_CELL_GROWTH	1
GO.0031016_PANCREAS_DEVELOPMENT	1
GO.0031017_EXOCRINE_PANCREAS_DEVELOPMENT	1
GO.0031101_FIN_REGENERATION	1
GO.0031965_NUCLEAR_MEMBRANE	1
GO.0032313_REGULATION_OF_RAB_GTPASE_ACTIVITY	1
GO.0035091_PHOSPHATIDYLINOSITOL_BINDING	1
GO.0040007_GROWTH	1
GO.0042826_HISTONE_DEACETYLASE_BINDING	1
GO.0043010_CAMERA_TYPE_EYE_DEVELOPMENT	1
GO.0043169_CATION_BINDING	1
GO.0043234_PROTEIN_COMPLEX	1
GO.0043966_HISTONE_H3_ACETYLATION	1
GO.0045087_INNATE_IMMUNE_RESPONSE	1
GO.0045892_NEGATIVE_REGULATION_OF_TRANSCRIPTION._DNA_DEPENDENT	1
GO.0048514_BLOOD_VESSEL_MORPHOGENESIS	1
GO.0048703_EMBRYONIC_VISCEROCRANIUM_MORPHOGENESIS	1
GO.0048793_PRONEPHROS_DEVELOPMENT	1
GO.0050660_FLAVIN_ADENINE_DINUCLEOTIDE_BINDING	1
GO.0050821_PROTEIN_STABILIZATION	1
GO.0051082_UNFOLDED_PROTEIN_BINDING	1
GO.0051216_CARTILAGE_DEVELOPMENT	1
GO.0051537_2_IRON._2_SULFUR_CLUSTER_BINDING	1
GO.0051539_4_IRON._4_SULFUR_CLUSTER_BINDING	1
GO.0051592_RESPONSE_TO_CALCIUM_ION	1
GO.0051726_REGULATION_OF_CELL_CYCLE	1
GO.0055085_TRANSMEMBRANE_TRANSPORT	1
GO.0060026_CONVERGENT_EXTENSION	1
GO.0060028_CONVERGENT_EXTENSION_INVOLVED_IN_AXIS_ELONGATION	1
GO.0070588_CALCIUM_ION_TRANSMEMBRANE_TRANSPORT	1
GO.0071805_POTASSIUM_ION_TRANSMEMBRANE_TRANSPORT	1
GO.0090090_NEGATIVE_REGULATION_OF_CANONICAL_WNT_RECEPTOR_SIGNALING_PATHWAY	1
GO.0001764_NEURON_MIGRATION	1
GO.0001889_LIVER_DEVELOPMENT	1
GO.0003684_DAMAGED_DNA_BINDING	1
GO.0003713_TRANSCRIPTION_COACTIVATOR_ACTIVITY	1
GO.0004221_UBIQUITIN_THIOLESTERASE_ACTIVITY	1
GO.0004672_PROTEIN_KINASE_ACTIVITY	1
GO.0004674_PROTEIN_SERINE_THREONINE_KINASE_ACTIVITY	1
GO.0004722_PROTEIN_SERINE_THREONINE_PHOSPHATASE_ACTIVITY	1
GO.0004842_UBIQUITIN_PROTEIN_LIGASE_ACTIVITY	1
GO.0005506_IRON_ION_BINDING	1
GO.0005654_NUCLEOPLASM	1
GO.0006418_TRNA_AMINOACYLATION_FOR_PROTEIN_TRANSLATION	1
GO.0006754_ATP_BIOSYNTHETIC_PROCESS	1
GO.0006812_CATION_TRANSPORT	1
GO.0007229_INTEGRIN_MEDIATED_SIGNALING_PATHWAY	1
GO.0007243_INTRACELLULAR_PROTEIN_KINASE_CASCADE	1
GO.0007420_BRAIN_DEVELOPMENT	1
GO.0007596_BLOOD_COAGULATION	1
GO.0008284_POSITIVE_REGULATION_OF_CELL_PROLIFERATION	1
GO.0008305_INTEGRIN_COMPLEX	1
GO.0016055_WNT_RECEPTOR_SIGNALING_PATHWAY	1
GO.0016705_OXIDOREDUCTASE_ACTIVITY._ACTING_ON_PAIRED_DONORS._WITH_INCORPORATION_OR_REDUCTION_OF_MOLECULAR_OXYGEN	1
GO.0019904_PROTEIN_DOMAIN_SPECIFIC_BINDING	1
GO.0020037_HEME_BINDING	1
GO.0030182_NEURON_DIFFERENTIATION	1
GO.0030917_MIDBRAIN_HINDBRAIN_BOUNDARY_DEVELOPMENT	1
GO.0031290_RETINAL_GANGLION_CELL_AXON_GUIDANCE	1
GO.0031410_CYTOPLASMIC_VESICLE	1
GO.0032259_METHYLATION	1
GO.0042493_RESPONSE_TO_DRUG	1
GO.0045944_POSITIVE_REGULATION_OF_TRANSCRIPTION_FROM_RNA_POLYMERASE_II_PROMOTER	1
GO.0050896_RESPONSE_TO_STIMULUS	1
GO.0051287_NAD_BINDING	1
GO.0060041_RETINA_DEVELOPMENT_IN_CAMERA_TYPE_EYE	1
GO.0003743_TRANSLATION_INITIATION_FACTOR_ACTIVITY	1
GO.0004175_ENDOPEPTIDASE_ACTIVITY	1
GO.0004298_THREONINE_TYPE_ENDOPEPTIDASE_ACTIVITY	1
GO.0004812_AMINOACYL_TRNA_LIGASE_ACTIVITY	1
GO.0005839_PROTEASOME_CORE_COMPLEX	1
GO.0006364_RRNA_PROCESSING	1
GO.0006413_TRANSLATIONAL_INITIATION	1
GO.0030900_FOREBRAIN_DEVELOPMENT	1
GO.0030902_HINDBRAIN_DEVELOPMENT	1
GO.0030903_NOTOCHORD_DEVELOPMENT	1
GO.0042221_RESPONSE_TO_CHEMICAL_STIMULUS	1
GO.0051603_PROTEOLYSIS_INVOLVED_IN_CELLULAR_PROTEIN_CATABOLIC_PROCESS	1
GO.0005215_TRANSPORTER_ACTIVITY	1
GO.0007601_VISUAL_PERCEPTION	1
GO.0045202_SYNAPSE	1
GO.0001558_REGULATION_OF_CELL_GROWTH	1
GO.0004867_SERINE_TYPE_ENDOPEPTIDASE_INHIBITOR_ACTIVITY	1
GO.0005179_HORMONE_ACTIVITY	1
GO.0005216_ION_CHANNEL_ACTIVITY	1
GO.0005230_EXTRACELLULAR_LIGAND_GATED_ION_CHANNEL_ACTIVITY	1
GO.0005244_VOLTAGE_GATED_ION_CHANNEL_ACTIVITY	1
GO.0005520_INSULIN_LIKE_GROWTH_FACTOR_BINDING	1
GO.0005882_INTERMEDIATE_FILAMENT	1
GO.0006811_ION_TRANSPORT	1
GO.0007156_HOMOPHILIC_CELL_ADHESION	1
GO.0008021_SYNAPTIC_VESICLE	1
GO.0015078_HYDROGEN_ION_TRANSMEMBRANE_TRANSPORTER_ACTIVITY	1
GO.0030054_CELL_JUNCTION	1
GO.0034765_REGULATION_OF_ION_TRANSMEMBRANE_TRANSPORT	1
GO.0045211_POSTSYNAPTIC_MEMBRANE	1
GO.0003707_STEROID_HORMONE_RECEPTOR_ACTIVITY	1
GO.0004497_MONOOXYGENASE_ACTIVITY	1
GO.0004879_LIGAND_DEPENDENT_NUCLEAR_RECEPTOR_ACTIVITY	1
GO.0004896_CYTOKINE_RECEPTOR_ACTIVITY	1
GO.0004930_G_PROTEIN_COUPLED_RECEPTOR_ACTIVITY	1
GO.0005249_VOLTAGE_GATED_POTASSIUM_CHANNEL_ACTIVITY	1
GO.0005887_INTEGRAL_TO_PLASMA_MEMBRANE	1
GO.0006813_POTASSIUM_ION_TRANSPORT	1
GO.0006814_SODIUM_ION_TRANSPORT	1
GO.0006821_CHLORIDE_TRANSPORT	1
GO.0006836_NEUROTRANSMITTER_TRANSPORT	1
GO.0007186_G_PROTEIN_COUPLED_RECEPTOR_PROTEIN_SIGNALING_PATHWAY	1
GO.0007218_NEUROPEPTIDE_SIGNALING_PATHWAY	1
GO.0008076_VOLTAGE_GATED_POTASSIUM_CHANNEL_COMPLEX	1
GO.0008289_LIPID_BINDING	1
GO.0008483_TRANSAMINASE_ACTIVITY	1
GO.0015293_SYMPORTER_ACTIVITY	1
GO.0016491_OXIDOREDUCTASE_ACTIVITY	1
GO.0016627_OXIDOREDUCTASE_ACTIVITY._ACTING_ON_THE_CH_CH_GROUP_OF_DONORS	1
GO.0022900_ELECTRON_TRANSPORT_CHAIN	1
GO.0043401_STEROID_HORMONE_MEDIATED_SIGNALING_PATHWAY	1
GO.0055114_OXIDATION_REDUCTION_PROCESS	1

## Sheet: bt.5
x
GO.0000502_PROTEASOME_COMPLEX	4.37389e-60
GO.0007517_MUSCLE_ORGAN_DEVELOPMENT	4.1901e-56
GO.0030529_RIBONUCLEOPROTEIN_COMPLEX	2.98507e-47
GO.0006412_TRANSLATION	9.14116e-41
GO.0005839_PROTEASOME_CORE_COMPLEX	7.63779e-40
GO.0004175_ENDOPEPTIDASE_ACTIVITY	2.95513e-39
GO.0004298_THREONINE_TYPE_ENDOPEPTIDASE_ACTIVITY	9.69905e-39
GO.0030900_FOREBRAIN_DEVELOPMENT	7.5875e-38
GO.0030902_HINDBRAIN_DEVELOPMENT	3.11844e-37
GO.0051603_PROTEOLYSIS_INVOLVED_IN_CELLULAR_PROTEIN_CATABOLIC_PROCESS	7.68677e-36
GO.0042221_RESPONSE_TO_CHEMICAL_STIMULUS	4.56695e-32
GO.0003735_STRUCTURAL_CONSTITUENT_OF_RIBOSOME	1.42745e-30
GO.0007411_AXON_GUIDANCE	3.88457e-30
GO.0007275_MULTICELLULAR_ORGANISMAL_DEVELOPMENT	1.98763e-28
GO.0005840_RIBOSOME	3.7952e-28
GO.0004812_AMINOACYL_TRNA_LIGASE_ACTIVITY	4.44525e-28
GO.0008045_MOTOR_AXON_GUIDANCE	6.79327e-25
GO.0030182_NEURON_DIFFERENTIATION	8.31428e-25
GO.0003743_TRANSLATION_INITIATION_FACTOR_ACTIVITY	4.03532e-23
GO.0022627_CYTOSOLIC_SMALL_RIBOSOMAL_SUBUNIT	8.09352e-23
GO.0043565_SEQUENCE_SPECIFIC_DNA_BINDING	6.36634e-22
GO.0006413_TRANSLATIONAL_INITIATION	1.28003e-21
GO.0030903_NOTOCHORD_DEVELOPMENT	3.26292e-20
GO.0043049_OTIC_PLACODE_FORMATION	7.52266e-20
GO.0001570_VASCULOGENESIS	4.59904e-17
GO.0006418_TRNA_AMINOACYLATION_FOR_PROTEIN_TRANSLATION	6.97943e-17
GO.0007223_WNT_RECEPTOR_SIGNALING_PATHWAY._CALCIUM_MODULATING_PATHWAY	9.71857e-17
GO.0043010_CAMERA_TYPE_EYE_DEVELOPMENT	9.79607e-17
GO.0019904_PROTEIN_DOMAIN_SPECIFIC_BINDING	1.88484e-14
GO.0001889_LIVER_DEVELOPMENT	2.31531e-11
GO.0008284_POSITIVE_REGULATION_OF_CELL_PROLIFERATION	5.73158e-11
GO.0009952_ANTERIOR_POSTERIOR_PATTERN_FORMATION	1.63906e-10
GO.0007219_NOTCH_SIGNALING_PATHWAY	3.33762e-10
GO.0031290_RETINAL_GANGLION_CELL_AXON_GUIDANCE	7.08439e-10
GO.0048703_EMBRYONIC_VISCEROCRANIUM_MORPHOGENESIS	7.16137e-10
GO.0006364_RRNA_PROCESSING	7.46103e-10
GO.0000122_NEGATIVE_REGULATION_OF_TRANSCRIPTION_FROM_RNA_POLYMERASE_II_PROMOTER	5.72948e-09
GO.0009986_CELL_SURFACE	8.01229e-09
GO.0030901_MIDBRAIN_DEVELOPMENT	1.02261e-08
GO.0060047_HEART_CONTRACTION	9.98298e-08
GO.0007166_CELL_SURFACE_RECEPTOR_LINKED_SIGNALING_PATHWAY	4.04064e-07
GO.0006457_PROTEIN_FOLDING	1.14963e-06
GO.0016705_OXIDOREDUCTASE_ACTIVITY._ACTING_ON_PAIRED_DONORS._WITH_INCORPORATION_OR_REDUCTION_OF_MOLECULAR_OXYGEN	1.98929e-05
GO.0007169_TRANSMEMBRANE_RECEPTOR_PROTEIN_TYROSINE_KINASE_SIGNALING_PATHWAY	5.09828e-05
GO.0035162_EMBRYONIC_HEMOPOIESIS	0.000948853
GO.0004714_TRANSMEMBRANE_RECEPTOR_PROTEIN_TYROSINE_KINASE_ACTIVITY	0.00107584
GO.0042254_RIBOSOME_BIOGENESIS	0.00113245
GO.0001756_SOMITOGENESIS	0.0136516
GO.0045944_POSITIVE_REGULATION_OF_TRANSCRIPTION_FROM_RNA_POLYMERASE_II_PROMOTER	0.0176582
GO.0051258_PROTEIN_POLYMERIZATION	0.0176582
GO.0001525_ANGIOGENESIS	0.0255288
GO.0001568_BLOOD_VESSEL_DEVELOPMENT	0.0572821
GO.0009953_DORSAL_VENTRAL_PATTERN_FORMATION	0.0606058
GO.0030163_PROTEIN_CATABOLIC_PROCESS	0.0801762
GO.0005730_NUCLEOLUS	0.257449
GO.0009790_EMBRYO_DEVELOPMENT	0.319881
GO.0019825_OXYGEN_BINDING	0.32622
GO.0015992_PROTON_TRANSPORT	0.360403
GO.0005578_PROTEINACEOUS_EXTRACELLULAR_MATRIX	0.394479
GO.0007420_BRAIN_DEVELOPMENT	0.56471
GO.0005509_CALCIUM_ION_BINDING	0.897415
GO.0004386_HELICASE_ACTIVITY	1
GO.0005681_SPLICEOSOMAL_COMPLEX	1
GO.0005694_CHROMOSOME	1
GO.0006281_DNA_REPAIR	1
GO.0006396_RNA_PROCESSING	1
GO.0006397_MRNA_PROCESSING	1
GO.0006974_RESPONSE_TO_DNA_DAMAGE_STIMULUS	1
GO.0008026_ATP_DEPENDENT_HELICASE_ACTIVITY	1
GO.0008380_RNA_SPLICING	1
GO.0016607_NUCLEAR_SPECK	1
GO.0042393_HISTONE_BINDING	1
GO.0051301_CELL_DIVISION	1
GO.0000775_CHROMOSOME._CENTROMERIC_REGION	1
GO.0000776_KINETOCHORE	1
GO.0003723_RNA_BINDING	1
GO.0003899_DNA_DIRECTED_RNA_POLYMERASE_ACTIVITY	1
GO.0005643_NUCLEAR_PORE	1
GO.0005689_U12_TYPE_SPLICEOSOMAL_COMPLEX	1
GO.0006260_DNA_REPLICATION	1
GO.0006357_REGULATION_OF_TRANSCRIPTION_FROM_RNA_POLYMERASE_II_PROMOTER	1
GO.0006367_TRANSCRIPTION_INITIATION_FROM_RNA_POLYMERASE_II_PROMOTER	1
GO.0007049_CELL_CYCLE	1
GO.0007067_MITOSIS	1
GO.0007498_MESODERM_DEVELOPMENT	1
GO.0008033_TRNA_PROCESSING	1
GO.0008094_DNA_DEPENDENT_ATPASE_ACTIVITY	1
GO.0010212_RESPONSE_TO_IONIZING_RADIATION	1
GO.0016568_CHROMATIN_MODIFICATION	1
GO.0016592_MEDIATOR_COMPLEX	1
GO.0051028_MRNA_TRANSPORT	1
GO.0070936_PROTEIN_K48_LINKED_UBIQUITINATION	1
GO.0000079_REGULATION_OF_CYCLIN_DEPENDENT_PROTEIN_KINASE_ACTIVITY	1
GO.0000786_NUCLEOSOME	1
GO.0003143_EMBRYONIC_HEART_TUBE_MORPHOGENESIS	1
GO.0003682_CHROMATIN_BINDING	1
GO.0003777_MICROTUBULE_MOTOR_ACTIVITY	1
GO.0006310_DNA_RECOMBINATION	1
GO.0006334_NUCLEOSOME_ASSEMBLY	1
GO.0006366_TRANSCRIPTION_FROM_RNA_POLYMERASE_II_PROMOTER	1
GO.0006417_REGULATION_OF_TRANSLATION	1
GO.0007059_CHROMOSOME_SEGREGATION	1
GO.0008287_PROTEIN_SERINE_THREONINE_PHOSPHATASE_COMPLEX	1
GO.0009880_EMBRYONIC_PATTERN_SPECIFICATION	1
GO.0016817_HYDROLASE_ACTIVITY._ACTING_ON_ACID_ANHYDRIDES	1
GO.0042074_CELL_MIGRATION_INVOLVED_IN_GASTRULATION	1
GO.0000209_PROTEIN_POLYUBIQUITINATION	1
GO.0000785_CHROMATIN	1
GO.0000910_CYTOKINESIS	1
GO.0000922_SPINDLE_POLE	1
GO.0001666_RESPONSE_TO_HYPOXIA	1
GO.0001755_NEURAL_CREST_CELL_MIGRATION	1
GO.0001947_HEART_LOOPING	1
GO.0003007_HEART_MORPHOGENESIS	1
GO.0003714_TRANSCRIPTION_COREPRESSOR_ACTIVITY	1
GO.0003725_DOUBLE_STRANDED_RNA_BINDING	1
GO.0003779_ACTIN_BINDING	1
GO.0004177_AMINOPEPTIDASE_ACTIVITY	1
GO.0004180_CARBOXYPEPTIDASE_ACTIVITY	1
GO.0004252_SERINE_TYPE_ENDOPEPTIDASE_ACTIVITY	1
GO.0004527_EXONUCLEASE_ACTIVITY	1
GO.0004553_HYDROLASE_ACTIVITY._HYDROLYZING_O_GLYCOSYL_COMPOUNDS	1
GO.0004713_PROTEIN_TYROSINE_KINASE_ACTIVITY	1
GO.0004721_PHOSPHOPROTEIN_PHOSPHATASE_ACTIVITY	1
GO.0004871_SIGNAL_TRANSDUCER_ACTIVITY	1
GO.0004888_TRANSMEMBRANE_RECEPTOR_ACTIVITY	1
GO.0005102_RECEPTOR_BINDING	1
GO.0005267_POTASSIUM_CHANNEL_ACTIVITY	1
GO.0005385_ZINC_ION_TRANSMEMBRANE_TRANSPORTER_ACTIVITY	1
GO.0005624_MEMBRANE_FRACTION	1
GO.0005667_TRANSCRIPTION_FACTOR_COMPLEX	1
GO.0005739_MITOCHONDRION	1
GO.0005743_MITOCHONDRIAL_INNER_MEMBRANE	1
GO.0005765_LYSOSOMAL_MEMBRANE	1
GO.0005777_PEROXISOME	1
GO.0005792_MICROSOME	1
GO.0005815_MICROTUBULE_ORGANIZING_CENTER	1
GO.0005819_SPINDLE	1
GO.0005874_MICROTUBULE	1
GO.0005876_SPINDLE_MICROTUBULE	1
GO.0005886_PLASMA_MEMBRANE	1
GO.0005921_GAP_JUNCTION	1
GO.0005922_CONNEXON_COMPLEX	1
GO.0006289_NUCLEOTIDE_EXCISION_REPAIR	1
GO.0006414_TRANSLATIONAL_ELONGATION	1
GO.0006468_PROTEIN_PHOSPHORYLATION	1
GO.0006511_UBIQUITIN_DEPENDENT_PROTEIN_CATABOLIC_PROCESS	1
GO.0006629_LIPID_METABOLIC_PROCESS	1
GO.0006633_FATTY_ACID_BIOSYNTHETIC_PROCESS	1
GO.0006662_GLYCEROL_ETHER_METABOLIC_PROCESS	1
GO.0006730_ONE_CARBON_METABOLIC_PROCESS	1
GO.0006816_CALCIUM_ION_TRANSPORT	1
GO.0006950_RESPONSE_TO_STRESS	1
GO.0006955_IMMUNE_RESPONSE	1
GO.0006979_RESPONSE_TO_OXIDATIVE_STRESS	1
GO.0007017_MICROTUBULE_BASED_PROCESS	1
GO.0007018_MICROTUBULE_BASED_MOVEMENT	1
GO.0007154_CELL_COMMUNICATION	1
GO.0007160_CELL_MATRIX_ADHESION	1
GO.0007179_TRANSFORMING_GROWTH_FACTOR_BETA_RECEPTOR_SIGNALING_PATHWAY	1
GO.0007283_SPERMATOGENESIS	1
GO.0007368_DETERMINATION_OF_LEFT_RIGHT_SYMMETRY	1
GO.0007399_NERVOUS_SYSTEM_DEVELOPMENT	1
GO.0007507_HEART_DEVELOPMENT	1
GO.0008017_MICROTUBULE_BINDING	1
GO.0008022_PROTEIN_C_TERMINUS_BINDING	1
GO.0008134_TRANSCRIPTION_FACTOR_BINDING	1
GO.0008146_SULFOTRANSFERASE_ACTIVITY	1
GO.0008152_METABOLIC_PROCESS	1
GO.0008168_METHYLTRANSFERASE_ACTIVITY	1
GO.0008201_HEPARIN_BINDING	1
GO.0008236_SERINE_TYPE_PEPTIDASE_ACTIVITY	1
GO.0008237_METALLOPEPTIDASE_ACTIVITY	1
GO.0008373_SIALYLTRANSFERASE_ACTIVITY	1
GO.0008610_LIPID_BIOSYNTHETIC_PROCESS	1
GO.0009055_ELECTRON_CARRIER_ACTIVITY	1
GO.0009408_RESPONSE_TO_HEAT	1
GO.0009615_RESPONSE_TO_VIRUS	1
GO.0009897_EXTERNAL_SIDE_OF_PLASMA_MEMBRANE	1
GO.0015662_ATPASE_ACTIVITY._COUPLED_TO_TRANSMEMBRANE_MOVEMENT_OF_IONS._PHOSPHORYLATIVE_MECHANISM	1
GO.0016311_DEPHOSPHORYLATION	1
GO.0016477_CELL_MIGRATION	1
GO.0016605_PML_BODY	1
GO.0016616_OXIDOREDUCTASE_ACTIVITY._ACTING_ON_THE_CH_OH_GROUP_OF_DONORS._NAD_OR_NADP_AS_ACCEPTOR	1
GO.0016702_OXIDOREDUCTASE_ACTIVITY._ACTING_ON_SINGLE_DONORS_WITH_INCORPORATION_OF_MOLECULAR_OXYGEN._INCORPORATION_OF_TWO_ATOMS_OF_OXYGEN	1
GO.0016772_TRANSFERASE_ACTIVITY._TRANSFERRING_PHOSPHORUS_CONTAINING_GROUPS	1
GO.0016779_NUCLEOTIDYLTRANSFERASE_ACTIVITY	1
GO.0016791_PHOSPHATASE_ACTIVITY	1
GO.0016810_HYDROLASE_ACTIVITY._ACTING_ON_CARBON_NITROGEN_.BUT_NOT_PEPTIDE._BONDS	1
GO.0016881_ACID_AMINO_ACID_LIGASE_ACTIVITY	1
GO.0018024_HISTONE_LYSINE_N_METHYLTRANSFERASE_ACTIVITY	1
GO.0019001_GUANYL_NUCLEOTIDE_BINDING	1
GO.0019899_ENZYME_BINDING	1
GO.0019901_PROTEIN_KINASE_BINDING	1
GO.0022857_TRANSMEMBRANE_TRANSPORTER_ACTIVITY	1
GO.0030097_HEMOPOIESIS	1
GO.0030170_PYRIDOXAL_PHOSPHATE_BINDING	1
GO.0030176_INTEGRAL_TO_ENDOPLASMIC_RETICULUM_MEMBRANE	1
GO.0030218_ERYTHROCYTE_DIFFERENTIATION	1
GO.0030308_NEGATIVE_REGULATION_OF_CELL_GROWTH	1
GO.0031016_PANCREAS_DEVELOPMENT	1
GO.0031017_EXOCRINE_PANCREAS_DEVELOPMENT	1
GO.0031101_FIN_REGENERATION	1
GO.0031965_NUCLEAR_MEMBRANE	1
GO.0032313_REGULATION_OF_RAB_GTPASE_ACTIVITY	1
GO.0035091_PHOSPHATIDYLINOSITOL_BINDING	1
GO.0040007_GROWTH	1
GO.0042826_HISTONE_DEACETYLASE_BINDING	1
GO.0043169_CATION_BINDING	1
GO.0043234_PROTEIN_COMPLEX	1
GO.0043966_HISTONE_H3_ACETYLATION	1
GO.0045087_INNATE_IMMUNE_RESPONSE	1
GO.0045892_NEGATIVE_REGULATION_OF_TRANSCRIPTION._DNA_DEPENDENT	1
GO.0048514_BLOOD_VESSEL_MORPHOGENESIS	1
GO.0048793_PRONEPHROS_DEVELOPMENT	1
GO.0050660_FLAVIN_ADENINE_DINUCLEOTIDE_BINDING	1
GO.0050821_PROTEIN_STABILIZATION	1
GO.0051082_UNFOLDED_PROTEIN_BINDING	1
GO.0051216_CARTILAGE_DEVELOPMENT	1
GO.0051537_2_IRON._2_SULFUR_CLUSTER_BINDING	1
GO.0051539_4_IRON._4_SULFUR_CLUSTER_BINDING	1
GO.0051592_RESPONSE_TO_CALCIUM_ION	1
GO.0051726_REGULATION_OF_CELL_CYCLE	1
GO.0055085_TRANSMEMBRANE_TRANSPORT	1
GO.0060026_CONVERGENT_EXTENSION	1
GO.0060028_CONVERGENT_EXTENSION_INVOLVED_IN_AXIS_ELONGATION	1
GO.0070588_CALCIUM_ION_TRANSMEMBRANE_TRANSPORT	1
GO.0071805_POTASSIUM_ION_TRANSMEMBRANE_TRANSPORT	1
GO.0090090_NEGATIVE_REGULATION_OF_CANONICAL_WNT_RECEPTOR_SIGNALING_PATHWAY	1
GO.0001764_NEURON_MIGRATION	1
GO.0002040_SPROUTING_ANGIOGENESIS	1
GO.0003684_DAMAGED_DNA_BINDING	1
GO.0003713_TRANSCRIPTION_COACTIVATOR_ACTIVITY	1
GO.0003729_MRNA_BINDING	1
GO.0004221_UBIQUITIN_THIOLESTERASE_ACTIVITY	1
GO.0004672_PROTEIN_KINASE_ACTIVITY	1
GO.0004674_PROTEIN_SERINE_THREONINE_KINASE_ACTIVITY	1
GO.0004722_PROTEIN_SERINE_THREONINE_PHOSPHATASE_ACTIVITY	1
GO.0004842_UBIQUITIN_PROTEIN_LIGASE_ACTIVITY	1
GO.0005044_SCAVENGER_RECEPTOR_ACTIVITY	1
GO.0005506_IRON_ION_BINDING	1
GO.0005507_COPPER_ION_BINDING	1
GO.0005654_NUCLEOPLASM	1
GO.0006754_ATP_BIOSYNTHETIC_PROCESS	1
GO.0006812_CATION_TRANSPORT	1
GO.0007229_INTEGRIN_MEDIATED_SIGNALING_PATHWAY	1
GO.0007243_INTRACELLULAR_PROTEIN_KINASE_CASCADE	1
GO.0007596_BLOOD_COAGULATION	1
GO.0008305_INTEGRIN_COMPLEX	1
GO.0016055_WNT_RECEPTOR_SIGNALING_PATHWAY	1
GO.0020037_HEME_BINDING	1
GO.0030917_MIDBRAIN_HINDBRAIN_BOUNDARY_DEVELOPMENT	1
GO.0031410_CYTOPLASMIC_VESICLE	1
GO.0032259_METHYLATION	1
GO.0042493_RESPONSE_TO_DRUG	1
GO.0050896_RESPONSE_TO_STIMULUS	1
GO.0051287_NAD_BINDING	1
GO.0060041_RETINA_DEVELOPMENT_IN_CAMERA_TYPE_EYE	1
GO.0005747_MITOCHONDRIAL_RESPIRATORY_CHAIN_COMPLEX_I	1
GO.0015986_ATP_SYNTHESIS_COUPLED_PROTON_TRANSPORT	1
GO.0031012_EXTRACELLULAR_MATRIX	1
GO.0004129_CYTOCHROME_C_OXIDASE_ACTIVITY	1
GO.0005198_STRUCTURAL_MOLECULE_ACTIVITY	1
GO.0005215_TRANSPORTER_ACTIVITY	1
GO.0005576_EXTRACELLULAR_REGION	1
GO.0005581_COLLAGEN	1
GO.0005615_EXTRACELLULAR_SPACE	1
GO.0006096_GLYCOLYSIS	1
GO.0006099_TRICARBOXYLIC_ACID_CYCLE	1
GO.0007155_CELL_ADHESION	1
GO.0007601_VISUAL_PERCEPTION	1
GO.0008083_GROWTH_FACTOR_ACTIVITY	1
GO.0015991_ATP_HYDROLYSIS_COUPLED_PROTON_TRANSPORT	1
GO.0045202_SYNAPSE	1
GO.0046933_HYDROGEN_ION_TRANSPORTING_ATP_SYNTHASE_ACTIVITY._ROTATIONAL_MECHANISM	1
GO.0001558_REGULATION_OF_CELL_GROWTH	1
GO.0004867_SERINE_TYPE_ENDOPEPTIDASE_INHIBITOR_ACTIVITY	1
GO.0005179_HORMONE_ACTIVITY	1
GO.0005216_ION_CHANNEL_ACTIVITY	1
GO.0005230_EXTRACELLULAR_LIGAND_GATED_ION_CHANNEL_ACTIVITY	1
GO.0005244_VOLTAGE_GATED_ION_CHANNEL_ACTIVITY	1
GO.0005520_INSULIN_LIKE_GROWTH_FACTOR_BINDING	1
GO.0005544_CALCIUM_DEPENDENT_PHOSPHOLIPID_BINDING	1
GO.0005882_INTERMEDIATE_FILAMENT	1
GO.0006811_ION_TRANSPORT	1
GO.0007156_HOMOPHILIC_CELL_ADHESION	1
GO.0008021_SYNAPTIC_VESICLE	1
GO.0015078_HYDROGEN_ION_TRANSMEMBRANE_TRANSPORTER_ACTIVITY	1
GO.0030054_CELL_JUNCTION	1
GO.0034765_REGULATION_OF_ION_TRANSMEMBRANE_TRANSPORT	1
GO.0045211_POSTSYNAPTIC_MEMBRANE	1
GO.0003707_STEROID_HORMONE_RECEPTOR_ACTIVITY	1
GO.0004497_MONOOXYGENASE_ACTIVITY	1
GO.0004879_LIGAND_DEPENDENT_NUCLEAR_RECEPTOR_ACTIVITY	1
GO.0004896_CYTOKINE_RECEPTOR_ACTIVITY	1
GO.0004930_G_PROTEIN_COUPLED_RECEPTOR_ACTIVITY	1
GO.0005249_VOLTAGE_GATED_POTASSIUM_CHANNEL_ACTIVITY	1
GO.0005887_INTEGRAL_TO_PLASMA_MEMBRANE	1
GO.0006813_POTASSIUM_ION_TRANSPORT	1
GO.0006814_SODIUM_ION_TRANSPORT	1
GO.0006821_CHLORIDE_TRANSPORT	1
GO.0006836_NEUROTRANSMITTER_TRANSPORT	1
GO.0007186_G_PROTEIN_COUPLED_RECEPTOR_PROTEIN_SIGNALING_PATHWAY	1
GO.0007218_NEUROPEPTIDE_SIGNALING_PATHWAY	1
GO.0008076_VOLTAGE_GATED_POTASSIUM_CHANNEL_COMPLEX	1
GO.0008289_LIPID_BINDING	1
GO.0008483_TRANSAMINASE_ACTIVITY	1
GO.0015293_SYMPORTER_ACTIVITY	1
GO.0016491_OXIDOREDUCTASE_ACTIVITY	1
GO.0016627_OXIDOREDUCTASE_ACTIVITY._ACTING_ON_THE_CH_CH_GROUP_OF_DONORS	1
GO.0022900_ELECTRON_TRANSPORT_CHAIN	1
GO.0043401_STEROID_HORMONE_MEDIATED_SIGNALING_PATHWAY	1
GO.0055114_OXIDATION_REDUCTION_PROCESS	1

## Sheet: bt.6
x
GO.0060041_RETINA_DEVELOPMENT_IN_CAMERA_TYPE_EYE	1.46269e-88
GO.0009880_EMBRYONIC_PATTERN_SPECIFICATION	3.14187e-79
GO.0031016_PANCREAS_DEVELOPMENT	1.65762e-72
GO.0045944_POSITIVE_REGULATION_OF_TRANSCRIPTION_FROM_RNA_POLYMERASE_II_PROMOTER	2.32961e-71
GO.0001756_SOMITOGENESIS	9.49589e-70
GO.0006260_DNA_REPLICATION	3.96499e-68
GO.0030901_MIDBRAIN_DEVELOPMENT	1.23115e-67
GO.0005654_NUCLEOPLASM	6.41414e-61
GO.0003899_DNA_DIRECTED_RNA_POLYMERASE_ACTIVITY	8.11327e-60
GO.0006413_TRANSLATIONAL_INITIATION	5.81293e-59
GO.0042254_RIBOSOME_BIOGENESIS	6.02423e-59
GO.0009952_ANTERIOR_POSTERIOR_PATTERN_FORMATION	3.09758e-57
GO.0006364_RRNA_PROCESSING	4.1623e-57
GO.0043049_OTIC_PLACODE_FORMATION	2.5779e-55
GO.0003743_TRANSLATION_INITIATION_FACTOR_ACTIVITY	5.2551e-54
GO.0009953_DORSAL_VENTRAL_PATTERN_FORMATION	1.33859e-51
GO.0030902_HINDBRAIN_DEVELOPMENT	7.87225e-51
GO.0005730_NUCLEOLUS	1.2618e-50
GO.0016055_WNT_RECEPTOR_SIGNALING_PATHWAY	4.65149e-50
GO.0031101_FIN_REGENERATION	9.49237e-47
GO.0000786_NUCLEOSOME	1.49033e-46
GO.0000785_CHROMATIN	4.22114e-45
GO.0004175_ENDOPEPTIDASE_ACTIVITY	4.95536e-45
GO.0006334_NUCLEOSOME_ASSEMBLY	2.95589e-44
GO.0004298_THREONINE_TYPE_ENDOPEPTIDASE_ACTIVITY	5.52133e-44
GO.0003714_TRANSCRIPTION_COREPRESSOR_ACTIVITY	5.79158e-44
GO.0030917_MIDBRAIN_HINDBRAIN_BOUNDARY_DEVELOPMENT	5.79158e-44
GO.0003723_RNA_BINDING	1.10167e-43
GO.0003713_TRANSCRIPTION_COACTIVATOR_ACTIVITY	1.81992e-43
GO.0005839_PROTEASOME_CORE_COMPLEX	1.86662e-43
GO.0000502_PROTEASOME_COMPLEX	2.01226e-43
GO.0001764_NEURON_MIGRATION	8.13985e-43
GO.0051603_PROTEOLYSIS_INVOLVED_IN_CELLULAR_PROTEIN_CATABOLIC_PROCESS	8.08903e-42
GO.0007498_MESODERM_DEVELOPMENT	4.91242e-41
GO.0003682_CHROMATIN_BINDING	1.22976e-40
GO.0005689_U12_TYPE_SPLICEOSOMAL_COMPLEX	8.78769e-40
GO.0042074_CELL_MIGRATION_INVOLVED_IN_GASTRULATION	1.72245e-38
GO.0030900_FOREBRAIN_DEVELOPMENT	1.16675e-37
GO.0001889_LIVER_DEVELOPMENT	1.28146e-35
GO.0030182_NEURON_DIFFERENTIATION	2.29494e-34
GO.0019904_PROTEIN_DOMAIN_SPECIFIC_BINDING	6.79527e-32
GO.0043966_HISTONE_H3_ACETYLATION	1.88031e-30
GO.0006396_RNA_PROCESSING	8.7636e-28
GO.0042493_RESPONSE_TO_DRUG	1.64189e-27
GO.0016607_NUCLEAR_SPECK	1.74269e-27
GO.0006397_MRNA_PROCESSING	6.20444e-25
GO.0030529_RIBONUCLEOPROTEIN_COMPLEX	9.5697e-24
GO.0003007_HEART_MORPHOGENESIS	7.45304e-23
GO.0031017_EXOCRINE_PANCREAS_DEVELOPMENT	7.45304e-23
GO.0007368_DETERMINATION_OF_LEFT_RIGHT_SYMMETRY	3.85735e-19
GO.0005385_ZINC_ION_TRANSMEMBRANE_TRANSPORTER_ACTIVITY	2.58597e-18
GO.0016702_OXIDOREDUCTASE_ACTIVITY._ACTING_ON_SINGLE_DONORS_WITH_INCORPORATION_OF_MOLECULAR_OXYGEN._INCORPORATION_OF_TWO_ATOMS_OF_OXYGEN	2.58597e-18
GO.0045892_NEGATIVE_REGULATION_OF_TRANSCRIPTION._DNA_DEPENDENT	2.58597e-18
GO.0016592_MEDIATOR_COMPLEX	5.3219e-17
GO.0008380_RNA_SPLICING	2.85161e-16
GO.0008026_ATP_DEPENDENT_HELICASE_ACTIVITY	1.4031e-15
GO.0005694_CHROMOSOME	6.55044e-15
GO.0030903_NOTOCHORD_DEVELOPMENT	3.63832e-14
GO.0004386_HELICASE_ACTIVITY	4.85208e-13
GO.0090090_NEGATIVE_REGULATION_OF_CANONICAL_WNT_RECEPTOR_SIGNALING_PATHWAY	2.67949e-12
GO.0060026_CONVERGENT_EXTENSION	2.74342e-11
GO.0060028_CONVERGENT_EXTENSION_INVOLVED_IN_AXIS_ELONGATION	2.74342e-11
GO.0031290_RETINAL_GANGLION_CELL_AXON_GUIDANCE	7.24834e-09
GO.0042221_RESPONSE_TO_CHEMICAL_STIMULUS	4.13843e-08
GO.0008284_POSITIVE_REGULATION_OF_CELL_PROLIFERATION	3.16632e-07
GO.0006412_TRANSLATION	3.30517e-06
GO.0048703_EMBRYONIC_VISCEROCRANIUM_MORPHOGENESIS	1.68438e-05
GO.0007219_NOTCH_SIGNALING_PATHWAY	6.11429e-05
GO.0007517_MUSCLE_ORGAN_DEVELOPMENT	0.000180604
GO.0040007_GROWTH	0.00028442
GO.0005667_TRANSCRIPTION_FACTOR_COMPLEX	0.00038141
GO.0008134_TRANSCRIPTION_FACTOR_BINDING	0.00038141
GO.0003684_DAMAGED_DNA_BINDING	0.00038141
GO.0016477_CELL_MIGRATION	0.0010167
GO.0005643_NUCLEAR_PORE	0.0138698
GO.0006511_UBIQUITIN_DEPENDENT_PROTEIN_CATABOLIC_PROCESS	0.0267899
GO.0005681_SPLICEOSOMAL_COMPLEX	0.0296384
GO.0004812_AMINOACYL_TRNA_LIGASE_ACTIVITY	0.0595099
GO.0009615_RESPONSE_TO_VIRUS	0.143917
GO.0006366_TRANSCRIPTION_FROM_RNA_POLYMERASE_II_PROMOTER	0.193185
GO.0006357_REGULATION_OF_TRANSCRIPTION_FROM_RNA_POLYMERASE_II_PROMOTER	0.441234
GO.0048793_PRONEPHROS_DEVELOPMENT	0.719528
GO.0006281_DNA_REPAIR	1
GO.0006974_RESPONSE_TO_DNA_DAMAGE_STIMULUS	1
GO.0042393_HISTONE_BINDING	1
GO.0051301_CELL_DIVISION	1
GO.0000775_CHROMOSOME._CENTROMERIC_REGION	1
GO.0000776_KINETOCHORE	1
GO.0006367_TRANSCRIPTION_INITIATION_FROM_RNA_POLYMERASE_II_PROMOTER	1
GO.0007049_CELL_CYCLE	1
GO.0007067_MITOSIS	1
GO.0008033_TRNA_PROCESSING	1
GO.0008094_DNA_DEPENDENT_ATPASE_ACTIVITY	1
GO.0010212_RESPONSE_TO_IONIZING_RADIATION	1
GO.0016568_CHROMATIN_MODIFICATION	1
GO.0051028_MRNA_TRANSPORT	1
GO.0070936_PROTEIN_K48_LINKED_UBIQUITINATION	1
GO.0000079_REGULATION_OF_CYCLIN_DEPENDENT_PROTEIN_KINASE_ACTIVITY	1
GO.0003143_EMBRYONIC_HEART_TUBE_MORPHOGENESIS	1
GO.0003777_MICROTUBULE_MOTOR_ACTIVITY	1
GO.0006310_DNA_RECOMBINATION	1
GO.0006417_REGULATION_OF_TRANSLATION	1
GO.0007059_CHROMOSOME_SEGREGATION	1
GO.0008287_PROTEIN_SERINE_THREONINE_PHOSPHATASE_COMPLEX	1
GO.0016817_HYDROLASE_ACTIVITY._ACTING_ON_ACID_ANHYDRIDES	1
GO.0000122_NEGATIVE_REGULATION_OF_TRANSCRIPTION_FROM_RNA_POLYMERASE_II_PROMOTER	1
GO.0000209_PROTEIN_POLYUBIQUITINATION	1
GO.0000910_CYTOKINESIS	1
GO.0000922_SPINDLE_POLE	1
GO.0001666_RESPONSE_TO_HYPOXIA	1
GO.0001755_NEURAL_CREST_CELL_MIGRATION	1
GO.0001947_HEART_LOOPING	1
GO.0003725_DOUBLE_STRANDED_RNA_BINDING	1
GO.0003779_ACTIN_BINDING	1
GO.0004177_AMINOPEPTIDASE_ACTIVITY	1
GO.0004180_CARBOXYPEPTIDASE_ACTIVITY	1
GO.0004252_SERINE_TYPE_ENDOPEPTIDASE_ACTIVITY	1
GO.0004527_EXONUCLEASE_ACTIVITY	1
GO.0004553_HYDROLASE_ACTIVITY._HYDROLYZING_O_GLYCOSYL_COMPOUNDS	1
GO.0004713_PROTEIN_TYROSINE_KINASE_ACTIVITY	1
GO.0004721_PHOSPHOPROTEIN_PHOSPHATASE_ACTIVITY	1
GO.0004871_SIGNAL_TRANSDUCER_ACTIVITY	1
GO.0004888_TRANSMEMBRANE_RECEPTOR_ACTIVITY	1
GO.0005102_RECEPTOR_BINDING	1
GO.0005267_POTASSIUM_CHANNEL_ACTIVITY	1
GO.0005624_MEMBRANE_FRACTION	1
GO.0005739_MITOCHONDRION	1
GO.0005743_MITOCHONDRIAL_INNER_MEMBRANE	1
GO.0005765_LYSOSOMAL_MEMBRANE	1
GO.0005777_PEROXISOME	1
GO.0005792_MICROSOME	1
GO.0005815_MICROTUBULE_ORGANIZING_CENTER	1
GO.0005819_SPINDLE	1
GO.0005874_MICROTUBULE	1
GO.0005876_SPINDLE_MICROTUBULE	1
GO.0005886_PLASMA_MEMBRANE	1
GO.0005921_GAP_JUNCTION	1
GO.0005922_CONNEXON_COMPLEX	1
GO.0006289_NUCLEOTIDE_EXCISION_REPAIR	1
GO.0006414_TRANSLATIONAL_ELONGATION	1
GO.0006457_PROTEIN_FOLDING	1
GO.0006468_PROTEIN_PHOSPHORYLATION	1
GO.0006629_LIPID_METABOLIC_PROCESS	1
GO.0006633_FATTY_ACID_BIOSYNTHETIC_PROCESS	1
GO.0006662_GLYCEROL_ETHER_METABOLIC_PROCESS	1
GO.0006730_ONE_CARBON_METABOLIC_PROCESS	1
GO.0006816_CALCIUM_ION_TRANSPORT	1
GO.0006950_RESPONSE_TO_STRESS	1
GO.0006955_IMMUNE_RESPONSE	1
GO.0006979_RESPONSE_TO_OXIDATIVE_STRESS	1
GO.0007017_MICROTUBULE_BASED_PROCESS	1
GO.0007018_MICROTUBULE_BASED_MOVEMENT	1
GO.0007154_CELL_COMMUNICATION	1
GO.0007160_CELL_MATRIX_ADHESION	1
GO.0007166_CELL_SURFACE_RECEPTOR_LINKED_SIGNALING_PATHWAY	1
GO.0007179_TRANSFORMING_GROWTH_FACTOR_BETA_RECEPTOR_SIGNALING_PATHWAY	1
GO.0007283_SPERMATOGENESIS	1
GO.0007399_NERVOUS_SYSTEM_DEVELOPMENT	1
GO.0007507_HEART_DEVELOPMENT	1
GO.0008017_MICROTUBULE_BINDING	1
GO.0008022_PROTEIN_C_TERMINUS_BINDING	1
GO.0008146_SULFOTRANSFERASE_ACTIVITY	1
GO.0008152_METABOLIC_PROCESS	1
GO.0008168_METHYLTRANSFERASE_ACTIVITY	1
GO.0008201_HEPARIN_BINDING	1
GO.0008236_SERINE_TYPE_PEPTIDASE_ACTIVITY	1
GO.0008237_METALLOPEPTIDASE_ACTIVITY	1
GO.0008373_SIALYLTRANSFERASE_ACTIVITY	1
GO.0008610_LIPID_BIOSYNTHETIC_PROCESS	1
GO.0009055_ELECTRON_CARRIER_ACTIVITY	1
GO.0009408_RESPONSE_TO_HEAT	1
GO.0009897_EXTERNAL_SIDE_OF_PLASMA_MEMBRANE	1
GO.0015662_ATPASE_ACTIVITY._COUPLED_TO_TRANSMEMBRANE_MOVEMENT_OF_IONS._PHOSPHORYLATIVE_MECHANISM	1
GO.0016311_DEPHOSPHORYLATION	1
GO.0016605_PML_BODY	1
GO.0016616_OXIDOREDUCTASE_ACTIVITY._ACTING_ON_THE_CH_OH_GROUP_OF_DONORS._NAD_OR_NADP_AS_ACCEPTOR	1
GO.0016772_TRANSFERASE_ACTIVITY._TRANSFERRING_PHOSPHORUS_CONTAINING_GROUPS	1
GO.0016779_NUCLEOTIDYLTRANSFERASE_ACTIVITY	1
GO.0016791_PHOSPHATASE_ACTIVITY	1
GO.0016810_HYDROLASE_ACTIVITY._ACTING_ON_CARBON_NITROGEN_.BUT_NOT_PEPTIDE._BONDS	1
GO.0016881_ACID_AMINO_ACID_LIGASE_ACTIVITY	1
GO.0018024_HISTONE_LYSINE_N_METHYLTRANSFERASE_ACTIVITY	1
GO.0019001_GUANYL_NUCLEOTIDE_BINDING	1
GO.0019899_ENZYME_BINDING	1
GO.0019901_PROTEIN_KINASE_BINDING	1
GO.0022857_TRANSMEMBRANE_TRANSPORTER_ACTIVITY	1
GO.0030097_HEMOPOIESIS	1
GO.0030163_PROTEIN_CATABOLIC_PROCESS	1
GO.0030170_PYRIDOXAL_PHOSPHATE_BINDING	1
GO.0030176_INTEGRAL_TO_ENDOPLASMIC_RETICULUM_MEMBRANE	1
GO.0030218_ERYTHROCYTE_DIFFERENTIATION	1
GO.0030308_NEGATIVE_REGULATION_OF_CELL_GROWTH	1
GO.0031965_NUCLEAR_MEMBRANE	1
GO.0032313_REGULATION_OF_RAB_GTPASE_ACTIVITY	1
GO.0035091_PHOSPHATIDYLINOSITOL_BINDING	1
GO.0035162_EMBRYONIC_HEMOPOIESIS	1
GO.0042826_HISTONE_DEACETYLASE_BINDING	1
GO.0043010_CAMERA_TYPE_EYE_DEVELOPMENT	1
GO.0043169_CATION_BINDING	1
GO.0043234_PROTEIN_COMPLEX	1
GO.0045087_INNATE_IMMUNE_RESPONSE	1
GO.0048514_BLOOD_VESSEL_MORPHOGENESIS	1
GO.0050660_FLAVIN_ADENINE_DINUCLEOTIDE_BINDING	1
GO.0050821_PROTEIN_STABILIZATION	1
GO.0051082_UNFOLDED_PROTEIN_BINDING	1
GO.0051216_CARTILAGE_DEVELOPMENT	1
GO.0051537_2_IRON._2_SULFUR_CLUSTER_BINDING	1
GO.0051539_4_IRON._4_SULFUR_CLUSTER_BINDING	1
GO.0051592_RESPONSE_TO_CALCIUM_ION	1
GO.0051726_REGULATION_OF_CELL_CYCLE	1
GO.0055085_TRANSMEMBRANE_TRANSPORT	1
GO.0070588_CALCIUM_ION_TRANSMEMBRANE_TRANSPORT	1
GO.0071805_POTASSIUM_ION_TRANSMEMBRANE_TRANSPORT	1
GO.0001525_ANGIOGENESIS	1
GO.0001568_BLOOD_VESSEL_DEVELOPMENT	1
GO.0001570_VASCULOGENESIS	1
GO.0002040_SPROUTING_ANGIOGENESIS	1
GO.0003729_MRNA_BINDING	1
GO.0004221_UBIQUITIN_THIOLESTERASE_ACTIVITY	1
GO.0004672_PROTEIN_KINASE_ACTIVITY	1
GO.0004674_PROTEIN_SERINE_THREONINE_KINASE_ACTIVITY	1
GO.0004722_PROTEIN_SERINE_THREONINE_PHOSPHATASE_ACTIVITY	1
GO.0004842_UBIQUITIN_PROTEIN_LIGASE_ACTIVITY	1
GO.0005044_SCAVENGER_RECEPTOR_ACTIVITY	1
GO.0005506_IRON_ION_BINDING	1
GO.0005507_COPPER_ION_BINDING	1
GO.0006418_TRNA_AMINOACYLATION_FOR_PROTEIN_TRANSLATION	1
GO.0006754_ATP_BIOSYNTHETIC_PROCESS	1
GO.0006812_CATION_TRANSPORT	1
GO.0007169_TRANSMEMBRANE_RECEPTOR_PROTEIN_TYROSINE_KINASE_SIGNALING_PATHWAY	1
GO.0007229_INTEGRIN_MEDIATED_SIGNALING_PATHWAY	1
GO.0007243_INTRACELLULAR_PROTEIN_KINASE_CASCADE	1
GO.0007420_BRAIN_DEVELOPMENT	1
GO.0007596_BLOOD_COAGULATION	1
GO.0008045_MOTOR_AXON_GUIDANCE	1
GO.0008305_INTEGRIN_COMPLEX	1
GO.0016705_OXIDOREDUCTASE_ACTIVITY._ACTING_ON_PAIRED_DONORS._WITH_INCORPORATION_OR_REDUCTION_OF_MOLECULAR_OXYGEN	1
GO.0019825_OXYGEN_BINDING	1
GO.0020037_HEME_BINDING	1
GO.0031410_CYTOPLASMIC_VESICLE	1
GO.0032259_METHYLATION	1
GO.0050896_RESPONSE_TO_STIMULUS	1
GO.0051287_NAD_BINDING	1
GO.0060047_HEART_CONTRACTION	1
GO.0003735_STRUCTURAL_CONSTITUENT_OF_RIBOSOME	1
GO.0005509_CALCIUM_ION_BINDING	1
GO.0005578_PROTEINACEOUS_EXTRACELLULAR_MATRIX	1
GO.0005747_MITOCHONDRIAL_RESPIRATORY_CHAIN_COMPLEX_I	1
GO.0005840_RIBOSOME	1
GO.0007275_MULTICELLULAR_ORGANISMAL_DEVELOPMENT	1
GO.0015986_ATP_SYNTHESIS_COUPLED_PROTON_TRANSPORT	1
GO.0015992_PROTON_TRANSPORT	1
GO.0022627_CYTOSOLIC_SMALL_RIBOSOMAL_SUBUNIT	1
GO.0031012_EXTRACELLULAR_MATRIX	1
GO.0043565_SEQUENCE_SPECIFIC_DNA_BINDING	1
GO.0004129_CYTOCHROME_C_OXIDASE_ACTIVITY	1
GO.0005198_STRUCTURAL_MOLECULE_ACTIVITY	1
GO.0005215_TRANSPORTER_ACTIVITY	1
GO.0005576_EXTRACELLULAR_REGION	1
GO.0005581_COLLAGEN	1
GO.0005615_EXTRACELLULAR_SPACE	1
GO.0006096_GLYCOLYSIS	1
GO.0006099_TRICARBOXYLIC_ACID_CYCLE	1
GO.0007155_CELL_ADHESION	1
GO.0007223_WNT_RECEPTOR_SIGNALING_PATHWAY._CALCIUM_MODULATING_PATHWAY	1
GO.0007411_AXON_GUIDANCE	1
GO.0007601_VISUAL_PERCEPTION	1
GO.0008083_GROWTH_FACTOR_ACTIVITY	1
GO.0015991_ATP_HYDROLYSIS_COUPLED_PROTON_TRANSPORT	1
GO.0045202_SYNAPSE	1
GO.0046933_HYDROGEN_ION_TRANSPORTING_ATP_SYNTHASE_ACTIVITY._ROTATIONAL_MECHANISM	1
GO.0001558_REGULATION_OF_CELL_GROWTH	1
GO.0004714_TRANSMEMBRANE_RECEPTOR_PROTEIN_TYROSINE_KINASE_ACTIVITY	1
GO.0004867_SERINE_TYPE_ENDOPEPTIDASE_INHIBITOR_ACTIVITY	1
GO.0005179_HORMONE_ACTIVITY	1
GO.0005216_ION_CHANNEL_ACTIVITY	1
GO.0005230_EXTRACELLULAR_LIGAND_GATED_ION_CHANNEL_ACTIVITY	1
GO.0005244_VOLTAGE_GATED_ION_CHANNEL_ACTIVITY	1
GO.0005520_INSULIN_LIKE_GROWTH_FACTOR_BINDING	1
GO.0005544_CALCIUM_DEPENDENT_PHOSPHOLIPID_BINDING	1
GO.0005882_INTERMEDIATE_FILAMENT	1
GO.0006811_ION_TRANSPORT	1
GO.0007156_HOMOPHILIC_CELL_ADHESION	1
GO.0008021_SYNAPTIC_VESICLE	1
GO.0009790_EMBRYO_DEVELOPMENT	1
GO.0009986_CELL_SURFACE	1
GO.0015078_HYDROGEN_ION_TRANSMEMBRANE_TRANSPORTER_ACTIVITY	1
GO.0030054_CELL_JUNCTION	1
GO.0034765_REGULATION_OF_ION_TRANSMEMBRANE_TRANSPORT	1
GO.0045211_POSTSYNAPTIC_MEMBRANE	1
GO.0051258_PROTEIN_POLYMERIZATION	1
GO.0003707_STEROID_HORMONE_RECEPTOR_ACTIVITY	1
GO.0004497_MONOOXYGENASE_ACTIVITY	1
GO.0004879_LIGAND_DEPENDENT_NUCLEAR_RECEPTOR_ACTIVITY	1
GO.0004896_CYTOKINE_RECEPTOR_ACTIVITY	1
GO.0004930_G_PROTEIN_COUPLED_RECEPTOR_ACTIVITY	1
GO.0005249_VOLTAGE_GATED_POTASSIUM_CHANNEL_ACTIVITY	1
GO.0005887_INTEGRAL_TO_PLASMA_MEMBRANE	1
GO.0006813_POTASSIUM_ION_TRANSPORT	1
GO.0006814_SODIUM_ION_TRANSPORT	1
GO.0006821_CHLORIDE_TRANSPORT	1
GO.0006836_NEUROTRANSMITTER_TRANSPORT	1
GO.0007186_G_PROTEIN_COUPLED_RECEPTOR_PROTEIN_SIGNALING_PATHWAY	1
GO.0007218_NEUROPEPTIDE_SIGNALING_PATHWAY	1
GO.0008076_VOLTAGE_GATED_POTASSIUM_CHANNEL_COMPLEX	1
GO.0008289_LIPID_BINDING	1
GO.0008483_TRANSAMINASE_ACTIVITY	1
GO.0015293_SYMPORTER_ACTIVITY	1
GO.0016491_OXIDOREDUCTASE_ACTIVITY	1
GO.0016627_OXIDOREDUCTASE_ACTIVITY._ACTING_ON_THE_CH_CH_GROUP_OF_DONORS	1
GO.0022900_ELECTRON_TRANSPORT_CHAIN	1
GO.0043401_STEROID_HORMONE_MEDIATED_SIGNALING_PATHWAY	1
GO.0055114_OXIDATION_REDUCTION_PROCESS	1

## Sheet: bt.7
x
GO.0003143_EMBRYONIC_HEART_TUBE_MORPHOGENESIS	1.89643e-66
GO.0003723_RNA_BINDING	6.34394e-57
GO.0000910_CYTOKINESIS	3.12886e-54
GO.0007498_MESODERM_DEVELOPMENT	1.26912e-48
GO.0042074_CELL_MIGRATION_INVOLVED_IN_GASTRULATION	1.11448e-43
GO.0006366_TRANSCRIPTION_FROM_RNA_POLYMERASE_II_PROMOTER	2.56625e-42
GO.0016607_NUCLEAR_SPECK	1.16078e-40
GO.0006334_NUCLEOSOME_ASSEMBLY	1.16145e-40
GO.0006396_RNA_PROCESSING	1.05773e-38
GO.0006397_MRNA_PROCESSING	2.07561e-38
GO.0005694_CHROMOSOME	3.21281e-37
GO.0000786_NUCLEOSOME	1.72199e-36
GO.0005730_NUCLEOLUS	2.09779e-35
GO.0008380_RNA_SPLICING	3.20051e-32
GO.0008026_ATP_DEPENDENT_HELICASE_ACTIVITY	3.39707e-29
GO.0005689_U12_TYPE_SPLICEOSOMAL_COMPLEX	3.20613e-28
GO.0009953_DORSAL_VENTRAL_PATTERN_FORMATION	5.01238e-25
GO.0003899_DNA_DIRECTED_RNA_POLYMERASE_ACTIVITY	2.94356e-18
GO.0005681_SPLICEOSOMAL_COMPLEX	5.08017e-16
GO.0004386_HELICASE_ACTIVITY	1.74565e-12
GO.0005643_NUCLEAR_PORE	6.97385e-10
GO.0016592_MEDIATOR_COMPLEX	1.24809e-09
GO.0051028_MRNA_TRANSPORT	4.30897e-09
GO.0042493_RESPONSE_TO_DRUG	3.76235e-08
GO.0007368_DETERMINATION_OF_LEFT_RIGHT_SYMMETRY	2.79014e-06
GO.0042254_RIBOSOME_BIOGENESIS	9.14367e-06
GO.0040007_GROWTH	2.9218e-05
GO.0009952_ANTERIOR_POSTERIOR_PATTERN_FORMATION	0.00678652
GO.0051301_CELL_DIVISION	0.00686672
GO.0016477_CELL_MIGRATION	0.14239
GO.0007507_HEART_DEVELOPMENT	0.666254
GO.0006281_DNA_REPAIR	1
GO.0006974_RESPONSE_TO_DNA_DAMAGE_STIMULUS	1
GO.0042393_HISTONE_BINDING	1
GO.0000775_CHROMOSOME._CENTROMERIC_REGION	1
GO.0000776_KINETOCHORE	1
GO.0006260_DNA_REPLICATION	1
GO.0006357_REGULATION_OF_TRANSCRIPTION_FROM_RNA_POLYMERASE_II_PROMOTER	1
GO.0006367_TRANSCRIPTION_INITIATION_FROM_RNA_POLYMERASE_II_PROMOTER	1
GO.0007049_CELL_CYCLE	1
GO.0007067_MITOSIS	1
GO.0008033_TRNA_PROCESSING	1
GO.0008094_DNA_DEPENDENT_ATPASE_ACTIVITY	1
GO.0010212_RESPONSE_TO_IONIZING_RADIATION	1
GO.0016568_CHROMATIN_MODIFICATION	1
GO.0070936_PROTEIN_K48_LINKED_UBIQUITINATION	1
GO.0000079_REGULATION_OF_CYCLIN_DEPENDENT_PROTEIN_KINASE_ACTIVITY	1
GO.0001756_SOMITOGENESIS	1
GO.0003682_CHROMATIN_BINDING	1
GO.0003777_MICROTUBULE_MOTOR_ACTIVITY	1
GO.0006310_DNA_RECOMBINATION	1
GO.0006417_REGULATION_OF_TRANSLATION	1
GO.0007059_CHROMOSOME_SEGREGATION	1
GO.0008287_PROTEIN_SERINE_THREONINE_PHOSPHATASE_COMPLEX	1
GO.0009880_EMBRYONIC_PATTERN_SPECIFICATION	1
GO.0016817_HYDROLASE_ACTIVITY._ACTING_ON_ACID_ANHYDRIDES	1
GO.0030901_MIDBRAIN_DEVELOPMENT	1
GO.0043049_OTIC_PLACODE_FORMATION	1
GO.0000122_NEGATIVE_REGULATION_OF_TRANSCRIPTION_FROM_RNA_POLYMERASE_II_PROMOTER	1
GO.0000209_PROTEIN_POLYUBIQUITINATION	1
GO.0000785_CHROMATIN	1
GO.0000922_SPINDLE_POLE	1
GO.0001666_RESPONSE_TO_HYPOXIA	1
GO.0001755_NEURAL_CREST_CELL_MIGRATION	1
GO.0001947_HEART_LOOPING	1
GO.0003007_HEART_MORPHOGENESIS	1
GO.0003714_TRANSCRIPTION_COREPRESSOR_ACTIVITY	1
GO.0003725_DOUBLE_STRANDED_RNA_BINDING	1
GO.0003779_ACTIN_BINDING	1
GO.0004177_AMINOPEPTIDASE_ACTIVITY	1
GO.0004180_CARBOXYPEPTIDASE_ACTIVITY	1
GO.0004252_SERINE_TYPE_ENDOPEPTIDASE_ACTIVITY	1
GO.0004527_EXONUCLEASE_ACTIVITY	1
GO.0004553_HYDROLASE_ACTIVITY._HYDROLYZING_O_GLYCOSYL_COMPOUNDS	1
GO.0004713_PROTEIN_TYROSINE_KINASE_ACTIVITY	1
GO.0004721_PHOSPHOPROTEIN_PHOSPHATASE_ACTIVITY	1
GO.0004871_SIGNAL_TRANSDUCER_ACTIVITY	1
GO.0004888_TRANSMEMBRANE_RECEPTOR_ACTIVITY	1
GO.0005102_RECEPTOR_BINDING	1
GO.0005267_POTASSIUM_CHANNEL_ACTIVITY	1
GO.0005385_ZINC_ION_TRANSMEMBRANE_TRANSPORTER_ACTIVITY	1
GO.0005624_MEMBRANE_FRACTION	1
GO.0005667_TRANSCRIPTION_FACTOR_COMPLEX	1
GO.0005739_MITOCHONDRION	1
GO.0005743_MITOCHONDRIAL_INNER_MEMBRANE	1
GO.0005765_LYSOSOMAL_MEMBRANE	1
GO.0005777_PEROXISOME	1
GO.0005792_MICROSOME	1
GO.0005815_MICROTUBULE_ORGANIZING_CENTER	1
GO.0005819_SPINDLE	1
GO.0005874_MICROTUBULE	1
GO.0005876_SPINDLE_MICROTUBULE	1
GO.0005886_PLASMA_MEMBRANE	1
GO.0005921_GAP_JUNCTION	1
GO.0005922_CONNEXON_COMPLEX	1
GO.0006289_NUCLEOTIDE_EXCISION_REPAIR	1
GO.0006414_TRANSLATIONAL_ELONGATION	1
GO.0006457_PROTEIN_FOLDING	1
GO.0006468_PROTEIN_PHOSPHORYLATION	1
GO.0006511_UBIQUITIN_DEPENDENT_PROTEIN_CATABOLIC_PROCESS	1
GO.0006629_LIPID_METABOLIC_PROCESS	1
GO.0006633_FATTY_ACID_BIOSYNTHETIC_PROCESS	1
GO.0006662_GLYCEROL_ETHER_METABOLIC_PROCESS	1
GO.0006730_ONE_CARBON_METABOLIC_PROCESS	1
GO.0006816_CALCIUM_ION_TRANSPORT	1
GO.0006950_RESPONSE_TO_STRESS	1
GO.0006955_IMMUNE_RESPONSE	1
GO.0006979_RESPONSE_TO_OXIDATIVE_STRESS	1
GO.0007017_MICROTUBULE_BASED_PROCESS	1
GO.0007018_MICROTUBULE_BASED_MOVEMENT	1
GO.0007154_CELL_COMMUNICATION	1
GO.0007160_CELL_MATRIX_ADHESION	1
GO.0007166_CELL_SURFACE_RECEPTOR_LINKED_SIGNALING_PATHWAY	1
GO.0007179_TRANSFORMING_GROWTH_FACTOR_BETA_RECEPTOR_SIGNALING_PATHWAY	1
GO.0007283_SPERMATOGENESIS	1
GO.0007399_NERVOUS_SYSTEM_DEVELOPMENT	1
GO.0008017_MICROTUBULE_BINDING	1
GO.0008022_PROTEIN_C_TERMINUS_BINDING	1
GO.0008134_TRANSCRIPTION_FACTOR_BINDING	1
GO.0008146_SULFOTRANSFERASE_ACTIVITY	1
GO.0008152_METABOLIC_PROCESS	1
GO.0008168_METHYLTRANSFERASE_ACTIVITY	1
GO.0008201_HEPARIN_BINDING	1
GO.0008236_SERINE_TYPE_PEPTIDASE_ACTIVITY	1
GO.0008237_METALLOPEPTIDASE_ACTIVITY	1
GO.0008373_SIALYLTRANSFERASE_ACTIVITY	1
GO.0008610_LIPID_BIOSYNTHETIC_PROCESS	1
GO.0009055_ELECTRON_CARRIER_ACTIVITY	1
GO.0009408_RESPONSE_TO_HEAT	1
GO.0009615_RESPONSE_TO_VIRUS	1
GO.0009897_EXTERNAL_SIDE_OF_PLASMA_MEMBRANE	1
GO.0015662_ATPASE_ACTIVITY._COUPLED_TO_TRANSMEMBRANE_MOVEMENT_OF_IONS._PHOSPHORYLATIVE_MECHANISM	1
GO.0016311_DEPHOSPHORYLATION	1
GO.0016605_PML_BODY	1
GO.0016616_OXIDOREDUCTASE_ACTIVITY._ACTING_ON_THE_CH_OH_GROUP_OF_DONORS._NAD_OR_NADP_AS_ACCEPTOR	1
GO.0016702_OXIDOREDUCTASE_ACTIVITY._ACTING_ON_SINGLE_DONORS_WITH_INCORPORATION_OF_MOLECULAR_OXYGEN._INCORPORATION_OF_TWO_ATOMS_OF_OXYGEN	1
GO.0016772_TRANSFERASE_ACTIVITY._TRANSFERRING_PHOSPHORUS_CONTAINING_GROUPS	1
GO.0016779_NUCLEOTIDYLTRANSFERASE_ACTIVITY	1
GO.0016791_PHOSPHATASE_ACTIVITY	1
GO.0016810_HYDROLASE_ACTIVITY._ACTING_ON_CARBON_NITROGEN_.BUT_NOT_PEPTIDE._BONDS	1
GO.0016881_ACID_AMINO_ACID_LIGASE_ACTIVITY	1
GO.0018024_HISTONE_LYSINE_N_METHYLTRANSFERASE_ACTIVITY	1
GO.0019001_GUANYL_NUCLEOTIDE_BINDING	1
GO.0019899_ENZYME_BINDING	1
GO.0019901_PROTEIN_KINASE_BINDING	1
GO.0022857_TRANSMEMBRANE_TRANSPORTER_ACTIVITY	1
GO.0030097_HEMOPOIESIS	1
GO.0030163_PROTEIN_CATABOLIC_PROCESS	1
GO.0030170_PYRIDOXAL_PHOSPHATE_BINDING	1
GO.0030176_INTEGRAL_TO_ENDOPLASMIC_RETICULUM_MEMBRANE	1
GO.0030218_ERYTHROCYTE_DIFFERENTIATION	1
GO.0030308_NEGATIVE_REGULATION_OF_CELL_GROWTH	1
GO.0031016_PANCREAS_DEVELOPMENT	1
GO.0031017_EXOCRINE_PANCREAS_DEVELOPMENT	1
GO.0031101_FIN_REGENERATION	1
GO.0031965_NUCLEAR_MEMBRANE	1
GO.0032313_REGULATION_OF_RAB_GTPASE_ACTIVITY	1
GO.0035091_PHOSPHATIDYLINOSITOL_BINDING	1
GO.0035162_EMBRYONIC_HEMOPOIESIS	1
GO.0042826_HISTONE_DEACETYLASE_BINDING	1
GO.0043010_CAMERA_TYPE_EYE_DEVELOPMENT	1
GO.0043169_CATION_BINDING	1
GO.0043234_PROTEIN_COMPLEX	1
GO.0043966_HISTONE_H3_ACETYLATION	1
GO.0045087_INNATE_IMMUNE_RESPONSE	1
GO.0045892_NEGATIVE_REGULATION_OF_TRANSCRIPTION._DNA_DEPENDENT	1
GO.0048514_BLOOD_VESSEL_MORPHOGENESIS	1
GO.0048703_EMBRYONIC_VISCEROCRANIUM_MORPHOGENESIS	1
GO.0048793_PRONEPHROS_DEVELOPMENT	1
GO.0050660_FLAVIN_ADENINE_DINUCLEOTIDE_BINDING	1
GO.0050821_PROTEIN_STABILIZATION	1
GO.0051082_UNFOLDED_PROTEIN_BINDING	1
GO.0051216_CARTILAGE_DEVELOPMENT	1
GO.0051537_2_IRON._2_SULFUR_CLUSTER_BINDING	1
GO.0051539_4_IRON._4_SULFUR_CLUSTER_BINDING	1
GO.0051592_RESPONSE_TO_CALCIUM_ION	1
GO.0051726_REGULATION_OF_CELL_CYCLE	1
GO.0055085_TRANSMEMBRANE_TRANSPORT	1
GO.0060026_CONVERGENT_EXTENSION	1
GO.0060028_CONVERGENT_EXTENSION_INVOLVED_IN_AXIS_ELONGATION	1
GO.0070588_CALCIUM_ION_TRANSMEMBRANE_TRANSPORT	1
GO.0071805_POTASSIUM_ION_TRANSMEMBRANE_TRANSPORT	1
GO.0090090_NEGATIVE_REGULATION_OF_CANONICAL_WNT_RECEPTOR_SIGNALING_PATHWAY	1
GO.0001525_ANGIOGENESIS	1
GO.0001568_BLOOD_VESSEL_DEVELOPMENT	1
GO.0001570_VASCULOGENESIS	1
GO.0001764_NEURON_MIGRATION	1
GO.0001889_LIVER_DEVELOPMENT	1
GO.0002040_SPROUTING_ANGIOGENESIS	1
GO.0003684_DAMAGED_DNA_BINDING	1
GO.0003713_TRANSCRIPTION_COACTIVATOR_ACTIVITY	1
GO.0003729_MRNA_BINDING	1
GO.0004221_UBIQUITIN_THIOLESTERASE_ACTIVITY	1
GO.0004672_PROTEIN_KINASE_ACTIVITY	1
GO.0004674_PROTEIN_SERINE_THREONINE_KINASE_ACTIVITY	1
GO.0004722_PROTEIN_SERINE_THREONINE_PHOSPHATASE_ACTIVITY	1
GO.0004842_UBIQUITIN_PROTEIN_LIGASE_ACTIVITY	1
GO.0005044_SCAVENGER_RECEPTOR_ACTIVITY	1
GO.0005506_IRON_ION_BINDING	1
GO.0005507_COPPER_ION_BINDING	1
GO.0005654_NUCLEOPLASM	1
GO.0006418_TRNA_AMINOACYLATION_FOR_PROTEIN_TRANSLATION	1
GO.0006754_ATP_BIOSYNTHETIC_PROCESS	1
GO.0006812_CATION_TRANSPORT	1
GO.0007169_TRANSMEMBRANE_RECEPTOR_PROTEIN_TYROSINE_KINASE_SIGNALING_PATHWAY	1
GO.0007219_NOTCH_SIGNALING_PATHWAY	1
GO.0007229_INTEGRIN_MEDIATED_SIGNALING_PATHWAY	1
GO.0007243_INTRACELLULAR_PROTEIN_KINASE_CASCADE	1
GO.0007420_BRAIN_DEVELOPMENT	1
GO.0007596_BLOOD_COAGULATION	1
GO.0008045_MOTOR_AXON_GUIDANCE	1
GO.0008284_POSITIVE_REGULATION_OF_CELL_PROLIFERATION	1
GO.0008305_INTEGRIN_COMPLEX	1
GO.0016055_WNT_RECEPTOR_SIGNALING_PATHWAY	1
GO.0016705_OXIDOREDUCTASE_ACTIVITY._ACTING_ON_PAIRED_DONORS._WITH_INCORPORATION_OR_REDUCTION_OF_MOLECULAR_OXYGEN	1
GO.0019825_OXYGEN_BINDING	1
GO.0019904_PROTEIN_DOMAIN_SPECIFIC_BINDING	1
GO.0020037_HEME_BINDING	1
GO.0030182_NEURON_DIFFERENTIATION	1
GO.0030917_MIDBRAIN_HINDBRAIN_BOUNDARY_DEVELOPMENT	1
GO.0031290_RETINAL_GANGLION_CELL_AXON_GUIDANCE	1
GO.0031410_CYTOPLASMIC_VESICLE	1
GO.0032259_METHYLATION	1
GO.0045944_POSITIVE_REGULATION_OF_TRANSCRIPTION_FROM_RNA_POLYMERASE_II_PROMOTER	1
GO.0050896_RESPONSE_TO_STIMULUS	1
GO.0051287_NAD_BINDING	1
GO.0060041_RETINA_DEVELOPMENT_IN_CAMERA_TYPE_EYE	1
GO.0060047_HEART_CONTRACTION	1
GO.0000502_PROTEASOME_COMPLEX	1
GO.0003743_TRANSLATION_INITIATION_FACTOR_ACTIVITY	1
GO.0004175_ENDOPEPTIDASE_ACTIVITY	1
GO.0004298_THREONINE_TYPE_ENDOPEPTIDASE_ACTIVITY	1
GO.0004812_AMINOACYL_TRNA_LIGASE_ACTIVITY	1
GO.0005839_PROTEASOME_CORE_COMPLEX	1
GO.0006364_RRNA_PROCESSING	1
GO.0006413_TRANSLATIONAL_INITIATION	1
GO.0007517_MUSCLE_ORGAN_DEVELOPMENT	1
GO.0030900_FOREBRAIN_DEVELOPMENT	1
GO.0030902_HINDBRAIN_DEVELOPMENT	1
GO.0030903_NOTOCHORD_DEVELOPMENT	1
GO.0042221_RESPONSE_TO_CHEMICAL_STIMULUS	1
GO.0051603_PROTEOLYSIS_INVOLVED_IN_CELLULAR_PROTEIN_CATABOLIC_PROCESS	1
GO.0003735_STRUCTURAL_CONSTITUENT_OF_RIBOSOME	1
GO.0005509_CALCIUM_ION_BINDING	1
GO.0005578_PROTEINACEOUS_EXTRACELLULAR_MATRIX	1
GO.0005747_MITOCHONDRIAL_RESPIRATORY_CHAIN_COMPLEX_I	1
GO.0005840_RIBOSOME	1
GO.0006412_TRANSLATION	1
GO.0007275_MULTICELLULAR_ORGANISMAL_DEVELOPMENT	1
GO.0015986_ATP_SYNTHESIS_COUPLED_PROTON_TRANSPORT	1
GO.0015992_PROTON_TRANSPORT	1
GO.0022627_CYTOSOLIC_SMALL_RIBOSOMAL_SUBUNIT	1
GO.0030529_RIBONUCLEOPROTEIN_COMPLEX	1
GO.0031012_EXTRACELLULAR_MATRIX	1
GO.0043565_SEQUENCE_SPECIFIC_DNA_BINDING	1
GO.0004129_CYTOCHROME_C_OXIDASE_ACTIVITY	1
GO.0005198_STRUCTURAL_MOLECULE_ACTIVITY	1
GO.0005215_TRANSPORTER_ACTIVITY	1
GO.0005576_EXTRACELLULAR_REGION	1
GO.0005581_COLLAGEN	1
GO.0005615_EXTRACELLULAR_SPACE	1
GO.0006096_GLYCOLYSIS	1
GO.0006099_TRICARBOXYLIC_ACID_CYCLE	1
GO.0007155_CELL_ADHESION	1
GO.0007223_WNT_RECEPTOR_SIGNALING_PATHWAY._CALCIUM_MODULATING_PATHWAY	1
GO.0007411_AXON_GUIDANCE	1
GO.0007601_VISUAL_PERCEPTION	1
GO.0008083_GROWTH_FACTOR_ACTIVITY	1
GO.0015991_ATP_HYDROLYSIS_COUPLED_PROTON_TRANSPORT	1
GO.0045202_SYNAPSE	1
GO.0046933_HYDROGEN_ION_TRANSPORTING_ATP_SYNTHASE_ACTIVITY._ROTATIONAL_MECHANISM	1
GO.0001558_REGULATION_OF_CELL_GROWTH	1
GO.0004714_TRANSMEMBRANE_RECEPTOR_PROTEIN_TYROSINE_KINASE_ACTIVITY	1
GO.0004867_SERINE_TYPE_ENDOPEPTIDASE_INHIBITOR_ACTIVITY	1
GO.0005179_HORMONE_ACTIVITY	1
GO.0005216_ION_CHANNEL_ACTIVITY	1
GO.0005230_EXTRACELLULAR_LIGAND_GATED_ION_CHANNEL_ACTIVITY	1
GO.0005244_VOLTAGE_GATED_ION_CHANNEL_ACTIVITY	1
GO.0005520_INSULIN_LIKE_GROWTH_FACTOR_BINDING	1
GO.0005544_CALCIUM_DEPENDENT_PHOSPHOLIPID_BINDING	1
GO.0005882_INTERMEDIATE_FILAMENT	1
GO.0006811_ION_TRANSPORT	1
GO.0007156_HOMOPHILIC_CELL_ADHESION	1
GO.0008021_SYNAPTIC_VESICLE	1
GO.0009790_EMBRYO_DEVELOPMENT	1
GO.0009986_CELL_SURFACE	1
GO.0015078_HYDROGEN_ION_TRANSMEMBRANE_TRANSPORTER_ACTIVITY	1
GO.0030054_CELL_JUNCTION	1
GO.0034765_REGULATION_OF_ION_TRANSMEMBRANE_TRANSPORT	1
GO.0045211_POSTSYNAPTIC_MEMBRANE	1
GO.0051258_PROTEIN_POLYMERIZATION	1
GO.0003707_STEROID_HORMONE_RECEPTOR_ACTIVITY	1
GO.0004497_MONOOXYGENASE_ACTIVITY	1
GO.0004879_LIGAND_DEPENDENT_NUCLEAR_RECEPTOR_ACTIVITY	1
GO.0004896_CYTOKINE_RECEPTOR_ACTIVITY	1
GO.0004930_G_PROTEIN_COUPLED_RECEPTOR_ACTIVITY	1
GO.0005249_VOLTAGE_GATED_POTASSIUM_CHANNEL_ACTIVITY	1
GO.0005887_INTEGRAL_TO_PLASMA_MEMBRANE	1
GO.0006813_POTASSIUM_ION_TRANSPORT	1
GO.0006814_SODIUM_ION_TRANSPORT	1
GO.0006821_CHLORIDE_TRANSPORT	1
GO.0006836_NEUROTRANSMITTER_TRANSPORT	1
GO.0007186_G_PROTEIN_COUPLED_RECEPTOR_PROTEIN_SIGNALING_PATHWAY	1
GO.0007218_NEUROPEPTIDE_SIGNALING_PATHWAY	1
GO.0008076_VOLTAGE_GATED_POTASSIUM_CHANNEL_COMPLEX	1
GO.0008289_LIPID_BINDING	1
GO.0008483_TRANSAMINASE_ACTIVITY	1
GO.0015293_SYMPORTER_ACTIVITY	1
GO.0016491_OXIDOREDUCTASE_ACTIVITY	1
GO.0016627_OXIDOREDUCTASE_ACTIVITY._ACTING_ON_THE_CH_CH_GROUP_OF_DONORS	1
GO.0022900_ELECTRON_TRANSPORT_CHAIN	1
GO.0043401_STEROID_HORMONE_MEDIATED_SIGNALING_PATHWAY	1
GO.0055114_OXIDATION_REDUCTION_PROCESS	1

## Sheet: bt.8
x
GO.0007049_CELL_CYCLE	3.89932e-78
GO.0007067_MITOSIS	5.7209e-67
GO.0006281_DNA_REPAIR	1.5024e-55
GO.0006367_TRANSCRIPTION_INITIATION_FROM_RNA_POLYMERASE_II_PROMOTER	1.1095e-51
GO.0006357_REGULATION_OF_TRANSCRIPTION_FROM_RNA_POLYMERASE_II_PROMOTER	5.07048e-49
GO.0051301_CELL_DIVISION	1.11581e-45
GO.0008026_ATP_DEPENDENT_HELICASE_ACTIVITY	1.54615e-44
GO.0005694_CHROMOSOME	3.58995e-41
GO.0005643_NUCLEAR_PORE	1.39151e-40
GO.0006397_MRNA_PROCESSING	1.33352e-39
GO.0004386_HELICASE_ACTIVITY	1.75026e-39
GO.0070936_PROTEIN_K48_LINKED_UBIQUITINATION	1.93711e-38
GO.0051028_MRNA_TRANSPORT	4.37516e-37
GO.0006310_DNA_RECOMBINATION	2.01673e-36
GO.0016607_NUCLEAR_SPECK	1.05138e-35
GO.0008380_RNA_SPLICING	1.74952e-35
GO.0000775_CHROMOSOME._CENTROMERIC_REGION	3.81847e-34
GO.0006396_RNA_PROCESSING	6.51339e-34
GO.0000079_REGULATION_OF_CYCLIN_DEPENDENT_PROTEIN_KINASE_ACTIVITY	6.87755e-34
GO.0005681_SPLICEOSOMAL_COMPLEX	1.48225e-31
GO.0006974_RESPONSE_TO_DNA_DAMAGE_STIMULUS	9.85175e-30
GO.0006417_REGULATION_OF_TRANSLATION	4.57459e-29
GO.0000776_KINETOCHORE	5.53236e-27
GO.0016568_CHROMATIN_MODIFICATION	9.69964e-27
GO.0016592_MEDIATOR_COMPLEX	5.22375e-26
GO.0008033_TRNA_PROCESSING	5.42579e-26
GO.0016881_ACID_AMINO_ACID_LIGASE_ACTIVITY	8.55831e-22
GO.0008094_DNA_DEPENDENT_ATPASE_ACTIVITY	4.18623e-19
GO.0010212_RESPONSE_TO_IONIZING_RADIATION	4.85485e-17
GO.0003777_MICROTUBULE_MOTOR_ACTIVITY	1.48285e-15
GO.0008287_PROTEIN_SERINE_THREONINE_PHOSPHATASE_COMPLEX	1.97569e-13
GO.0005689_U12_TYPE_SPLICEOSOMAL_COMPLEX	5.20824e-12
GO.0004221_UBIQUITIN_THIOLESTERASE_ACTIVITY	7.85555e-11
GO.0004722_PROTEIN_SERINE_THREONINE_PHOSPHATASE_ACTIVITY	6.76516e-10
GO.0007059_CHROMOSOME_SEGREGATION	1.74629e-08
GO.0007498_MESODERM_DEVELOPMENT	4.98034e-08
GO.0042393_HISTONE_BINDING	0.000158652
GO.0006260_DNA_REPLICATION	0.000383343
GO.0003723_RNA_BINDING	0.000426058
GO.0003143_EMBRYONIC_HEART_TUBE_MORPHOGENESIS	0.000452845
GO.0032259_METHYLATION	0.000771644
GO.0004721_PHOSPHOPROTEIN_PHOSPHATASE_ACTIVITY	0.00128373
GO.0016817_HYDROLASE_ACTIVITY._ACTING_ON_ACID_ANHYDRIDES	0.00242721
GO.0003682_CHROMATIN_BINDING	0.196755
GO.0003725_DOUBLE_STRANDED_RNA_BINDING	0.783537
GO.0003899_DNA_DIRECTED_RNA_POLYMERASE_ACTIVITY	1
GO.0005730_NUCLEOLUS	1
GO.0000786_NUCLEOSOME	1
GO.0001756_SOMITOGENESIS	1
GO.0006334_NUCLEOSOME_ASSEMBLY	1
GO.0006366_TRANSCRIPTION_FROM_RNA_POLYMERASE_II_PROMOTER	1
GO.0009880_EMBRYONIC_PATTERN_SPECIFICATION	1
GO.0009952_ANTERIOR_POSTERIOR_PATTERN_FORMATION	1
GO.0009953_DORSAL_VENTRAL_PATTERN_FORMATION	1
GO.0030901_MIDBRAIN_DEVELOPMENT	1
GO.0042074_CELL_MIGRATION_INVOLVED_IN_GASTRULATION	1
GO.0042254_RIBOSOME_BIOGENESIS	1
GO.0043049_OTIC_PLACODE_FORMATION	1
GO.0000122_NEGATIVE_REGULATION_OF_TRANSCRIPTION_FROM_RNA_POLYMERASE_II_PROMOTER	1
GO.0000209_PROTEIN_POLYUBIQUITINATION	1
GO.0000785_CHROMATIN	1
GO.0000910_CYTOKINESIS	1
GO.0000922_SPINDLE_POLE	1
GO.0001666_RESPONSE_TO_HYPOXIA	1
GO.0001755_NEURAL_CREST_CELL_MIGRATION	1
GO.0001947_HEART_LOOPING	1
GO.0003007_HEART_MORPHOGENESIS	1
GO.0003714_TRANSCRIPTION_COREPRESSOR_ACTIVITY	1
GO.0003779_ACTIN_BINDING	1
GO.0004177_AMINOPEPTIDASE_ACTIVITY	1
GO.0004180_CARBOXYPEPTIDASE_ACTIVITY	1
GO.0004252_SERINE_TYPE_ENDOPEPTIDASE_ACTIVITY	1
GO.0004527_EXONUCLEASE_ACTIVITY	1
GO.0004553_HYDROLASE_ACTIVITY._HYDROLYZING_O_GLYCOSYL_COMPOUNDS	1
GO.0004713_PROTEIN_TYROSINE_KINASE_ACTIVITY	1
GO.0004871_SIGNAL_TRANSDUCER_ACTIVITY	1
GO.0004888_TRANSMEMBRANE_RECEPTOR_ACTIVITY	1
GO.0005102_RECEPTOR_BINDING	1
GO.0005267_POTASSIUM_CHANNEL_ACTIVITY	1
GO.0005385_ZINC_ION_TRANSMEMBRANE_TRANSPORTER_ACTIVITY	1
GO.0005624_MEMBRANE_FRACTION	1
GO.0005667_TRANSCRIPTION_FACTOR_COMPLEX	1
GO.0005739_MITOCHONDRION	1
GO.0005743_MITOCHONDRIAL_INNER_MEMBRANE	1
GO.0005765_LYSOSOMAL_MEMBRANE	1
GO.0005777_PEROXISOME	1
GO.0005792_MICROSOME	1
GO.0005815_MICROTUBULE_ORGANIZING_CENTER	1
GO.0005819_SPINDLE	1
GO.0005874_MICROTUBULE	1
GO.0005876_SPINDLE_MICROTUBULE	1
GO.0005886_PLASMA_MEMBRANE	1
GO.0005921_GAP_JUNCTION	1
GO.0005922_CONNEXON_COMPLEX	1
GO.0006289_NUCLEOTIDE_EXCISION_REPAIR	1
GO.0006414_TRANSLATIONAL_ELONGATION	1
GO.0006457_PROTEIN_FOLDING	1
GO.0006468_PROTEIN_PHOSPHORYLATION	1
GO.0006511_UBIQUITIN_DEPENDENT_PROTEIN_CATABOLIC_PROCESS	1
GO.0006629_LIPID_METABOLIC_PROCESS	1
GO.0006633_FATTY_ACID_BIOSYNTHETIC_PROCESS	1
GO.0006662_GLYCEROL_ETHER_METABOLIC_PROCESS	1
GO.0006730_ONE_CARBON_METABOLIC_PROCESS	1
GO.0006816_CALCIUM_ION_TRANSPORT	1
GO.0006950_RESPONSE_TO_STRESS	1
GO.0006955_IMMUNE_RESPONSE	1
GO.0006979_RESPONSE_TO_OXIDATIVE_STRESS	1
GO.0007017_MICROTUBULE_BASED_PROCESS	1
GO.0007018_MICROTUBULE_BASED_MOVEMENT	1
GO.0007154_CELL_COMMUNICATION	1
GO.0007160_CELL_MATRIX_ADHESION	1
GO.0007166_CELL_SURFACE_RECEPTOR_LINKED_SIGNALING_PATHWAY	1
GO.0007179_TRANSFORMING_GROWTH_FACTOR_BETA_RECEPTOR_SIGNALING_PATHWAY	1
GO.0007283_SPERMATOGENESIS	1
GO.0007368_DETERMINATION_OF_LEFT_RIGHT_SYMMETRY	1
GO.0007399_NERVOUS_SYSTEM_DEVELOPMENT	1
GO.0007507_HEART_DEVELOPMENT	1
GO.0008017_MICROTUBULE_BINDING	1
GO.0008022_PROTEIN_C_TERMINUS_BINDING	1
GO.0008134_TRANSCRIPTION_FACTOR_BINDING	1
GO.0008146_SULFOTRANSFERASE_ACTIVITY	1
GO.0008152_METABOLIC_PROCESS	1
GO.0008168_METHYLTRANSFERASE_ACTIVITY	1
GO.0008201_HEPARIN_BINDING	1
GO.0008236_SERINE_TYPE_PEPTIDASE_ACTIVITY	1
GO.0008237_METALLOPEPTIDASE_ACTIVITY	1
GO.0008373_SIALYLTRANSFERASE_ACTIVITY	1
GO.0008610_LIPID_BIOSYNTHETIC_PROCESS	1
GO.0009055_ELECTRON_CARRIER_ACTIVITY	1
GO.0009408_RESPONSE_TO_HEAT	1
GO.0009615_RESPONSE_TO_VIRUS	1
GO.0009897_EXTERNAL_SIDE_OF_PLASMA_MEMBRANE	1
GO.0015662_ATPASE_ACTIVITY._COUPLED_TO_TRANSMEMBRANE_MOVEMENT_OF_IONS._PHOSPHORYLATIVE_MECHANISM	1
GO.0016311_DEPHOSPHORYLATION	1
GO.0016477_CELL_MIGRATION	1
GO.0016605_PML_BODY	1
GO.0016616_OXIDOREDUCTASE_ACTIVITY._ACTING_ON_THE_CH_OH_GROUP_OF_DONORS._NAD_OR_NADP_AS_ACCEPTOR	1
GO.0016702_OXIDOREDUCTASE_ACTIVITY._ACTING_ON_SINGLE_DONORS_WITH_INCORPORATION_OF_MOLECULAR_OXYGEN._INCORPORATION_OF_TWO_ATOMS_OF_OXYGEN	1
GO.0016772_TRANSFERASE_ACTIVITY._TRANSFERRING_PHOSPHORUS_CONTAINING_GROUPS	1
GO.0016779_NUCLEOTIDYLTRANSFERASE_ACTIVITY	1
GO.0016791_PHOSPHATASE_ACTIVITY	1
GO.0016810_HYDROLASE_ACTIVITY._ACTING_ON_CARBON_NITROGEN_.BUT_NOT_PEPTIDE._BONDS	1
GO.0018024_HISTONE_LYSINE_N_METHYLTRANSFERASE_ACTIVITY	1
GO.0019001_GUANYL_NUCLEOTIDE_BINDING	1
GO.0019899_ENZYME_BINDING	1
GO.0019901_PROTEIN_KINASE_BINDING	1
GO.0022857_TRANSMEMBRANE_TRANSPORTER_ACTIVITY	1
GO.0030097_HEMOPOIESIS	1
GO.0030163_PROTEIN_CATABOLIC_PROCESS	1
GO.0030170_PYRIDOXAL_PHOSPHATE_BINDING	1
GO.0030176_INTEGRAL_TO_ENDOPLASMIC_RETICULUM_MEMBRANE	1
GO.0030218_ERYTHROCYTE_DIFFERENTIATION	1
GO.0030308_NEGATIVE_REGULATION_OF_CELL_GROWTH	1
GO.0031016_PANCREAS_DEVELOPMENT	1
GO.0031017_EXOCRINE_PANCREAS_DEVELOPMENT	1
GO.0031101_FIN_REGENERATION	1
GO.0031965_NUCLEAR_MEMBRANE	1
GO.0032313_REGULATION_OF_RAB_GTPASE_ACTIVITY	1
GO.0035091_PHOSPHATIDYLINOSITOL_BINDING	1
GO.0035162_EMBRYONIC_HEMOPOIESIS	1
GO.0040007_GROWTH	1
GO.0042826_HISTONE_DEACETYLASE_BINDING	1
GO.0043010_CAMERA_TYPE_EYE_DEVELOPMENT	1
GO.0043169_CATION_BINDING	1
GO.0043234_PROTEIN_COMPLEX	1
GO.0043966_HISTONE_H3_ACETYLATION	1
GO.0045087_INNATE_IMMUNE_RESPONSE	1
GO.0045892_NEGATIVE_REGULATION_OF_TRANSCRIPTION._DNA_DEPENDENT	1
GO.0048514_BLOOD_VESSEL_MORPHOGENESIS	1
GO.0048703_EMBRYONIC_VISCEROCRANIUM_MORPHOGENESIS	1
GO.0048793_PRONEPHROS_DEVELOPMENT	1
GO.0050660_FLAVIN_ADENINE_DINUCLEOTIDE_BINDING	1
GO.0050821_PROTEIN_STABILIZATION	1
GO.0051082_UNFOLDED_PROTEIN_BINDING	1
GO.0051216_CARTILAGE_DEVELOPMENT	1
GO.0051537_2_IRON._2_SULFUR_CLUSTER_BINDING	1
GO.0051539_4_IRON._4_SULFUR_CLUSTER_BINDING	1
GO.0051592_RESPONSE_TO_CALCIUM_ION	1
GO.0051726_REGULATION_OF_CELL_CYCLE	1
GO.0055085_TRANSMEMBRANE_TRANSPORT	1
GO.0060026_CONVERGENT_EXTENSION	1
GO.0060028_CONVERGENT_EXTENSION_INVOLVED_IN_AXIS_ELONGATION	1
GO.0070588_CALCIUM_ION_TRANSMEMBRANE_TRANSPORT	1
GO.0071805_POTASSIUM_ION_TRANSMEMBRANE_TRANSPORT	1
GO.0090090_NEGATIVE_REGULATION_OF_CANONICAL_WNT_RECEPTOR_SIGNALING_PATHWAY	1
GO.0001525_ANGIOGENESIS	1
GO.0001568_BLOOD_VESSEL_DEVELOPMENT	1
GO.0001570_VASCULOGENESIS	1
GO.0001764_NEURON_MIGRATION	1
GO.0001889_LIVER_DEVELOPMENT	1
GO.0002040_SPROUTING_ANGIOGENESIS	1
GO.0003684_DAMAGED_DNA_BINDING	1
GO.0003713_TRANSCRIPTION_COACTIVATOR_ACTIVITY	1
GO.0003729_MRNA_BINDING	1
GO.0004672_PROTEIN_KINASE_ACTIVITY	1
GO.0004674_PROTEIN_SERINE_THREONINE_KINASE_ACTIVITY	1
GO.0004842_UBIQUITIN_PROTEIN_LIGASE_ACTIVITY	1
GO.0005044_SCAVENGER_RECEPTOR_ACTIVITY	1
GO.0005506_IRON_ION_BINDING	1
GO.0005507_COPPER_ION_BINDING	1
GO.0005654_NUCLEOPLASM	1
GO.0006418_TRNA_AMINOACYLATION_FOR_PROTEIN_TRANSLATION	1
GO.0006754_ATP_BIOSYNTHETIC_PROCESS	1
GO.0006812_CATION_TRANSPORT	1
GO.0007169_TRANSMEMBRANE_RECEPTOR_PROTEIN_TYROSINE_KINASE_SIGNALING_PATHWAY	1
GO.0007219_NOTCH_SIGNALING_PATHWAY	1
GO.0007229_INTEGRIN_MEDIATED_SIGNALING_PATHWAY	1
GO.0007243_INTRACELLULAR_PROTEIN_KINASE_CASCADE	1
GO.0007420_BRAIN_DEVELOPMENT	1
GO.0007596_BLOOD_COAGULATION	1
GO.0008045_MOTOR_AXON_GUIDANCE	1
GO.0008284_POSITIVE_REGULATION_OF_CELL_PROLIFERATION	1
GO.0008305_INTEGRIN_COMPLEX	1
GO.0016055_WNT_RECEPTOR_SIGNALING_PATHWAY	1
GO.0016705_OXIDOREDUCTASE_ACTIVITY._ACTING_ON_PAIRED_DONORS._WITH_INCORPORATION_OR_REDUCTION_OF_MOLECULAR_OXYGEN	1
GO.0019825_OXYGEN_BINDING	1
GO.0019904_PROTEIN_DOMAIN_SPECIFIC_BINDING	1
GO.0020037_HEME_BINDING	1
GO.0030182_NEURON_DIFFERENTIATION	1
GO.0030917_MIDBRAIN_HINDBRAIN_BOUNDARY_DEVELOPMENT	1
GO.0031290_RETINAL_GANGLION_CELL_AXON_GUIDANCE	1
GO.0031410_CYTOPLASMIC_VESICLE	1
GO.0042493_RESPONSE_TO_DRUG	1
GO.0045944_POSITIVE_REGULATION_OF_TRANSCRIPTION_FROM_RNA_POLYMERASE_II_PROMOTER	1
GO.0050896_RESPONSE_TO_STIMULUS	1
GO.0051287_NAD_BINDING	1
GO.0060041_RETINA_DEVELOPMENT_IN_CAMERA_TYPE_EYE	1
GO.0060047_HEART_CONTRACTION	1
GO.0000502_PROTEASOME_COMPLEX	1
GO.0003743_TRANSLATION_INITIATION_FACTOR_ACTIVITY	1
GO.0004175_ENDOPEPTIDASE_ACTIVITY	1
GO.0004298_THREONINE_TYPE_ENDOPEPTIDASE_ACTIVITY	1
GO.0004812_AMINOACYL_TRNA_LIGASE_ACTIVITY	1
GO.0005839_PROTEASOME_CORE_COMPLEX	1
GO.0006364_RRNA_PROCESSING	1
GO.0006413_TRANSLATIONAL_INITIATION	1
GO.0007517_MUSCLE_ORGAN_DEVELOPMENT	1
GO.0030900_FOREBRAIN_DEVELOPMENT	1
GO.0030902_HINDBRAIN_DEVELOPMENT	1
GO.0030903_NOTOCHORD_DEVELOPMENT	1
GO.0042221_RESPONSE_TO_CHEMICAL_STIMULUS	1
GO.0051603_PROTEOLYSIS_INVOLVED_IN_CELLULAR_PROTEIN_CATABOLIC_PROCESS	1
GO.0003735_STRUCTURAL_CONSTITUENT_OF_RIBOSOME	1
GO.0005509_CALCIUM_ION_BINDING	1
GO.0005578_PROTEINACEOUS_EXTRACELLULAR_MATRIX	1
GO.0005747_MITOCHONDRIAL_RESPIRATORY_CHAIN_COMPLEX_I	1
GO.0005840_RIBOSOME	1
GO.0006412_TRANSLATION	1
GO.0007275_MULTICELLULAR_ORGANISMAL_DEVELOPMENT	1
GO.0015986_ATP_SYNTHESIS_COUPLED_PROTON_TRANSPORT	1
GO.0015992_PROTON_TRANSPORT	1
GO.0022627_CYTOSOLIC_SMALL_RIBOSOMAL_SUBUNIT	1
GO.0030529_RIBONUCLEOPROTEIN_COMPLEX	1
GO.0031012_EXTRACELLULAR_MATRIX	1
GO.0043565_SEQUENCE_SPECIFIC_DNA_BINDING	1
GO.0004129_CYTOCHROME_C_OXIDASE_ACTIVITY	1
GO.0005198_STRUCTURAL_MOLECULE_ACTIVITY	1
GO.0005215_TRANSPORTER_ACTIVITY	1
GO.0005576_EXTRACELLULAR_REGION	1
GO.0005581_COLLAGEN	1
GO.0005615_EXTRACELLULAR_SPACE	1
GO.0006096_GLYCOLYSIS	1
GO.0006099_TRICARBOXYLIC_ACID_CYCLE	1
GO.0007155_CELL_ADHESION	1
GO.0007223_WNT_RECEPTOR_SIGNALING_PATHWAY._CALCIUM_MODULATING_PATHWAY	1
GO.0007411_AXON_GUIDANCE	1
GO.0007601_VISUAL_PERCEPTION	1
GO.0008083_GROWTH_FACTOR_ACTIVITY	1
GO.0015991_ATP_HYDROLYSIS_COUPLED_PROTON_TRANSPORT	1
GO.0045202_SYNAPSE	1
GO.0046933_HYDROGEN_ION_TRANSPORTING_ATP_SYNTHASE_ACTIVITY._ROTATIONAL_MECHANISM	1
GO.0001558_REGULATION_OF_CELL_GROWTH	1
GO.0004714_TRANSMEMBRANE_RECEPTOR_PROTEIN_TYROSINE_KINASE_ACTIVITY	1
GO.0004867_SERINE_TYPE_ENDOPEPTIDASE_INHIBITOR_ACTIVITY	1
GO.0005179_HORMONE_ACTIVITY	1
GO.0005216_ION_CHANNEL_ACTIVITY	1
GO.0005230_EXTRACELLULAR_LIGAND_GATED_ION_CHANNEL_ACTIVITY	1
GO.0005244_VOLTAGE_GATED_ION_CHANNEL_ACTIVITY	1
GO.0005520_INSULIN_LIKE_GROWTH_FACTOR_BINDING	1
GO.0005544_CALCIUM_DEPENDENT_PHOSPHOLIPID_BINDING	1
GO.0005882_INTERMEDIATE_FILAMENT	1
GO.0006811_ION_TRANSPORT	1
GO.0007156_HOMOPHILIC_CELL_ADHESION	1
GO.0008021_SYNAPTIC_VESICLE	1
GO.0009790_EMBRYO_DEVELOPMENT	1
GO.0009986_CELL_SURFACE	1
GO.0015078_HYDROGEN_ION_TRANSMEMBRANE_TRANSPORTER_ACTIVITY	1
GO.0030054_CELL_JUNCTION	1
GO.0034765_REGULATION_OF_ION_TRANSMEMBRANE_TRANSPORT	1
GO.0045211_POSTSYNAPTIC_MEMBRANE	1
GO.0051258_PROTEIN_POLYMERIZATION	1
GO.0003707_STEROID_HORMONE_RECEPTOR_ACTIVITY	1
GO.0004497_MONOOXYGENASE_ACTIVITY	1
GO.0004879_LIGAND_DEPENDENT_NUCLEAR_RECEPTOR_ACTIVITY	1
GO.0004896_CYTOKINE_RECEPTOR_ACTIVITY	1
GO.0004930_G_PROTEIN_COUPLED_RECEPTOR_ACTIVITY	1
GO.0005249_VOLTAGE_GATED_POTASSIUM_CHANNEL_ACTIVITY	1
GO.0005887_INTEGRAL_TO_PLASMA_MEMBRANE	1
GO.0006813_POTASSIUM_ION_TRANSPORT	1
GO.0006814_SODIUM_ION_TRANSPORT	1
GO.0006821_CHLORIDE_TRANSPORT	1
GO.0006836_NEUROTRANSMITTER_TRANSPORT	1
GO.0007186_G_PROTEIN_COUPLED_RECEPTOR_PROTEIN_SIGNALING_PATHWAY	1
GO.0007218_NEUROPEPTIDE_SIGNALING_PATHWAY	1
GO.0008076_VOLTAGE_GATED_POTASSIUM_CHANNEL_COMPLEX	1
GO.0008289_LIPID_BINDING	1
GO.0008483_TRANSAMINASE_ACTIVITY	1
GO.0015293_SYMPORTER_ACTIVITY	1
GO.0016491_OXIDOREDUCTASE_ACTIVITY	1
GO.0016627_OXIDOREDUCTASE_ACTIVITY._ACTING_ON_THE_CH_CH_GROUP_OF_DONORS	1
GO.0022900_ELECTRON_TRANSPORT_CHAIN	1
GO.0043401_STEROID_HORMONE_MEDIATED_SIGNALING_PATHWAY	1
GO.0055114_OXIDATION_REDUCTION_PROCESS	1

## Sheet: bt.9
x
GO.0006974_RESPONSE_TO_DNA_DAMAGE_STIMULUS	3.71041e-78
GO.0042393_HISTONE_BINDING	2.88589e-72
GO.0051301_CELL_DIVISION	9.90564e-68
GO.0004674_PROTEIN_SERINE_THREONINE_KINASE_ACTIVITY	1.0182e-49
GO.0006281_DNA_REPAIR	6.27676e-44
GO.0016817_HYDROLASE_ACTIVITY._ACTING_ON_ACID_ANHYDRIDES	7.45512e-40
GO.0004842_UBIQUITIN_PROTEIN_LIGASE_ACTIVITY	8.54536e-40
GO.0005681_SPLICEOSOMAL_COMPLEX	2.03551e-36
GO.0008033_TRNA_PROCESSING	2.14382e-35
GO.0004672_PROTEIN_KINASE_ACTIVITY	2.22516e-30
GO.0004722_PROTEIN_SERINE_THREONINE_PHOSPHATASE_ACTIVITY	1.55271e-24
GO.0006468_PROTEIN_PHOSPHORYLATION	2.96297e-23
GO.0070936_PROTEIN_K48_LINKED_UBIQUITINATION	9.14826e-23
GO.0016568_CHROMATIN_MODIFICATION	1.22109e-20
GO.0010212_RESPONSE_TO_IONIZING_RADIATION	1.12028e-18
GO.0007067_MITOSIS	5.86723e-16
GO.0004386_HELICASE_ACTIVITY	1.35178e-14
GO.0000079_REGULATION_OF_CYCLIN_DEPENDENT_PROTEIN_KINASE_ACTIVITY	4.69046e-13
GO.0008287_PROTEIN_SERINE_THREONINE_PHOSPHATASE_COMPLEX	6.71533e-13
GO.0006367_TRANSCRIPTION_INITIATION_FROM_RNA_POLYMERASE_II_PROMOTER	3.70095e-11
GO.0008380_RNA_SPLICING	1.54861e-08
GO.0000775_CHROMOSOME._CENTROMERIC_REGION	5.26844e-06
GO.0000209_PROTEIN_POLYUBIQUITINATION	0.0101098
GO.0008094_DNA_DEPENDENT_ATPASE_ACTIVITY	0.0357216
GO.0007243_INTRACELLULAR_PROTEIN_KINASE_CASCADE	0.438892
GO.0005694_CHROMOSOME	1
GO.0006396_RNA_PROCESSING	1
GO.0006397_MRNA_PROCESSING	1
GO.0008026_ATP_DEPENDENT_HELICASE_ACTIVITY	1
GO.0016607_NUCLEAR_SPECK	1
GO.0000776_KINETOCHORE	1
GO.0003723_RNA_BINDING	1
GO.0003899_DNA_DIRECTED_RNA_POLYMERASE_ACTIVITY	1
GO.0005643_NUCLEAR_PORE	1
GO.0005689_U12_TYPE_SPLICEOSOMAL_COMPLEX	1
GO.0005730_NUCLEOLUS	1
GO.0006260_DNA_REPLICATION	1
GO.0006357_REGULATION_OF_TRANSCRIPTION_FROM_RNA_POLYMERASE_II_PROMOTER	1
GO.0007049_CELL_CYCLE	1
GO.0007498_MESODERM_DEVELOPMENT	1
GO.0016592_MEDIATOR_COMPLEX	1
GO.0051028_MRNA_TRANSPORT	1
GO.0000786_NUCLEOSOME	1
GO.0001756_SOMITOGENESIS	1
GO.0003143_EMBRYONIC_HEART_TUBE_MORPHOGENESIS	1
GO.0003682_CHROMATIN_BINDING	1
GO.0003777_MICROTUBULE_MOTOR_ACTIVITY	1
GO.0006310_DNA_RECOMBINATION	1
GO.0006334_NUCLEOSOME_ASSEMBLY	1
GO.0006366_TRANSCRIPTION_FROM_RNA_POLYMERASE_II_PROMOTER	1
GO.0006417_REGULATION_OF_TRANSLATION	1
GO.0007059_CHROMOSOME_SEGREGATION	1
GO.0009880_EMBRYONIC_PATTERN_SPECIFICATION	1
GO.0009952_ANTERIOR_POSTERIOR_PATTERN_FORMATION	1
GO.0009953_DORSAL_VENTRAL_PATTERN_FORMATION	1
GO.0030901_MIDBRAIN_DEVELOPMENT	1
GO.0042074_CELL_MIGRATION_INVOLVED_IN_GASTRULATION	1
GO.0042254_RIBOSOME_BIOGENESIS	1
GO.0043049_OTIC_PLACODE_FORMATION	1
GO.0000122_NEGATIVE_REGULATION_OF_TRANSCRIPTION_FROM_RNA_POLYMERASE_II_PROMOTER	1
GO.0000785_CHROMATIN	1
GO.0000910_CYTOKINESIS	1
GO.0000922_SPINDLE_POLE	1
GO.0001666_RESPONSE_TO_HYPOXIA	1
GO.0001755_NEURAL_CREST_CELL_MIGRATION	1
GO.0001947_HEART_LOOPING	1
GO.0003007_HEART_MORPHOGENESIS	1
GO.0003714_TRANSCRIPTION_COREPRESSOR_ACTIVITY	1
GO.0003725_DOUBLE_STRANDED_RNA_BINDING	1
GO.0003779_ACTIN_BINDING	1
GO.0004177_AMINOPEPTIDASE_ACTIVITY	1
GO.0004180_CARBOXYPEPTIDASE_ACTIVITY	1
GO.0004252_SERINE_TYPE_ENDOPEPTIDASE_ACTIVITY	1
GO.0004527_EXONUCLEASE_ACTIVITY	1
GO.0004553_HYDROLASE_ACTIVITY._HYDROLYZING_O_GLYCOSYL_COMPOUNDS	1
GO.0004713_PROTEIN_TYROSINE_KINASE_ACTIVITY	1
GO.0004721_PHOSPHOPROTEIN_PHOSPHATASE_ACTIVITY	1
GO.0004871_SIGNAL_TRANSDUCER_ACTIVITY	1
GO.0004888_TRANSMEMBRANE_RECEPTOR_ACTIVITY	1
GO.0005102_RECEPTOR_BINDING	1
GO.0005267_POTASSIUM_CHANNEL_ACTIVITY	1
GO.0005385_ZINC_ION_TRANSMEMBRANE_TRANSPORTER_ACTIVITY	1
GO.0005624_MEMBRANE_FRACTION	1
GO.0005667_TRANSCRIPTION_FACTOR_COMPLEX	1
GO.0005739_MITOCHONDRION	1
GO.0005743_MITOCHONDRIAL_INNER_MEMBRANE	1
GO.0005765_LYSOSOMAL_MEMBRANE	1
GO.0005777_PEROXISOME	1
GO.0005792_MICROSOME	1
GO.0005815_MICROTUBULE_ORGANIZING_CENTER	1
GO.0005819_SPINDLE	1
GO.0005874_MICROTUBULE	1
GO.0005876_SPINDLE_MICROTUBULE	1
GO.0005886_PLASMA_MEMBRANE	1
GO.0005921_GAP_JUNCTION	1
GO.0005922_CONNEXON_COMPLEX	1
GO.0006289_NUCLEOTIDE_EXCISION_REPAIR	1
GO.0006414_TRANSLATIONAL_ELONGATION	1
GO.0006457_PROTEIN_FOLDING	1
GO.0006511_UBIQUITIN_DEPENDENT_PROTEIN_CATABOLIC_PROCESS	1
GO.0006629_LIPID_METABOLIC_PROCESS	1
GO.0006633_FATTY_ACID_BIOSYNTHETIC_PROCESS	1
GO.0006662_GLYCEROL_ETHER_METABOLIC_PROCESS	1
GO.0006730_ONE_CARBON_METABOLIC_PROCESS	1
GO.0006816_CALCIUM_ION_TRANSPORT	1
GO.0006950_RESPONSE_TO_STRESS	1
GO.0006955_IMMUNE_RESPONSE	1
GO.0006979_RESPONSE_TO_OXIDATIVE_STRESS	1
GO.0007017_MICROTUBULE_BASED_PROCESS	1
GO.0007018_MICROTUBULE_BASED_MOVEMENT	1
GO.0007154_CELL_COMMUNICATION	1
GO.0007160_CELL_MATRIX_ADHESION	1
GO.0007166_CELL_SURFACE_RECEPTOR_LINKED_SIGNALING_PATHWAY	1
GO.0007179_TRANSFORMING_GROWTH_FACTOR_BETA_RECEPTOR_SIGNALING_PATHWAY	1
GO.0007283_SPERMATOGENESIS	1
GO.0007368_DETERMINATION_OF_LEFT_RIGHT_SYMMETRY	1
GO.0007399_NERVOUS_SYSTEM_DEVELOPMENT	1
GO.0007507_HEART_DEVELOPMENT	1
GO.0008017_MICROTUBULE_BINDING	1
GO.0008022_PROTEIN_C_TERMINUS_BINDING	1
GO.0008134_TRANSCRIPTION_FACTOR_BINDING	1
GO.0008146_SULFOTRANSFERASE_ACTIVITY	1
GO.0008152_METABOLIC_PROCESS	1
GO.0008168_METHYLTRANSFERASE_ACTIVITY	1
GO.0008201_HEPARIN_BINDING	1
GO.0008236_SERINE_TYPE_PEPTIDASE_ACTIVITY	1
GO.0008237_METALLOPEPTIDASE_ACTIVITY	1
GO.0008373_SIALYLTRANSFERASE_ACTIVITY	1
GO.0008610_LIPID_BIOSYNTHETIC_PROCESS	1
GO.0009055_ELECTRON_CARRIER_ACTIVITY	1
GO.0009408_RESPONSE_TO_HEAT	1
GO.0009615_RESPONSE_TO_VIRUS	1
GO.0009897_EXTERNAL_SIDE_OF_PLASMA_MEMBRANE	1
GO.0015662_ATPASE_ACTIVITY._COUPLED_TO_TRANSMEMBRANE_MOVEMENT_OF_IONS._PHOSPHORYLATIVE_MECHANISM	1
GO.0016311_DEPHOSPHORYLATION	1
GO.0016477_CELL_MIGRATION	1
GO.0016605_PML_BODY	1
GO.0016616_OXIDOREDUCTASE_ACTIVITY._ACTING_ON_THE_CH_OH_GROUP_OF_DONORS._NAD_OR_NADP_AS_ACCEPTOR	1
GO.0016702_OXIDOREDUCTASE_ACTIVITY._ACTING_ON_SINGLE_DONORS_WITH_INCORPORATION_OF_MOLECULAR_OXYGEN._INCORPORATION_OF_TWO_ATOMS_OF_OXYGEN	1
GO.0016772_TRANSFERASE_ACTIVITY._TRANSFERRING_PHOSPHORUS_CONTAINING_GROUPS	1
GO.0016779_NUCLEOTIDYLTRANSFERASE_ACTIVITY	1
GO.0016791_PHOSPHATASE_ACTIVITY	1
GO.0016810_HYDROLASE_ACTIVITY._ACTING_ON_CARBON_NITROGEN_.BUT_NOT_PEPTIDE._BONDS	1
GO.0016881_ACID_AMINO_ACID_LIGASE_ACTIVITY	1
GO.0018024_HISTONE_LYSINE_N_METHYLTRANSFERASE_ACTIVITY	1
GO.0019001_GUANYL_NUCLEOTIDE_BINDING	1
GO.0019899_ENZYME_BINDING	1
GO.0019901_PROTEIN_KINASE_BINDING	1
GO.0022857_TRANSMEMBRANE_TRANSPORTER_ACTIVITY	1
GO.0030097_HEMOPOIESIS	1
GO.0030163_PROTEIN_CATABOLIC_PROCESS	1
GO.0030170_PYRIDOXAL_PHOSPHATE_BINDING	1
GO.0030176_INTEGRAL_TO_ENDOPLASMIC_RETICULUM_MEMBRANE	1
GO.0030218_ERYTHROCYTE_DIFFERENTIATION	1
GO.0030308_NEGATIVE_REGULATION_OF_CELL_GROWTH	1
GO.0031016_PANCREAS_DEVELOPMENT	1
GO.0031017_EXOCRINE_PANCREAS_DEVELOPMENT	1
GO.0031101_FIN_REGENERATION	1
GO.0031965_NUCLEAR_MEMBRANE	1
GO.0032313_REGULATION_OF_RAB_GTPASE_ACTIVITY	1
GO.0035091_PHOSPHATIDYLINOSITOL_BINDING	1
GO.0035162_EMBRYONIC_HEMOPOIESIS	1
GO.0040007_GROWTH	1
GO.0042826_HISTONE_DEACETYLASE_BINDING	1
GO.0043010_CAMERA_TYPE_EYE_DEVELOPMENT	1
GO.0043169_CATION_BINDING	1
GO.0043234_PROTEIN_COMPLEX	1
GO.0043966_HISTONE_H3_ACETYLATION	1
GO.0045087_INNATE_IMMUNE_RESPONSE	1
GO.0045892_NEGATIVE_REGULATION_OF_TRANSCRIPTION._DNA_DEPENDENT	1
GO.0048514_BLOOD_VESSEL_MORPHOGENESIS	1
GO.0048703_EMBRYONIC_VISCEROCRANIUM_MORPHOGENESIS	1
GO.0048793_PRONEPHROS_DEVELOPMENT	1
GO.0050660_FLAVIN_ADENINE_DINUCLEOTIDE_BINDING	1
GO.0050821_PROTEIN_STABILIZATION	1
GO.0051082_UNFOLDED_PROTEIN_BINDING	1
GO.0051216_CARTILAGE_DEVELOPMENT	1
GO.0051537_2_IRON._2_SULFUR_CLUSTER_BINDING	1
GO.0051539_4_IRON._4_SULFUR_CLUSTER_BINDING	1
GO.0051592_RESPONSE_TO_CALCIUM_ION	1
GO.0051726_REGULATION_OF_CELL_CYCLE	1
GO.0055085_TRANSMEMBRANE_TRANSPORT	1
GO.0060026_CONVERGENT_EXTENSION	1
GO.0060028_CONVERGENT_EXTENSION_INVOLVED_IN_AXIS_ELONGATION	1
GO.0070588_CALCIUM_ION_TRANSMEMBRANE_TRANSPORT	1
GO.0071805_POTASSIUM_ION_TRANSMEMBRANE_TRANSPORT	1
GO.0090090_NEGATIVE_REGULATION_OF_CANONICAL_WNT_RECEPTOR_SIGNALING_PATHWAY	1
GO.0001525_ANGIOGENESIS	1
GO.0001568_BLOOD_VESSEL_DEVELOPMENT	1
GO.0001570_VASCULOGENESIS	1
GO.0001764_NEURON_MIGRATION	1
GO.0001889_LIVER_DEVELOPMENT	1
GO.0002040_SPROUTING_ANGIOGENESIS	1
GO.0003684_DAMAGED_DNA_BINDING	1
GO.0003713_TRANSCRIPTION_COACTIVATOR_ACTIVITY	1
GO.0003729_MRNA_BINDING	1
GO.0004221_UBIQUITIN_THIOLESTERASE_ACTIVITY	1
GO.0005044_SCAVENGER_RECEPTOR_ACTIVITY	1
GO.0005506_IRON_ION_BINDING	1
GO.0005507_COPPER_ION_BINDING	1
GO.0005654_NUCLEOPLASM	1
GO.0006418_TRNA_AMINOACYLATION_FOR_PROTEIN_TRANSLATION	1
GO.0006754_ATP_BIOSYNTHETIC_PROCESS	1
GO.0006812_CATION_TRANSPORT	1
GO.0007169_TRANSMEMBRANE_RECEPTOR_PROTEIN_TYROSINE_KINASE_SIGNALING_PATHWAY	1
GO.0007219_NOTCH_SIGNALING_PATHWAY	1
GO.0007229_INTEGRIN_MEDIATED_SIGNALING_PATHWAY	1
GO.0007420_BRAIN_DEVELOPMENT	1
GO.0007596_BLOOD_COAGULATION	1
GO.0008045_MOTOR_AXON_GUIDANCE	1
GO.0008284_POSITIVE_REGULATION_OF_CELL_PROLIFERATION	1
GO.0008305_INTEGRIN_COMPLEX	1
GO.0016055_WNT_RECEPTOR_SIGNALING_PATHWAY	1
GO.0016705_OXIDOREDUCTASE_ACTIVITY._ACTING_ON_PAIRED_DONORS._WITH_INCORPORATION_OR_REDUCTION_OF_MOLECULAR_OXYGEN	1
GO.0019825_OXYGEN_BINDING	1
GO.0019904_PROTEIN_DOMAIN_SPECIFIC_BINDING	1
GO.0020037_HEME_BINDING	1
GO.0030182_NEURON_DIFFERENTIATION	1
GO.0030917_MIDBRAIN_HINDBRAIN_BOUNDARY_DEVELOPMENT	1
GO.0031290_RETINAL_GANGLION_CELL_AXON_GUIDANCE	1
GO.0031410_CYTOPLASMIC_VESICLE	1
GO.0032259_METHYLATION	1
GO.0042493_RESPONSE_TO_DRUG	1
GO.0045944_POSITIVE_REGULATION_OF_TRANSCRIPTION_FROM_RNA_POLYMERASE_II_PROMOTER	1
GO.0050896_RESPONSE_TO_STIMULUS	1
GO.0051287_NAD_BINDING	1
GO.0060041_RETINA_DEVELOPMENT_IN_CAMERA_TYPE_EYE	1
GO.0060047_HEART_CONTRACTION	1
GO.0000502_PROTEASOME_COMPLEX	1
GO.0003743_TRANSLATION_INITIATION_FACTOR_ACTIVITY	1
GO.0004175_ENDOPEPTIDASE_ACTIVITY	1
GO.0004298_THREONINE_TYPE_ENDOPEPTIDASE_ACTIVITY	1
GO.0004812_AMINOACYL_TRNA_LIGASE_ACTIVITY	1
GO.0005839_PROTEASOME_CORE_COMPLEX	1
GO.0006364_RRNA_PROCESSING	1
GO.0006413_TRANSLATIONAL_INITIATION	1
GO.0007517_MUSCLE_ORGAN_DEVELOPMENT	1
GO.0030900_FOREBRAIN_DEVELOPMENT	1
GO.0030902_HINDBRAIN_DEVELOPMENT	1
GO.0030903_NOTOCHORD_DEVELOPMENT	1
GO.0042221_RESPONSE_TO_CHEMICAL_STIMULUS	1
GO.0051603_PROTEOLYSIS_INVOLVED_IN_CELLULAR_PROTEIN_CATABOLIC_PROCESS	1
GO.0003735_STRUCTURAL_CONSTITUENT_OF_RIBOSOME	1
GO.0005509_CALCIUM_ION_BINDING	1
GO.0005578_PROTEINACEOUS_EXTRACELLULAR_MATRIX	1
GO.0005747_MITOCHONDRIAL_RESPIRATORY_CHAIN_COMPLEX_I	1
GO.0005840_RIBOSOME	1
GO.0006412_TRANSLATION	1
GO.0007275_MULTICELLULAR_ORGANISMAL_DEVELOPMENT	1
GO.0015986_ATP_SYNTHESIS_COUPLED_PROTON_TRANSPORT	1
GO.0015992_PROTON_TRANSPORT	1
GO.0022627_CYTOSOLIC_SMALL_RIBOSOMAL_SUBUNIT	1
GO.0030529_RIBONUCLEOPROTEIN_COMPLEX	1
GO.0031012_EXTRACELLULAR_MATRIX	1
GO.0043565_SEQUENCE_SPECIFIC_DNA_BINDING	1
GO.0004129_CYTOCHROME_C_OXIDASE_ACTIVITY	1
GO.0005198_STRUCTURAL_MOLECULE_ACTIVITY	1
GO.0005215_TRANSPORTER_ACTIVITY	1
GO.0005576_EXTRACELLULAR_REGION	1
GO.0005581_COLLAGEN	1
GO.0005615_EXTRACELLULAR_SPACE	1
GO.0006096_GLYCOLYSIS	1
GO.0006099_TRICARBOXYLIC_ACID_CYCLE	1
GO.0007155_CELL_ADHESION	1
GO.0007223_WNT_RECEPTOR_SIGNALING_PATHWAY._CALCIUM_MODULATING_PATHWAY	1
GO.0007411_AXON_GUIDANCE	1
GO.0007601_VISUAL_PERCEPTION	1
GO.0008083_GROWTH_FACTOR_ACTIVITY	1
GO.0015991_ATP_HYDROLYSIS_COUPLED_PROTON_TRANSPORT	1
GO.0045202_SYNAPSE	1
GO.0046933_HYDROGEN_ION_TRANSPORTING_ATP_SYNTHASE_ACTIVITY._ROTATIONAL_MECHANISM	1
GO.0001558_REGULATION_OF_CELL_GROWTH	1
GO.0004714_TRANSMEMBRANE_RECEPTOR_PROTEIN_TYROSINE_KINASE_ACTIVITY	1
GO.0004867_SERINE_TYPE_ENDOPEPTIDASE_INHIBITOR_ACTIVITY	1
GO.0005179_HORMONE_ACTIVITY	1
GO.0005216_ION_CHANNEL_ACTIVITY	1
GO.0005230_EXTRACELLULAR_LIGAND_GATED_ION_CHANNEL_ACTIVITY	1
GO.0005244_VOLTAGE_GATED_ION_CHANNEL_ACTIVITY	1
GO.0005520_INSULIN_LIKE_GROWTH_FACTOR_BINDING	1
GO.0005544_CALCIUM_DEPENDENT_PHOSPHOLIPID_BINDING	1
GO.0005882_INTERMEDIATE_FILAMENT	1
GO.0006811_ION_TRANSPORT	1
GO.0007156_HOMOPHILIC_CELL_ADHESION	1
GO.0008021_SYNAPTIC_VESICLE	1
GO.0009790_EMBRYO_DEVELOPMENT	1
GO.0009986_CELL_SURFACE	1
GO.0015078_HYDROGEN_ION_TRANSMEMBRANE_TRANSPORTER_ACTIVITY	1
GO.0030054_CELL_JUNCTION	1
GO.0034765_REGULATION_OF_ION_TRANSMEMBRANE_TRANSPORT	1
GO.0045211_POSTSYNAPTIC_MEMBRANE	1
GO.0051258_PROTEIN_POLYMERIZATION	1
GO.0003707_STEROID_HORMONE_RECEPTOR_ACTIVITY	1
GO.0004497_MONOOXYGENASE_ACTIVITY	1
GO.0004879_LIGAND_DEPENDENT_NUCLEAR_RECEPTOR_ACTIVITY	1
GO.0004896_CYTOKINE_RECEPTOR_ACTIVITY	1
GO.0004930_G_PROTEIN_COUPLED_RECEPTOR_ACTIVITY	1
GO.0005249_VOLTAGE_GATED_POTASSIUM_CHANNEL_ACTIVITY	1
GO.0005887_INTEGRAL_TO_PLASMA_MEMBRANE	1
GO.0006813_POTASSIUM_ION_TRANSPORT	1
GO.0006814_SODIUM_ION_TRANSPORT	1
GO.0006821_CHLORIDE_TRANSPORT	1
GO.0006836_NEUROTRANSMITTER_TRANSPORT	1
GO.0007186_G_PROTEIN_COUPLED_RECEPTOR_PROTEIN_SIGNALING_PATHWAY	1
GO.0007218_NEUROPEPTIDE_SIGNALING_PATHWAY	1
GO.0008076_VOLTAGE_GATED_POTASSIUM_CHANNEL_COMPLEX	1
GO.0008289_LIPID_BINDING	1
GO.0008483_TRANSAMINASE_ACTIVITY	1
GO.0015293_SYMPORTER_ACTIVITY	1
GO.0016491_OXIDOREDUCTASE_ACTIVITY	1
GO.0016627_OXIDOREDUCTASE_ACTIVITY._ACTING_ON_THE_CH_CH_GROUP_OF_DONORS	1
GO.0022900_ELECTRON_TRANSPORT_CHAIN	1
GO.0043401_STEROID_HORMONE_MEDIATED_SIGNALING_PATHWAY	1
GO.0055114_OXIDATION_REDUCTION_PROCESS	1

## Sheet: bt.10
x
GO.0042393_HISTONE_BINDING	1.37032e-05
GO.0004386_HELICASE_ACTIVITY	1
GO.0005681_SPLICEOSOMAL_COMPLEX	1
GO.0005694_CHROMOSOME	1
GO.0006281_DNA_REPAIR	1
GO.0006396_RNA_PROCESSING	1
GO.0006397_MRNA_PROCESSING	1
GO.0006974_RESPONSE_TO_DNA_DAMAGE_STIMULUS	1
GO.0008026_ATP_DEPENDENT_HELICASE_ACTIVITY	1
GO.0008380_RNA_SPLICING	1
GO.0016607_NUCLEAR_SPECK	1
GO.0051301_CELL_DIVISION	1
GO.0000775_CHROMOSOME._CENTROMERIC_REGION	1
GO.0000776_KINETOCHORE	1
GO.0003723_RNA_BINDING	1
GO.0003899_DNA_DIRECTED_RNA_POLYMERASE_ACTIVITY	1
GO.0005643_NUCLEAR_PORE	1
GO.0005689_U12_TYPE_SPLICEOSOMAL_COMPLEX	1
GO.0005730_NUCLEOLUS	1
GO.0006260_DNA_REPLICATION	1
GO.0006357_REGULATION_OF_TRANSCRIPTION_FROM_RNA_POLYMERASE_II_PROMOTER	1
GO.0006367_TRANSCRIPTION_INITIATION_FROM_RNA_POLYMERASE_II_PROMOTER	1
GO.0007049_CELL_CYCLE	1
GO.0007067_MITOSIS	1
GO.0007498_MESODERM_DEVELOPMENT	1
GO.0008033_TRNA_PROCESSING	1
GO.0008094_DNA_DEPENDENT_ATPASE_ACTIVITY	1
GO.0010212_RESPONSE_TO_IONIZING_RADIATION	1
GO.0016568_CHROMATIN_MODIFICATION	1
GO.0016592_MEDIATOR_COMPLEX	1
GO.0051028_MRNA_TRANSPORT	1
GO.0070936_PROTEIN_K48_LINKED_UBIQUITINATION	1
GO.0000079_REGULATION_OF_CYCLIN_DEPENDENT_PROTEIN_KINASE_ACTIVITY	1
GO.0000786_NUCLEOSOME	1
GO.0001756_SOMITOGENESIS	1
GO.0003143_EMBRYONIC_HEART_TUBE_MORPHOGENESIS	1
GO.0003682_CHROMATIN_BINDING	1
GO.0003777_MICROTUBULE_MOTOR_ACTIVITY	1
GO.0006310_DNA_RECOMBINATION	1
GO.0006334_NUCLEOSOME_ASSEMBLY	1
GO.0006366_TRANSCRIPTION_FROM_RNA_POLYMERASE_II_PROMOTER	1
GO.0006417_REGULATION_OF_TRANSLATION	1
GO.0007059_CHROMOSOME_SEGREGATION	1
GO.0008287_PROTEIN_SERINE_THREONINE_PHOSPHATASE_COMPLEX	1
GO.0009880_EMBRYONIC_PATTERN_SPECIFICATION	1
GO.0009952_ANTERIOR_POSTERIOR_PATTERN_FORMATION	1
GO.0009953_DORSAL_VENTRAL_PATTERN_FORMATION	1
GO.0016817_HYDROLASE_ACTIVITY._ACTING_ON_ACID_ANHYDRIDES	1
GO.0030901_MIDBRAIN_DEVELOPMENT	1
GO.0042074_CELL_MIGRATION_INVOLVED_IN_GASTRULATION	1
GO.0042254_RIBOSOME_BIOGENESIS	1
GO.0043049_OTIC_PLACODE_FORMATION	1
GO.0000122_NEGATIVE_REGULATION_OF_TRANSCRIPTION_FROM_RNA_POLYMERASE_II_PROMOTER	1
GO.0000209_PROTEIN_POLYUBIQUITINATION	1
GO.0000785_CHROMATIN	1
GO.0000910_CYTOKINESIS	1
GO.0000922_SPINDLE_POLE	1
GO.0001666_RESPONSE_TO_HYPOXIA	1
GO.0001755_NEURAL_CREST_CELL_MIGRATION	1
GO.0001947_HEART_LOOPING	1
GO.0003007_HEART_MORPHOGENESIS	1
GO.0003714_TRANSCRIPTION_COREPRESSOR_ACTIVITY	1
GO.0003725_DOUBLE_STRANDED_RNA_BINDING	1
GO.0003779_ACTIN_BINDING	1
GO.0004177_AMINOPEPTIDASE_ACTIVITY	1
GO.0004180_CARBOXYPEPTIDASE_ACTIVITY	1
GO.0004252_SERINE_TYPE_ENDOPEPTIDASE_ACTIVITY	1
GO.0004527_EXONUCLEASE_ACTIVITY	1
GO.0004553_HYDROLASE_ACTIVITY._HYDROLYZING_O_GLYCOSYL_COMPOUNDS	1
GO.0004713_PROTEIN_TYROSINE_KINASE_ACTIVITY	1
GO.0004721_PHOSPHOPROTEIN_PHOSPHATASE_ACTIVITY	1
GO.0004871_SIGNAL_TRANSDUCER_ACTIVITY	1
GO.0004888_TRANSMEMBRANE_RECEPTOR_ACTIVITY	1
GO.0005102_RECEPTOR_BINDING	1
GO.0005267_POTASSIUM_CHANNEL_ACTIVITY	1
GO.0005385_ZINC_ION_TRANSMEMBRANE_TRANSPORTER_ACTIVITY	1
GO.0005624_MEMBRANE_FRACTION	1
GO.0005667_TRANSCRIPTION_FACTOR_COMPLEX	1
GO.0005739_MITOCHONDRION	1
GO.0005743_MITOCHONDRIAL_INNER_MEMBRANE	1
GO.0005765_LYSOSOMAL_MEMBRANE	1
GO.0005777_PEROXISOME	1
GO.0005792_MICROSOME	1
GO.0005815_MICROTUBULE_ORGANIZING_CENTER	1
GO.0005819_SPINDLE	1
GO.0005874_MICROTUBULE	1
GO.0005876_SPINDLE_MICROTUBULE	1
GO.0005886_PLASMA_MEMBRANE	1
GO.0005921_GAP_JUNCTION	1
GO.0005922_CONNEXON_COMPLEX	1
GO.0006289_NUCLEOTIDE_EXCISION_REPAIR	1
GO.0006414_TRANSLATIONAL_ELONGATION	1
GO.0006457_PROTEIN_FOLDING	1
GO.0006468_PROTEIN_PHOSPHORYLATION	1
GO.0006511_UBIQUITIN_DEPENDENT_PROTEIN_CATABOLIC_PROCESS	1
GO.0006629_LIPID_METABOLIC_PROCESS	1
GO.0006633_FATTY_ACID_BIOSYNTHETIC_PROCESS	1
GO.0006662_GLYCEROL_ETHER_METABOLIC_PROCESS	1
GO.0006730_ONE_CARBON_METABOLIC_PROCESS	1
GO.0006816_CALCIUM_ION_TRANSPORT	1
GO.0006950_RESPONSE_TO_STRESS	1
GO.0006955_IMMUNE_RESPONSE	1
GO.0006979_RESPONSE_TO_OXIDATIVE_STRESS	1
GO.0007017_MICROTUBULE_BASED_PROCESS	1
GO.0007018_MICROTUBULE_BASED_MOVEMENT	1
GO.0007154_CELL_COMMUNICATION	1
GO.0007160_CELL_MATRIX_ADHESION	1
GO.0007166_CELL_SURFACE_RECEPTOR_LINKED_SIGNALING_PATHWAY	1
GO.0007179_TRANSFORMING_GROWTH_FACTOR_BETA_RECEPTOR_SIGNALING_PATHWAY	1
GO.0007283_SPERMATOGENESIS	1
GO.0007368_DETERMINATION_OF_LEFT_RIGHT_SYMMETRY	1
GO.0007399_NERVOUS_SYSTEM_DEVELOPMENT	1
GO.0007507_HEART_DEVELOPMENT	1
GO.0008017_MICROTUBULE_BINDING	1
GO.0008022_PROTEIN_C_TERMINUS_BINDING	1
GO.0008134_TRANSCRIPTION_FACTOR_BINDING	1
GO.0008146_SULFOTRANSFERASE_ACTIVITY	1
GO.0008152_METABOLIC_PROCESS	1
GO.0008168_METHYLTRANSFERASE_ACTIVITY	1
GO.0008201_HEPARIN_BINDING	1
GO.0008236_SERINE_TYPE_PEPTIDASE_ACTIVITY	1
GO.0008237_METALLOPEPTIDASE_ACTIVITY	1
GO.0008373_SIALYLTRANSFERASE_ACTIVITY	1
GO.0008610_LIPID_BIOSYNTHETIC_PROCESS	1
GO.0009055_ELECTRON_CARRIER_ACTIVITY	1
GO.0009408_RESPONSE_TO_HEAT	1
GO.0009615_RESPONSE_TO_VIRUS	1
GO.0009897_EXTERNAL_SIDE_OF_PLASMA_MEMBRANE	1
GO.0015662_ATPASE_ACTIVITY._COUPLED_TO_TRANSMEMBRANE_MOVEMENT_OF_IONS._PHOSPHORYLATIVE_MECHANISM	1
GO.0016311_DEPHOSPHORYLATION	1
GO.0016477_CELL_MIGRATION	1
GO.0016605_PML_BODY	1
GO.0016616_OXIDOREDUCTASE_ACTIVITY._ACTING_ON_THE_CH_OH_GROUP_OF_DONORS._NAD_OR_NADP_AS_ACCEPTOR	1
GO.0016702_OXIDOREDUCTASE_ACTIVITY._ACTING_ON_SINGLE_DONORS_WITH_INCORPORATION_OF_MOLECULAR_OXYGEN._INCORPORATION_OF_TWO_ATOMS_OF_OXYGEN	1
GO.0016772_TRANSFERASE_ACTIVITY._TRANSFERRING_PHOSPHORUS_CONTAINING_GROUPS	1
GO.0016779_NUCLEOTIDYLTRANSFERASE_ACTIVITY	1
GO.0016791_PHOSPHATASE_ACTIVITY	1
GO.0016810_HYDROLASE_ACTIVITY._ACTING_ON_CARBON_NITROGEN_.BUT_NOT_PEPTIDE._BONDS	1
GO.0016881_ACID_AMINO_ACID_LIGASE_ACTIVITY	1
GO.0018024_HISTONE_LYSINE_N_METHYLTRANSFERASE_ACTIVITY	1
GO.0019001_GUANYL_NUCLEOTIDE_BINDING	1
GO.0019899_ENZYME_BINDING	1
GO.0019901_PROTEIN_KINASE_BINDING	1
GO.0022857_TRANSMEMBRANE_TRANSPORTER_ACTIVITY	1
GO.0030097_HEMOPOIESIS	1
GO.0030163_PROTEIN_CATABOLIC_PROCESS	1
GO.0030170_PYRIDOXAL_PHOSPHATE_BINDING	1
GO.0030176_INTEGRAL_TO_ENDOPLASMIC_RETICULUM_MEMBRANE	1
GO.0030218_ERYTHROCYTE_DIFFERENTIATION	1
GO.0030308_NEGATIVE_REGULATION_OF_CELL_GROWTH	1
GO.0031016_PANCREAS_DEVELOPMENT	1
GO.0031017_EXOCRINE_PANCREAS_DEVELOPMENT	1
GO.0031101_FIN_REGENERATION	1
GO.0031965_NUCLEAR_MEMBRANE	1
GO.0032313_REGULATION_OF_RAB_GTPASE_ACTIVITY	1
GO.0035091_PHOSPHATIDYLINOSITOL_BINDING	1
GO.0035162_EMBRYONIC_HEMOPOIESIS	1
GO.0040007_GROWTH	1
GO.0042826_HISTONE_DEACETYLASE_BINDING	1
GO.0043010_CAMERA_TYPE_EYE_DEVELOPMENT	1
GO.0043169_CATION_BINDING	1
GO.0043234_PROTEIN_COMPLEX	1
GO.0043966_HISTONE_H3_ACETYLATION	1
GO.0045087_INNATE_IMMUNE_RESPONSE	1
GO.0045892_NEGATIVE_REGULATION_OF_TRANSCRIPTION._DNA_DEPENDENT	1
GO.0048514_BLOOD_VESSEL_MORPHOGENESIS	1
GO.0048703_EMBRYONIC_VISCEROCRANIUM_MORPHOGENESIS	1
GO.0048793_PRONEPHROS_DEVELOPMENT	1
GO.0050660_FLAVIN_ADENINE_DINUCLEOTIDE_BINDING	1
GO.0050821_PROTEIN_STABILIZATION	1
GO.0051082_UNFOLDED_PROTEIN_BINDING	1
GO.0051216_CARTILAGE_DEVELOPMENT	1
GO.0051537_2_IRON._2_SULFUR_CLUSTER_BINDING	1
GO.0051539_4_IRON._4_SULFUR_CLUSTER_BINDING	1
GO.0051592_RESPONSE_TO_CALCIUM_ION	1
GO.0051726_REGULATION_OF_CELL_CYCLE	1
GO.0055085_TRANSMEMBRANE_TRANSPORT	1
GO.0060026_CONVERGENT_EXTENSION	1
GO.0060028_CONVERGENT_EXTENSION_INVOLVED_IN_AXIS_ELONGATION	1
GO.0070588_CALCIUM_ION_TRANSMEMBRANE_TRANSPORT	1
GO.0071805_POTASSIUM_ION_TRANSMEMBRANE_TRANSPORT	1
GO.0090090_NEGATIVE_REGULATION_OF_CANONICAL_WNT_RECEPTOR_SIGNALING_PATHWAY	1
GO.0001525_ANGIOGENESIS	1
GO.0001568_BLOOD_VESSEL_DEVELOPMENT	1
GO.0001570_VASCULOGENESIS	1
GO.0001764_NEURON_MIGRATION	1
GO.0001889_LIVER_DEVELOPMENT	1
GO.0002040_SPROUTING_ANGIOGENESIS	1
GO.0003684_DAMAGED_DNA_BINDING	1
GO.0003713_TRANSCRIPTION_COACTIVATOR_ACTIVITY	1
GO.0003729_MRNA_BINDING	1
GO.0004221_UBIQUITIN_THIOLESTERASE_ACTIVITY	1
GO.0004672_PROTEIN_KINASE_ACTIVITY	1
GO.0004674_PROTEIN_SERINE_THREONINE_KINASE_ACTIVITY	1
GO.0004722_PROTEIN_SERINE_THREONINE_PHOSPHATASE_ACTIVITY	1
GO.0004842_UBIQUITIN_PROTEIN_LIGASE_ACTIVITY	1
GO.0005044_SCAVENGER_RECEPTOR_ACTIVITY	1
GO.0005506_IRON_ION_BINDING	1
GO.0005507_COPPER_ION_BINDING	1
GO.0005654_NUCLEOPLASM	1
GO.0006418_TRNA_AMINOACYLATION_FOR_PROTEIN_TRANSLATION	1
GO.0006754_ATP_BIOSYNTHETIC_PROCESS	1
GO.0006812_CATION_TRANSPORT	1
GO.0007169_TRANSMEMBRANE_RECEPTOR_PROTEIN_TYROSINE_KINASE_SIGNALING_PATHWAY	1
GO.0007219_NOTCH_SIGNALING_PATHWAY	1
GO.0007229_INTEGRIN_MEDIATED_SIGNALING_PATHWAY	1
GO.0007243_INTRACELLULAR_PROTEIN_KINASE_CASCADE	1
GO.0007420_BRAIN_DEVELOPMENT	1
GO.0007596_BLOOD_COAGULATION	1
GO.0008045_MOTOR_AXON_GUIDANCE	1
GO.0008284_POSITIVE_REGULATION_OF_CELL_PROLIFERATION	1
GO.0008305_INTEGRIN_COMPLEX	1
GO.0016055_WNT_RECEPTOR_SIGNALING_PATHWAY	1
GO.0016705_OXIDOREDUCTASE_ACTIVITY._ACTING_ON_PAIRED_DONORS._WITH_INCORPORATION_OR_REDUCTION_OF_MOLECULAR_OXYGEN	1
GO.0019825_OXYGEN_BINDING	1
GO.0019904_PROTEIN_DOMAIN_SPECIFIC_BINDING	1
GO.0020037_HEME_BINDING	1
GO.0030182_NEURON_DIFFERENTIATION	1
GO.0030917_MIDBRAIN_HINDBRAIN_BOUNDARY_DEVELOPMENT	1
GO.0031290_RETINAL_GANGLION_CELL_AXON_GUIDANCE	1
GO.0031410_CYTOPLASMIC_VESICLE	1
GO.0032259_METHYLATION	1
GO.0042493_RESPONSE_TO_DRUG	1
GO.0045944_POSITIVE_REGULATION_OF_TRANSCRIPTION_FROM_RNA_POLYMERASE_II_PROMOTER	1
GO.0050896_RESPONSE_TO_STIMULUS	1
GO.0051287_NAD_BINDING	1
GO.0060041_RETINA_DEVELOPMENT_IN_CAMERA_TYPE_EYE	1
GO.0060047_HEART_CONTRACTION	1
GO.0000502_PROTEASOME_COMPLEX	1
GO.0003743_TRANSLATION_INITIATION_FACTOR_ACTIVITY	1
GO.0004175_ENDOPEPTIDASE_ACTIVITY	1
GO.0004298_THREONINE_TYPE_ENDOPEPTIDASE_ACTIVITY	1
GO.0004812_AMINOACYL_TRNA_LIGASE_ACTIVITY	1
GO.0005839_PROTEASOME_CORE_COMPLEX	1
GO.0006364_RRNA_PROCESSING	1
GO.0006413_TRANSLATIONAL_INITIATION	1
GO.0007517_MUSCLE_ORGAN_DEVELOPMENT	1
GO.0030900_FOREBRAIN_DEVELOPMENT	1
GO.0030902_HINDBRAIN_DEVELOPMENT	1
GO.0030903_NOTOCHORD_DEVELOPMENT	1
GO.0042221_RESPONSE_TO_CHEMICAL_STIMULUS	1
GO.0051603_PROTEOLYSIS_INVOLVED_IN_CELLULAR_PROTEIN_CATABOLIC_PROCESS	1
GO.0003735_STRUCTURAL_CONSTITUENT_OF_RIBOSOME	1
GO.0005509_CALCIUM_ION_BINDING	1
GO.0005578_PROTEINACEOUS_EXTRACELLULAR_MATRIX	1
GO.0005747_MITOCHONDRIAL_RESPIRATORY_CHAIN_COMPLEX_I	1
GO.0005840_RIBOSOME	1
GO.0006412_TRANSLATION	1
GO.0007275_MULTICELLULAR_ORGANISMAL_DEVELOPMENT	1
GO.0015986_ATP_SYNTHESIS_COUPLED_PROTON_TRANSPORT	1
GO.0015992_PROTON_TRANSPORT	1
GO.0022627_CYTOSOLIC_SMALL_RIBOSOMAL_SUBUNIT	1
GO.0030529_RIBONUCLEOPROTEIN_COMPLEX	1
GO.0031012_EXTRACELLULAR_MATRIX	1
GO.0043565_SEQUENCE_SPECIFIC_DNA_BINDING	1
GO.0004129_CYTOCHROME_C_OXIDASE_ACTIVITY	1
GO.0005198_STRUCTURAL_MOLECULE_ACTIVITY	1
GO.0005215_TRANSPORTER_ACTIVITY	1
GO.0005576_EXTRACELLULAR_REGION	1
GO.0005581_COLLAGEN	1
GO.0005615_EXTRACELLULAR_SPACE	1
GO.0006096_GLYCOLYSIS	1
GO.0006099_TRICARBOXYLIC_ACID_CYCLE	1
GO.0007155_CELL_ADHESION	1
GO.0007223_WNT_RECEPTOR_SIGNALING_PATHWAY._CALCIUM_MODULATING_PATHWAY	1
GO.0007411_AXON_GUIDANCE	1
GO.0007601_VISUAL_PERCEPTION	1
GO.0008083_GROWTH_FACTOR_ACTIVITY	1
GO.0015991_ATP_HYDROLYSIS_COUPLED_PROTON_TRANSPORT	1
GO.0045202_SYNAPSE	1
GO.0046933_HYDROGEN_ION_TRANSPORTING_ATP_SYNTHASE_ACTIVITY._ROTATIONAL_MECHANISM	1
GO.0001558_REGULATION_OF_CELL_GROWTH	1
GO.0004714_TRANSMEMBRANE_RECEPTOR_PROTEIN_TYROSINE_KINASE_ACTIVITY	1
GO.0004867_SERINE_TYPE_ENDOPEPTIDASE_INHIBITOR_ACTIVITY	1
GO.0005179_HORMONE_ACTIVITY	1
GO.0005216_ION_CHANNEL_ACTIVITY	1
GO.0005230_EXTRACELLULAR_LIGAND_GATED_ION_CHANNEL_ACTIVITY	1
GO.0005244_VOLTAGE_GATED_ION_CHANNEL_ACTIVITY	1
GO.0005520_INSULIN_LIKE_GROWTH_FACTOR_BINDING	1
GO.0005544_CALCIUM_DEPENDENT_PHOSPHOLIPID_BINDING	1
GO.0005882_INTERMEDIATE_FILAMENT	1
GO.0006811_ION_TRANSPORT	1
GO.0007156_HOMOPHILIC_CELL_ADHESION	1
GO.0008021_SYNAPTIC_VESICLE	1
GO.0009790_EMBRYO_DEVELOPMENT	1
GO.0009986_CELL_SURFACE	1
GO.0015078_HYDROGEN_ION_TRANSMEMBRANE_TRANSPORTER_ACTIVITY	1
GO.0030054_CELL_JUNCTION	1
GO.0034765_REGULATION_OF_ION_TRANSMEMBRANE_TRANSPORT	1
GO.0045211_POSTSYNAPTIC_MEMBRANE	1
GO.0051258_PROTEIN_POLYMERIZATION	1
GO.0003707_STEROID_HORMONE_RECEPTOR_ACTIVITY	1
GO.0004497_MONOOXYGENASE_ACTIVITY	1
GO.0004879_LIGAND_DEPENDENT_NUCLEAR_RECEPTOR_ACTIVITY	1
GO.0004896_CYTOKINE_RECEPTOR_ACTIVITY	1
GO.0004930_G_PROTEIN_COUPLED_RECEPTOR_ACTIVITY	1
GO.0005249_VOLTAGE_GATED_POTASSIUM_CHANNEL_ACTIVITY	1
GO.0005887_INTEGRAL_TO_PLASMA_MEMBRANE	1
GO.0006813_POTASSIUM_ION_TRANSPORT	1
GO.0006814_SODIUM_ION_TRANSPORT	1
GO.0006821_CHLORIDE_TRANSPORT	1
GO.0006836_NEUROTRANSMITTER_TRANSPORT	1
GO.0007186_G_PROTEIN_COUPLED_RECEPTOR_PROTEIN_SIGNALING_PATHWAY	1
GO.0007218_NEUROPEPTIDE_SIGNALING_PATHWAY	1
GO.0008076_VOLTAGE_GATED_POTASSIUM_CHANNEL_COMPLEX	1
GO.0008289_LIPID_BINDING	1
GO.0008483_TRANSAMINASE_ACTIVITY	1
GO.0015293_SYMPORTER_ACTIVITY	1
GO.0016491_OXIDOREDUCTASE_ACTIVITY	1
GO.0016627_OXIDOREDUCTASE_ACTIVITY._ACTING_ON_THE_CH_CH_GROUP_OF_DONORS	1
GO.0022900_ELECTRON_TRANSPORT_CHAIN	1
GO.0043401_STEROID_HORMONE_MEDIATED_SIGNALING_PATHWAY	1
GO.0055114_OXIDATION_REDUCTION_PROCESS	1
